# Supplementary material for: An integrated respiratory microbial gene catalogue to better understand the microbial aetiology of Mycoplasma pneumoniae pneumonia
Source: PubMed Central journal article supplement (PMC6669060; doi:10.1093/gigascience/giz093), 2019-07-31

## An integrated respiratory microbial gene catalogue to better understand the microbial aetiology of *Mycoplasma pneumoniae pneumonia* --Manuscript Draft--

|                                                      |                                                                                                                                                                                                                                                                                                                                                                                                                                                                                                                                                                                                                                                                                                                                                                                                                                                                                                                                                                                                                                                                                                                                                                                                                                                                                                                                                                                                                                                                                                                                                                                                                                                                                                                                                                                                                                                                                                                                                                                 |                 |
|------------------------------------------------------|---------------------------------------------------------------------------------------------------------------------------------------------------------------------------------------------------------------------------------------------------------------------------------------------------------------------------------------------------------------------------------------------------------------------------------------------------------------------------------------------------------------------------------------------------------------------------------------------------------------------------------------------------------------------------------------------------------------------------------------------------------------------------------------------------------------------------------------------------------------------------------------------------------------------------------------------------------------------------------------------------------------------------------------------------------------------------------------------------------------------------------------------------------------------------------------------------------------------------------------------------------------------------------------------------------------------------------------------------------------------------------------------------------------------------------------------------------------------------------------------------------------------------------------------------------------------------------------------------------------------------------------------------------------------------------------------------------------------------------------------------------------------------------------------------------------------------------------------------------------------------------------------------------------------------------------------------------------------------------|-----------------|
| <b>Manuscript Number:</b>                            | GIGA-D-19-00029R3                                                                                                                                                                                                                                                                                                                                                                                                                                                                                                                                                                                                                                                                                                                                                                                                                                                                                                                                                                                                                                                                                                                                                                                                                                                                                                                                                                                                                                                                                                                                                                                                                                                                                                                                                                                                                                                                                                                                                               |                 |
| <b>Full Title:</b>                                   | An integrated respiratory microbial gene catalogue to better understand the microbial aetiology of <i>Mycoplasma pneumoniae pneumonia</i>                                                                                                                                                                                                                                                                                                                                                                                                                                                                                                                                                                                                                                                                                                                                                                                                                                                                                                                                                                                                                                                                                                                                                                                                                                                                                                                                                                                                                                                                                                                                                                                                                                                                                                                                                                                                                                       |                 |
| <b>Article Type:</b>                                 | Research                                                                                                                                                                                                                                                                                                                                                                                                                                                                                                                                                                                                                                                                                                                                                                                                                                                                                                                                                                                                                                                                                                                                                                                                                                                                                                                                                                                                                                                                                                                                                                                                                                                                                                                                                                                                                                                                                                                                                                        |                 |
| <b>Funding Information:</b>                          | Sanming Project of Medicine in Shenzhen (SZSM201512030)                                                                                                                                                                                                                                                                                                                                                                                                                                                                                                                                                                                                                                                                                                                                                                                                                                                                                                                                                                                                                                                                                                                                                                                                                                                                                                                                                                                                                                                                                                                                                                                                                                                                                                                                                                                                                                                                                                                         | Dr Yuejie Zheng |
|                                                      | Shenzhen Science and Technology Project (JCYJ20170303155012371)                                                                                                                                                                                                                                                                                                                                                                                                                                                                                                                                                                                                                                                                                                                                                                                                                                                                                                                                                                                                                                                                                                                                                                                                                                                                                                                                                                                                                                                                                                                                                                                                                                                                                                                                                                                                                                                                                                                 | Mr Heping Wang  |
|                                                      | Shenzhen Science and Technology Project (JCYJ20170816170527583)                                                                                                                                                                                                                                                                                                                                                                                                                                                                                                                                                                                                                                                                                                                                                                                                                                                                                                                                                                                                                                                                                                                                                                                                                                                                                                                                                                                                                                                                                                                                                                                                                                                                                                                                                                                                                                                                                                                 | Mr Heping Wang  |
|                                                      | Key Medical Disciplines Building Project of Shenzhen (SZXJ2017005)                                                                                                                                                                                                                                                                                                                                                                                                                                                                                                                                                                                                                                                                                                                                                                                                                                                                                                                                                                                                                                                                                                                                                                                                                                                                                                                                                                                                                                                                                                                                                                                                                                                                                                                                                                                                                                                                                                              | Mr Zhiwei Lu    |
|                                                      | Guangdong Medical Research Foundation (A2017213)                                                                                                                                                                                                                                                                                                                                                                                                                                                                                                                                                                                                                                                                                                                                                                                                                                                                                                                                                                                                                                                                                                                                                                                                                                                                                                                                                                                                                                                                                                                                                                                                                                                                                                                                                                                                                                                                                                                                | Mrs Yanmin Bao  |
| <b>Abstract:</b>                                     | <p><b>Background</b><br/>The imbalanced respiratory microbiota observed in pneumonia causes high morbidity and mortality in childhood. Respiratory metagenomic analysis demands a comprehensive microbial gene catalogue, which will significantly advance our understanding of host–microorganism interactions.</p> <p><b>Results</b><br/>We collected 334 respiratory microbial samples from 171 healthy children and 76 children with pneumonia. The respiratory microbial gene catalogue we established comprised 2.25 million non-redundant microbial genes, covering 90.52% of prevalent genes. The major oropharyngeal microbial species found in healthy children were <i>Prevotella</i> and <i>Streptococcus</i>. In children with <i>Mycoplasma pneumoniae pneumonia</i> (MPP), oropharyngeal microbial diversity and associated gene numbers decreased compared to those of healthy children. The concurrence network of oropharyngeal microorganisms in patients predominantly featured <i>Staphylococcus</i> spp. and <i>M. pneumoniae</i>. Functional orthologues, which are associated with the metabolism of various lipids, membrane transport and signal transduction, accumulated in the oropharyngeal microbiome of children with pneumonia. Several antibiotic resistance genes and virulence factor genes were identified in the genomes of <i>M. pneumoniae</i> and 13 other microorganisms reconstructed via metagenomic data. Although the common macrolide/beta-lactam resistance genes were not identified in the assembled <i>M. pneumoniae</i> genome, a single nucleotide polymorphism (A2063G) related to macrolide resistance was identified in a 23S rRNA gene.</p> <p><b>Conclusions</b><br/>The results of this study will facilitate exploration of unknown microbial components and host–microorganism interactions in studies of the respiratory microbiome. It will also yield further insights into the microbial aetiology of MPP.</p> |                 |
| <b>Corresponding Author:</b>                         | Yuejie Zheng<br>Shenzhen Children's Hospital<br>Shenzhen, Guangdong CHINA                                                                                                                                                                                                                                                                                                                                                                                                                                                                                                                                                                                                                                                                                                                                                                                                                                                                                                                                                                                                                                                                                                                                                                                                                                                                                                                                                                                                                                                                                                                                                                                                                                                                                                                                                                                                                                                                                                       |                 |
| <b>Corresponding Author Secondary Information:</b>   |                                                                                                                                                                                                                                                                                                                                                                                                                                                                                                                                                                                                                                                                                                                                                                                                                                                                                                                                                                                                                                                                                                                                                                                                                                                                                                                                                                                                                                                                                                                                                                                                                                                                                                                                                                                                                                                                                                                                                                                 |                 |
| <b>Corresponding Author's Institution:</b>           | Shenzhen Children's Hospital                                                                                                                                                                                                                                                                                                                                                                                                                                                                                                                                                                                                                                                                                                                                                                                                                                                                                                                                                                                                                                                                                                                                                                                                                                                                                                                                                                                                                                                                                                                                                                                                                                                                                                                                                                                                                                                                                                                                                    |                 |
| <b>Corresponding Author's Secondary Institution:</b> |                                                                                                                                                                                                                                                                                                                                                                                                                                                                                                                                                                                                                                                                                                                                                                                                                                                                                                                                                                                                                                                                                                                                                                                                                                                                                                                                                                                                                                                                                                                                                                                                                                                                                                                                                                                                                                                                                                                                                                                 |                 |

|                                                                                                                                                                                                                                   |                                                                                                                                                                                                                                                                    |
|-----------------------------------------------------------------------------------------------------------------------------------------------------------------------------------------------------------------------------------|--------------------------------------------------------------------------------------------------------------------------------------------------------------------------------------------------------------------------------------------------------------------|
| <b>First Author:</b>                                                                                                                                                                                                              | Wenkui Dai                                                                                                                                                                                                                                                         |
| <b>First Author Secondary Information:</b>                                                                                                                                                                                        |                                                                                                                                                                                                                                                                    |
| <b>Order of Authors:</b>                                                                                                                                                                                                          | Wenkui Dai                                                                                                                                                                                                                                                         |
|                                                                                                                                                                                                                                   | Heping Wang                                                                                                                                                                                                                                                        |
|                                                                                                                                                                                                                                   | Dongfang Li                                                                                                                                                                                                                                                        |
|                                                                                                                                                                                                                                   | Qian Zhou                                                                                                                                                                                                                                                          |
|                                                                                                                                                                                                                                   | Xin Feng                                                                                                                                                                                                                                                           |
|                                                                                                                                                                                                                                   | Zhenyu Yang                                                                                                                                                                                                                                                        |
|                                                                                                                                                                                                                                   | Wenjian Wang                                                                                                                                                                                                                                                       |
|                                                                                                                                                                                                                                   | Chuangzhao Qiu                                                                                                                                                                                                                                                     |
|                                                                                                                                                                                                                                   | Zhiwei Lu                                                                                                                                                                                                                                                          |
|                                                                                                                                                                                                                                   | Ximing Xu                                                                                                                                                                                                                                                          |
|                                                                                                                                                                                                                                   | Mengxuan Lyu                                                                                                                                                                                                                                                       |
|                                                                                                                                                                                                                                   | Gan Xie                                                                                                                                                                                                                                                            |
|                                                                                                                                                                                                                                   | Yinhu Li                                                                                                                                                                                                                                                           |
|                                                                                                                                                                                                                                   | Yanmin Bao                                                                                                                                                                                                                                                         |
|                                                                                                                                                                                                                                   | Yanhong Liu                                                                                                                                                                                                                                                        |
|                                                                                                                                                                                                                                   | Kunling Shen                                                                                                                                                                                                                                                       |
|                                                                                                                                                                                                                                   | Kaihu Yao                                                                                                                                                                                                                                                          |
|                                                                                                                                                                                                                                   | Xikang Feng                                                                                                                                                                                                                                                        |
|                                                                                                                                                                                                                                   | Yonghong Yang                                                                                                                                                                                                                                                      |
|                                                                                                                                                                                                                                   | Shuaicheng Li                                                                                                                                                                                                                                                      |
|                                                                                                                                                                                                                                   | Ke Zhou                                                                                                                                                                                                                                                            |
|                                                                                                                                                                                                                                   | Yuejie Zheng                                                                                                                                                                                                                                                       |
| <b>Order of Authors Secondary Information:</b>                                                                                                                                                                                    |                                                                                                                                                                                                                                                                    |
| <b>Response to Reviewers:</b>                                                                                                                                                                                                     | Dear Editors,<br><br><p style="margin-left: 40px;">Thanks for your professional assessments and comments.<br/> We have addressed the comments and approved the revision.<br/> Please kindly check the updated manuscript without tracked changes.</p> Yuejie Zheng |
| <b>Additional Information:</b>                                                                                                                                                                                                    |                                                                                                                                                                                                                                                                    |
| <b>Question</b>                                                                                                                                                                                                                   | <b>Response</b>                                                                                                                                                                                                                                                    |
| Are you submitting this manuscript to a special series or article collection?                                                                                                                                                     | No                                                                                                                                                                                                                                                                 |
| <b>Experimental design and statistics</b>                                                                                                                                                                                         | Yes                                                                                                                                                                                                                                                                |
| Full details of the experimental design and statistical methods used should be given in the Methods section, as detailed in our <a href="#">Minimum Standards Reporting Checklist</a> . Information essential to interpreting the |                                                                                                                                                                                                                                                                    |

|                                                                                                                                                                                                                                                                                                                                                                                                                                                                                                                                                         |            |
|---------------------------------------------------------------------------------------------------------------------------------------------------------------------------------------------------------------------------------------------------------------------------------------------------------------------------------------------------------------------------------------------------------------------------------------------------------------------------------------------------------------------------------------------------------|------------|
| <p>data presented should be made available in the figure legends.</p> <p>Have you included all the information requested in your manuscript?</p>                                                                                                                                                                                                                                                                                                                                                                                                        |            |
| <p><b>Resources</b></p> <p>A description of all resources used, including antibodies, cell lines, animals and software tools, with enough information to allow them to be uniquely identified, should be included in the Methods section. Authors are strongly encouraged to cite <a href="#">Research Resource Identifiers</a> (RRIDs) for antibodies, model organisms and tools, where possible.</p> <p>Have you included the information requested as detailed in our <a href="#">Minimum Standards Reporting Checklist</a>?</p>                     | <p>Yes</p> |
| <p><b>Availability of data and materials</b></p> <p>All datasets and code on which the conclusions of the paper rely must be either included in your submission or deposited in <a href="#">publicly available repositories</a> (where available and ethically appropriate), referencing such data using a unique identifier in the references and in the “Availability of Data and Materials” section of your manuscript.</p> <p>Have you have met the above requirement as detailed in our <a href="#">Minimum Standards Reporting Checklist</a>?</p> | <p>Yes</p> |

[Click here to view linked References](#)

1 **An integrated respiratory microbial gene catalogue to better**  
2 **understand the microbial aetiology of *Mycoplasma pneumoniae***  
3 **pneumonia**

4 Wenkui Dai<sup>2,#</sup>, Heping Wang<sup>1,#</sup>, Dongfang Li<sup>3,#</sup>, Qian Zhou<sup>4</sup>, Xin Feng<sup>4</sup>, Zhenyu  
5 Yang<sup>4</sup>, Wenjian Wang<sup>1</sup>, Chuangzhao Qiu<sup>4</sup>, Zhiwei Lu<sup>1</sup>, Ximing Xu<sup>5</sup>, Mengxuan Lyu<sup>2</sup>,  
6 Gan Xie<sup>1</sup>, Yinhu Li<sup>4</sup>, Yanmin Bao<sup>1</sup>, Yanhong Liu<sup>4</sup>, Kunling Shen<sup>1,6</sup>, Kaihu Yao<sup>1,6</sup>,  
7 Xikang Feng<sup>2</sup>, Yonghong Yang<sup>1,4,6</sup>, Shuaicheng Li<sup>2</sup>, Ke Zhou<sup>3,\*</sup>, Yuejie Zheng<sup>1,\*</sup>

8

9 <sup>1</sup>Department of Respiratory Diseases, Shenzhen Children's Hospital, Shenzhen  
10 518026, China

11 <sup>2</sup>Department of Computer Science, City University of Hong Kong, Hong Kong  
12 999077, China

13 <sup>3</sup>Wuhan National Laboratory for Optoelectronics, Huazhong University of Science  
14 and Technology, No. 1037 Luoyu Road, Wuhan 430074, China

15 <sup>4</sup>Department of Microbial Research, WeHealthGene Institute, Shenzhen 518000,  
16 China

17 <sup>5</sup>Institute of Statistics, Nankai University, No. 94 Weijin Road, Tianjin 300071, China

18 <sup>6</sup>Department of Respiratory Diseases, Beijing Children's Hospital, Beijing 100045,

19 China

20 #These authors contributed equally to this work.

21 \*Corresponding authors

22

23 ORCIDs and email addresses:

24 Wenkui Dai, 0000-0002-9723-1416, daiwenkui84@gmail.com; Heping Wang,

25 0000-0002-9527-1334, szetgmy@163.com; Dongfang Li, 0000-0002-6587-2892,

26 loveli\_biocc@163.com; Qian Zhou, 0000-0002-8433-2875,

27 zhouqian@wehealthgene.com; Xin Feng, 0000-0003-1853-7255,

28 fengxin@wehealthgene.com; Zhenyu Yang, yangzhy@wehealthgene.com; Wenjian

29 Wang, 0000-0001-9459-3764, dhbk2005@163.com; Chuangzhao Qiu,

30 0000-0001-5560-0992, qiuchzh@wehealthgene.com; Zhiwei Lu,

31 luzhiwei1950@163.com; Ximing Xu, ximing@nankai.edu.cn; Mengxuan Lyu,

32 mengxualv2-c@my.cityu.edu.hk; Gan Xie, 0000-0001-6041-2523,

33 xiegan1987@163.com; Yinhu Li, 0000-0001-6378-6571, liyh@wehealthgene.com;  
34 Yanmin Bao, baoyanming1978@163.com; Yanhong Liu,  
35 liuyanhong@wehealthgene.com; Kunling Shen, kunlingshen1717@163.com; Kaihu  
36 Yao, jiuju2655@sina.com; Xikang Feng, xikangfeng2-c@my.cityu.edu.hk; Yonghong  
37 Yang, 0000-0002-8423-1652, yyh628628@sina.com; Shuaicheng Li,  
38 0000-0001-6246-6349; shuaicli@cityu.edu.hk; Ke Zhou, k.zhou@hust.edu.cn; Yuejie  
39 Zheng, 0000-0003-1094-2395, shine1990@sina.com.

40

#### 41 **Abstract**

42 **Background:** The imbalanced respiratory microbiota observed in pneumonia causes  
43 high morbidity and mortality in childhood. Respiratory metagenomic analysis  
44 demands a comprehensive microbial gene catalogue, which will significantly advance  
45 our understanding of host–microorganism interactions. **Results:** We collected 334  
46 respiratory microbial samples from 171 healthy children and 76 children with  
47 pneumonia. The respiratory microbial gene catalogue we established comprised  
48 2.25 million non-redundant microbial genes, covering 90.52% of prevalent genes. The

49 major oropharyngeal microbial species found in healthy children were *Prevotella* and  
50 *Streptococcus*. In children with *Mycoplasma pneumoniae* pneumonia (MPP),  
51 oropharyngeal microbial diversity and associated gene numbers decreased compared  
52 to those of healthy children. The concurrence network of oropharyngeal  
53 microorganisms in patients predominantly featured *Staphylococcus spp.* and *M.*  
54 *pneumoniae*. Functional orthologues, which are associated with the metabolism of  
55 various lipids, membrane transport and signal transduction, accumulated in the  
56 oropharyngeal microbiome of children with pneumonia. Several antibiotic resistance  
57 genes and virulence factor genes were identified in the genomes of *M. pneumoniae*  
58 and 13 other microorganisms reconstructed via metagenomic data. Although the  
59 common macrolide/beta-lactam resistance genes were not identified in the assembled  
60 *M. pneumoniae* genome, a single nucleotide polymorphism (A2063G) related to  
61 macrolide resistance was identified in a 23S rRNA gene. **Conclusions:** The results of  
62 this study will facilitate exploration of unknown microbial components and host–  
63 microorganism interactions in studies of the respiratory microbiome. It will also yield  
64 further insights into the microbial aetiology of MPP.

65 **Keywords:** Pneumonia; *Mycoplasma pneumoniae*; Oropharynx; Microbiome;  
66 Respiratory microbial gene catalogue

67

## 68 **Background**

69 Several microorganisms have been identified as indispensable for the respiratory  
70 microbiota (RM) [1–5]. In cases of pneumonia, an imbalance in the levels of the  
71 microorganisms within the RM [6, 7] is a leading cause of high morbidity and  
72 mortality [8, 9] worldwide, especially in children under 5 years old [10, 11]. In recent  
73 years, the number of cases of *Mycoplasma pneumoniae* pneumonia (MPP) in Chinese  
74 children has been increasing [12] and the microbial aetiology of this disease remains  
75 poorly understood.

76 Previous studies by our group have revealed altered RM in children with MPP  
77 [13, 14]. However, current RM research has mainly focused on analysis of 16S rRNA  
78 [6, 7, 15, 16], which only provides cues about known bacterial components at the  
79 genus level. Emerging 16S rRNA analysis has revealed an imbalanced microbial  
80 structure in the respiratory tracts of children with pneumonia [7, 17, 18]; however,



81 changes in microbial functions and the species-level microbial components of the RM  
82 of patients with MPP remain unexplored. In addition, current multi-omics studies are  
83 limited to explorations of known bacterial genomes in the RM [15]. Nevertheless, the  
84 RM includes many unknown microbial species [1–3, 5, 6] that require further  
85 exploration.

86 A comprehensive catalogue of reference genes is crucial for in-depth functional  
87 metagenomic analysis such as species/gene profiling, discovery of microbial  
88 biomarkers and functional annotation. Given that the RM varies with the environment  
89 [19], age [1, 2, 4] and disease [6, 7, 15, 16], we took samples from the nasopharynx  
90 (NP), oropharynx (OP) and lungs of 76 children with pneumonia and OP samples  
91 from 171 healthy children in China. These samples were used to establish an  
92 integrated respiratory microbial gene catalogue (RMGC), with which to study the  
93 imbalanced RM in Chinese children with MPP. Using this catalogue, we assessed the  
94 microbial components and functions in the OP microbiota of healthy children and  
95 children with MPP, as well as the characteristics of recovered microbial genomes.

## 96 **Data Description**

97 Between 3 July 2016 and 27 August 2016, 247 patients were recruited from the  
98 hospitalization zone in the Department of Respiratory Diseases of Shenzhen  
99 Children's Hospital, China. Inclusion criteria were characteristic chest radiographic  
100 abnormalities consistent with pneumonia, exclusion of asthma and clearance of  
101 respiratory infections or exposure to antibiotics within one month of sampling (Table  
102 1). NP (25-800-A-50, Puritan, Guilford, ME, USA) and OP (155C, COPAN, Murrieta,  
103 CA, USA) swabs were collected from 76 hospitalized patients within 24 hours of  
104 hospitalization and before the administration of antibiotics. Broncho-alveolar lavage  
105 fluid (BALF) was collected 2–15 days after hospitalization (Supplementary Table 1).

106 Healthy children were recruited during physical examinations at Shenzhen  
107 Children's Hospital, China, between July and August of 2016. OP swabs were  
108 collected from 171 healthy children meeting the following inclusion criteria: no  
109 diagnosis of asthma or family history of allergy; no history of pneumonia; a lack of  
110 wheezing, fever, cough or other respiratory/allergic symptoms at sampling 1 month  
111 prior to the study and 1 week after sampling; no exposure to antibiotics 1 month prior  
112 to sampling.

113 All samples were collected by an experienced clinician. Samples were stored at  
114  $-80^{\circ}\text{C}$  within 20 minutes of collection and DNA was extracted within 10 days of  
115 sampling. A TGuide S32 Magnetic Swab Genomic DNA Kit (DP603-T2, TIANGEN  
116 Biotech (Beijing) Co., Ltd., Beijing, China) was utilized to extract the DNA.  
117 Metagenomic sequencing was performed using the Illumina Hi-Seq platform (San  
118 Diego, USA) according to the manufacturer's instructions. Unused swabs and DNA  
119 extraction kits from the same batch served as negative controls to assess DNA  
120 contamination.

121

## 122 **Sample information and data output**

123 Two hundred forty-seven children aged  $<13$  years were enrolled in this study (Table 1  
124 and Supplementary Table 1). After removing host contamination and low-quality data,  
125 metagenomic sequencing produced 4,765,288,986 reads, with an average of  
126 14,267,332 reads per sample. The DNA concentration of unused sampling swabs and  
127 DNA extraction kits was less than  $0.01\text{ ng}/\mu\text{l}$ , whereas the DNA concentration was  
128 greater than  $80\text{ ng}/\mu\text{l}$  in sampling swabs and BALF. Furthermore, the DNA

129 amplification results of extracted bacterial DNA were less than 0.01 nmol/l for the  
130 enveloped sampling or extraction materials (Supplementary Figure 1)

131

### 132 **Construction of the RMGC**

133 By applying metagenomics sequencing data from 247 children and three  
134 respiratory-related microbial genome/gene resources (Figure 1), we constructed a  
135 comprehensive RMGC with 2,245,343 non-redundant ORF. Data are freely accessible  
136 on our website [20]. The total length of ORFs in the RMGC was 1.71 Gbp and the  
137 average length was 760 nt (range: 102–32,241 nt). We selected 241 samples with  
138  $\geq 650$  Mb data to examine the coverage of the microbial genes in the RMGC. In  
139 accordance with the rarefaction curve, 90.52% of prevalent microbial genes were  
140 captured in the RMGC (Figure 2a and 2b).

141

### 142 **Taxonomic assessment and functional annotation of the RMGC**

143 Based on taxonomic profiling, 1,281,673 genes (57.08% of RMGC) were assigned to  
144 phyla and 1,143,382 genes (50.92% of RMGC) were assigned to genera, representing

145 56.58% and 51.75% of the sequencing reads, respectively. A total of 617,968 genes  
146 (25.92% of RMGC) were annotated to known bacterial species, representing 33.49%  
147 of the sequencing reads. The RMGC was dominated by the phyla Firmicutes,  
148 Bacteroides, Proteobacteria, Actinobacteria and Fusobacteria, while the most  
149 prevalent microbial genera were *Staphylococcus*, *Streptococcus*, *Haemophilus*,  
150 *Corynebacterium*, *Dolosigranulum*, *Prevotella*, *Blautia*, *Rothia*, *Porphyromonas*,  
151 *Lactobacillus*, *Veillonella*, *Fusobacterium* and *Leptotrichia*. Unknown microbial  
152 species accounted for 9.62–55.50% of the RMGC. Detailed taxonomic information of  
153 the RMGC is deposited on our website [20].

154 Metagenomic analysis revealed a genus-level microbial structure resembling the  
155 results of the 16S rRNA analysis (Supplementary Figure 2). Notably, a greater  
156 proportion of microbial genera remained unclassified in the metagenomic analysis  
157 than in the 16S rRNA analysis; this might be attributed to the wide detection by  
158 metagenomics sequencing and limited reference microbial genomes.

159 By aligning the RMGC to the KEGG database, 6,408 KEGG orthologous (KO)  
160 groups were identified, including 853,446 genes representing 37.85% of the total

161 sequencing data. As more samples were included, known microbial functions  
162 (annotated by KEGG) saturated quickly to 6,346 groups (Figure 2c). Combining  
163 novel gene families, the rarefaction curve plateaued when 12,924 groups were  
164 detected (Figure 2c). Upon alignment to the eggNOG database, 53.95% of genes in  
165 the RMGC were assigned to known functional categories.

166

### 167 **Core microbial species in the OP microbiota of healthy children**

168 We acquired 67 core species across five dominant phyla: Bacteroidetes, Firmicutes,  
169 Proteobacteria, Actinobacteria and Fusobacteria (Figure 3). *Prevotella*  
170 *melaninogenica* ( $4.38 \pm 2.91\%$ , mean  $\pm$  sd), *Prevotella sp.* ( $3.06 \pm 1.92\%$ ), *P. histicola*  
171 ( $3.23 \pm 3.58\%$ ), *P. pallens* ( $2.31 \pm 1.88\%$ ) and *Veillonella atypical* ( $1.60 \pm 1.44\%$ )  
172 were the top five microbial species. In addition, *Streptococcus pseudopneumoniae*  
173 ( $1.26 \pm 0.96\%$ ), *Haemophilus influenzae* ( $0.60 \pm 0.68\%$ ), *S. pneumoniae* ( $0.60 \pm$   
174  $0.50\%$ ), *H. parainfluenzae* ( $0.42 \pm 0.49\%$ ) and *Staphylococcus aureus* ( $0.27 \pm 1.52\%$ ),  
175 which were generally defined as opportunistic pathogens, were also prevalent in the  
176 OP microbiota of healthy children (Figure 3).

177

178 **Microbial structure and functions of the OP microbiome of children with MPP**  
179 **differed from those of healthy children**

180 Based on permutational analysis of variance (PERMANOVA), onset of pneumonia is  
181 the most significant factor (adjusted  $P$ -value  $<0.001$ ) explaining the variations  
182 observed in OP microbial samples. This is followed by feeding pattern (adjusted  
183  $P$ -value = 0.037) and age (adjusted  $P$ -value = 0.048). Compared with healthy children,  
184 children with MPP exhibited significantly decreased microbial gene numbers and  
185 alpha diversity of the OP microbiota (Figure 4a and 4b). Thirty co-abundance gene  
186 groups (CAGs) accumulated significantly in the OP microbiota of children with MPP,  
187 comprising six unknown and 24 known microbial species. These species were  
188 primary respiratory pathogens such as *M. pneumoniae*, *Staphylococcus epidermidis*  
189 and *S. aureus* (Figure 5a). Ninety-five CAGs were enriched in the OP microbiota of  
190 healthy children, including prevalent colonizers such as *Prevotella* species (Figure 5a).  
191 The microbial co-occurrence networks of children with MPP were simpler than those  
192 of healthy children; negative correlations were only identified between

193 healthy-enriched and MPP-enriched CAGs (Figure 5a). For example,  
194 healthy-enriched *Prevotella spp.* negatively correlated with MPP-enriched *S.*  
195 *epidermidis* ( $r < -0.60$ , adjusted  $P$ -value  $\leq 0.05$ , Figure 5a).

196 By comparing functional KEGG annotations (Supplementary Table 2), we  
197 assessed the functional alterations of the OP microbiota in children with MPP.  
198 Microbial functions relating to lipid metabolism, membrane transport and signal  
199 transduction were slightly enriched in children with MPP (Figure 5b). In contrast, the  
200 OP microbiota of healthy children was significantly enriched in orthologues involved  
201 in glycan biosynthesis and metabolism, biosynthesis of secondary metabolites, and  
202 cell growth and death (Figure 5b and Supplementary Table 2). Host  
203 homeostatis-associated functions, such as the immune system, digestive system,  
204 circulatory system and environmental adaptation, were also significantly abundant in  
205 the OP microbiota of healthy children (Figure 5b and Supplementary Table 2).

206

207 **Characterization of the *M. pneumoniae* genome and 13 other reconstructed**  
208 **microbial genomes**



209 We re-assembled 14 qualified microbial CAGs (Supplementary Table 3), representing  
210 the *M. pneumoniae* genome (0.80 Mbp) and the genomes of 13 other microorganisms  
211 (average genome size: 2.30 Mbp). The *M. pneumoniae* genome accumulated  
212 significantly in the OP microbiota of MPP patients and had high similarity with the  
213 reference genome (97.79% genome coverage; Supplementary Table 3). The *M.*  
214 *pneumoniae* genome included four antibiotic resistance genes (ARGs) against  
215 common antibiotics including peptide, rifamycin and fluoroquinolone (Figure 6,  
216 Supplementary Table 4). In eight patients who had been given experimental  
217 macrolides or beta-lactams (such as azithromycin, erythromycin or sulbactam), a SNP  
218 mutation, A2063G, which is related to macrolide resistance, was identified in the 23S  
219 rRNA (Supplementary Table 1). In addition, 136 virulence factor genes (VFGs) were  
220 found along its reassembled genome sequence (Supplementary Table 5), as well as  
221 redundant *M. pneumoniae* VFGs enriched in the secretion of adhesin P1,  
222 cytoadherence protein and community-acquired respiratory distress syndrome (CARDS)  
223 toxin (Figure 6 and Supplementary Table 5).

224 Of the 13 other microbial genomes included in our study, five could be annotated

225 as specific species, one was annotated at the genus level (*Ralstonia*), and the  
226 remaining seven were novel microbial genomes (average genome size 1.74 Mbp)  
227 (Supplementary Table 3). For the five annotated microbial species, *S. aureus* and *S.*  
228 *epidermidis* increased significantly in MPP patients, while the other three *Prevotella*  
229 *spp.* mainly accumulated in healthy children (Figure 7, Supplementary Table 3). The  
230 largest reassembled *Ralstonia* genome (5.89 Mbp) carried numerous ARGs, including  
231 13 beta-lactam ARGs, 21 tetracycline ARGs, and 11 macrolide ARGs. *P. histicola*, *P.*  
232 *shahii* and CAG00068 all had one copy each of a macrolide resistance gene and a  
233 beta-lactam antibiotic resistance gene. These genomes also harboured abundant VFG  
234 resources, ranging from 105 to 808 copies of relative genes. Correlation analysis  
235 revealed no significant correlation between these 14 reassembled microbial genomes  
236 and five clinical indices (Supplementary Table 6).

237

## 238 **Discussion**

239 Morbidity and mortality related to MPP is increasing in Chinese children. The  
240 development of RM studies has improved our understanding of the microbial

241 aetiology of MPP by revealing infection-associated RM imbalances [13, 14]. However,  
242 microbial functions and host–microbiota interactions in the RM of patients with MPP  
243 remain to be explored, particularly for novel microbial species.

244 In recent years, several reference gut microbial catalogues have been constructed  
245 to promote understanding of host–microorganism interactions. Qin et al. built a global  
246 view of the human gut microbiome (GM) and revealed a comprehensive functional  
247 potential of the prevalent gut microbial genes [21]. Li et al. upgraded the gut gene  
248 catalogue in 2014 [22], enabling studies to associate microbial genes with human  
249 health conditions. These frameworks have allowed researchers to deepen their  
250 understanding of the correlations between GM and various diseases, such as  
251 gastrointestinal and cardiovascular diseases [23, 24].

252 Like the reference gene catalogues that have been developed for the GM, our  
253 RMGC will further understanding of microbial aetiology in respiratory diseases. The  
254 development of a well-established RMGC is crucial for the functional metagenomics  
255 analysis needed to improve our knowledge of host–microbiota interactions in MPP.  
256 By aligning metagenomics data directly with the RMGC we have established,

257 researchers will be able to profile all microbial species, as well as explore microbial  
258 functions in both known and unknown microbial species. The fact that microbial  
259 assignment using the RMGC proved similar to that by 16S rRNA analysis also  
260 suggests that the RMGC may be promising for taxonomic studies using our  
261 constructed gene sets. Our data on the core microbial species of the OP microbiota in  
262 healthy children will provide a reference for exploring microbial and host–  
263 microorganism interactions in RM studies [25]. More generally, the RMGC provides  
264 a comprehensive respiratory-associated microbial profile to further microbiota  
265 analysis at the species level; functional profiling will facilitate further, more in-depth  
266 multi-omics analyses [26, 27], such as associations between proteins products and  
267 metabolites with known and novel microbial genomes. This capability would help to  
268 clarify interactions between the host and alterations to the RM during the progression  
269 of disease in MPP.

270       The OP microbiota of children with MPP has a simpler structure than that of  
271 healthy children. Previous studies have revealed that the bacteria-like *M. pneumoniae*  
272 is able to deplete levels of other bacteria through direct competition, and activates

273 bacterial clearance factors in host responses [28, 29]. This leads to decreased numbers  
274 colonising *Prevotella spp.*[30] and reduced proliferation of pathogens such as *S.*  
275 *aureus* and *S. epidermidis*. MPP patient-enriched genes have functions involved in  
276 membrane transport and the metabolism of various nutrients, which may partly  
277 explain the reduced tight junction proteins and increased respiratory mucosa  
278 permeability after infection [31]. Several studies have also identified increased  
279 glucose concentration in airway surface liquids [32–34] and associated pathogen  
280 proliferation [35]. This also corroborate the existence of enriched nutrient uptake  
281 pathways in the OP microbiota of children with MPP. Although the mechanism of *M.*  
282 *pneumoniae* clearance in the respiratory system remains unclear, these findings would  
283 provide new insights into host–microbiota interactions in MPP infection.

284 As well as a variety of well-known microorganisms, respiratory tracts also  
285 harbour numerous undiscovered microbial species [36]. Moreover, recent reports have  
286 demonstrated that a single bacterial genome can be recovered via reference gene sets  
287 and metagenomics data [37, 38]. It is difficult to culture *M. pneumoniae*, thus it is  
288 rarely done in clinical diagnosis, and this limits our understanding of antibiotic

289 resistance and virulence [39] in this species. Reconstruction of the *M. pneumoniae*  
290 genome using the RMGC and metagenomics data has indicated the existence of  
291 various ARGs related to RNA transcription [40], DNA replication [41] and protein  
292 synthesis [42]. According to clinical practice guidelines [43–45], most children with  
293 MPP are treated with azithromycin, erythromycin or sulbactam; none of these were  
294 associated with ARGs identified in the *M. pneumoniae* genome. Increasingly, reports  
295 demonstrate that specific dominant bacteria are associated with severe acute  
296 respiratory infections (ARIs) [6, 46, 47], but there have been no meaningful  
297 correlations identified between disease severity and *M. pneumoniae* – or indeed  
298 between the other species of reassembled bacteria found in the OP microbiota of  
299 children with MPP. In our previous studies, we confirmed the succession of *M.*  
300 *pneumoniae* infection in NP to OP and lung, and determined an association between  
301 *M. pneumoniae* load in the lung microbiota with disease severity [14].

302       Although no macrolide/beta-lactam resistance genes were discovered in the *M.*  
303 *pneumoniae* genome, one SNP mutation (23S RNA, 2063A→G) associated with  
304 macrolide resistance was identified in children with MPP. Meanwhile, in

305 patient-enriched microbial genomes such as *Ralstonia*, plenty of ARGs related to  
306 macrolide, beta-lactam and tetracycline resistance were found. Given rigorous  
307 antibiotic selective pressure and complex microbial interactions, environmentally  
308 redundant genetic components can be rapidly transferred into the pathogen genome by  
309 horizontal gene transfer [48, 49], causing the emergence of several diseases, such as  
310 happened in the European enterohemorrhagic *Escherichia coli* breakout [50] and the  
311 emergence of scarlet fever caused by *Streptococcus pyogenes* in Hong Kong [51].  
312 Considering these findings, it should be recognised that current regimes for the  
313 treatment of *M. pneumoniae* hold the potential to trigger emerging drug-resistant  
314 strains, whether in *M. pneumoniae* or other novel microbial species. Indeed,  
315 macrolide resistance has already been reported in *M. pneumoniae*-PCR-positive  
316 children [52–54].

317 In OP microbiota samples from healthy children, several bacterial genomes were  
318 recovered, including the key player *Prevotella spp.* [55, 56], and several other novel  
319 microorganisms, such as *Vampirovibrio*, which might function as pathogen  
320 competitors [57]. Microbial genomes recovered from respiratory tracts hold the

321 potential to improve our understanding of the microbial aetiology in MPP pneumonia.

322       There are several limitations of this study. Given that there are currently no  
323 effective medicines for MPP, the patients in our study received empirical treatments  
324 that might have slightly shifted their airway ecology [58]. Despite promising  
325 applications for the RMGC, unclassified CAGs and novel gene families in the RMGC  
326 must be annotated and further explored. The copy numbers of several genes require  
327 further assessment because of the potential for inaccuracies caused by the low  
328 respiratory bacterial biomass, NGS sequencing and assembly methods. In this study,  
329 the respiratory microbial samples were obtained from Chinese children; therefore, like  
330 the continual updates made to the GM reference genes, metagenomics data from a  
331 more diverse sample will be incorporated into the RMGC in the future to more  
332 broadly characterise microbial components and functions [22, 59, 60]. This will  
333 incrementally improve studies of the imbalanced RM in patients with respiratory  
334 diseases. Alterations in the OP microbiota of Chinese patients with MPP will also  
335 provide extensive insights into the microbial aetiology of acute respiratory infection.

336



337 **Potential implications**

338 The respiratory microbial gene catalogue established here will help to deepen  
339 respiratory micro-ecology research, and has the potential to elucidate respiratory  
340 microbial communities at the microbial species level. In addition, by aligning  
341 metagenomics data with the reference catalogue, our work will facilitate assembly of  
342 the genomes of novel microbial genera or species, allow exploration of microbial  
343 functions and their associated microbial components, and allow the construction of  
344 whole microbial networks within the respiratory microbial community. Established  
345 reference gene sets can be employed to deepen multi-omics analysis, which will  
346 further our understanding of host–microorganism interactions in acute respiratory  
347 infection. One example of how these gene sets might be used is in the comparison of  
348 the OP microbiota of healthy and diseased children.

349

350 **Methods**

351 **Clinical detection of infectious pathogens**

352 Broncho-alveolar lavage fluid was used to identify common microorganisms of the  
353 microbiota. Culturing was conducted to detect *Streptococcus pneumoniae*, *H.*  
354 *influenzae*, *Moraxella catarrhalis*, *Staphylococcus aureus* and *Staphylococcus*  
355 *haemolyticus*. The D3 Ultra DFA Respiratory Virus Screening and ID Kit (Diagnostic

356 Hybrids, Inc., Athens, OH, USA) was used to detect common viruses, including  
357 adenovirus (AdV), respiratory syncytial virus (RSV), influenza virus and  
358 parainfluenza virus. Cytomegalovirus (CMV) and Epstein–Barr virus (EBV) were  
359 detected using the Diagnostic Kit for Quantification of Human CMV DNA and EBV  
360 Polymerase Chain Reaction (PCR) Fluorescence Quantitative Diagnostic Kit,  
361 respectively (DaAnGene, Guangzhou, China). *M. pneumoniae* and *Chlamydia*  
362 *pneumonia* were diagnosed using a diagnostic kit for *M. pneumoniae* DNA (PCR  
363 Fluorescence Probing; DaAnGene) and Anti *C. pneumoniae* ELISA (IgM)  
364 (EUROIMMUN AG, Lübeck, Germany), respectively.

365

### 366 **Construction and annotation of the RMGC**

367 Sequencing data were filtered using a previously reported method [61]. Samples with  
368  $\geq 650$  Mbp data (Figure 1, Supplementary Figure 3) were selected for genome  
369 assembly using SOAPdenovo [62] (SOAPdenovo, RRID:SCR\_010752, v2.07, -F -K  
370 39 -M 3 -d 1). For samples with  $< 650$  Mbp data, data from the same respiratory site  
371 were mixed and assembled (Figure 1). Assembled contigs with  $\geq 500$  bps were

372 selected for gene prediction with MetaGeneMark [63] (v3.26, default parameters). We  
373 applied Glimmer3.02 [64] (Glimmer, RRID:SCR\_011931, default parameters) to  
374 predict genes from the 1,384 respiratory bacterial genomes in the Integrated Microbial  
375 Genomes and Microbiomes (IMG) database (2016-12-21 [65]). Gene sequences were  
376 also retrieved from the genomes of 73 respiratory bacteria in the Pathosystems  
377 Resource Integration Center (PATRIC) database (2017-3-25 [66]) and 450,204 open  
378 reading frames (ORFs) of respiratory bacteria in Human Microbiome Project (HMP)  
379 (2016-10-20 [67]). Genes with a length  $\geq 100$  bp and without Ns (unidentified  
380 nucleotides) were selected to construct non-redundant gene sets using CD-HIT [68]  
381 (CD-HIT, RRID:SCR\_007105, v4.66, -c 0.95 -aS 0.9). Genes with  $\geq 2$  mapped reads  
382 were retained in the established RMGC.

383 Taxonomic annotation of genes was conducted as follows:

384 i) Bacterial and viral genome sequences were retrieved from IMG  
385 (2016-12-21), PATRIC (2017-03-25) and National Center for  
386 Biotechnology Information (NCBI) NT database (2016-08-09 [69]);. The  
387 genome sequence with the longest N50 was selected as the representative

388 genome for each bacterial species. Non-redundant viral genomes were  
389 produced by CD-HIT (v4.66, -aS 0.95 -aL 0.9 -M 0). Gene sets in the  
390 RMGC were aligned to 6,869 representative bacterial genomes and  
391 18,916 non-redundant viral DNA genomes using BLASTN (BLASTN,  
392 RRID:SCR\_001598, v2.5.0, default parameters except -e 0.01)

393 ii) The top 10% highest-scoring alignments of each gene were retained, with  
394  $\geq 65\%$  identity and  $\geq 80\%$  gene length coverage

395 iii) Assignment of each gene was determined based on  $\geq 50\%$  consensus  
396 above the similarity threshold for a specific rank:  $\geq 65\%$  for phylum,  $\geq 85\%$   
397 for genus and  $\geq 95\%$  for species.

398 The functional annotation of each gene was determined by searching protein  
399 sequences in the Kyoto Encyclopedia of Genes and Genomes (KEGG) (v78.1)  
400 database and eggNOG (version 4.0) with BLASTP (BLASTP, RRID:SCR\_001010,  
401 v2.5.0, default parameters, except -e  $1e-5$ ). The best-hit alignment (identity  $\geq 30\%$  and  
402 coverage  $\geq 70\%$ ) was selected as the functional annotation for the gene. Genes without  
403 annotations in KEGG were identified as novel gene families by the Markov Cluster

404 Algorithm (MCL) [70] (inflation factor=1.1, bit-score cut-off=60).

405

406 **Comparing taxonomic assessments of 16S rRNA gene analysis and metagenomic**  
407 **analysis**

408 Seventy-two OP microbial samples with  $\geq 650$  Mb metagenomic sequencing data were  
409 aligned to establish the RMGC to determine taxonomic assignments. The same  
410 samples were also sequenced via the V3–V4 region of the 16S rRNA gene [13].  
411 Microbial compositions obtained by these two methods were compared to assess the  
412 accuracy of taxonomic assignments via metagenomic analysis.

413

414 **Rarefaction analysis**

415 We downsized the number of mapped reads to 3 million per sample to eliminate  
416 variable influence caused by the quantity of sequencing data. Estimation of total gene  
417 richness was done by randomly sampling five individuals 1,000 times using gene  
418 counting and Chao2 richness estimator [71].

419 To produce rarefaction curves of KEGG orthologous groups (KOs) and novel

420 gene families, saturation was evaluated by randomly sampling five individuals 1,000  
421 times. Relative rarefaction curves were visualized using R software (v3.3.2).

422

### 423 **Calculation of gene relative abundance in RMGC**

424 Filtered reads of metagenomics data from each sample were aligned to the RMGC  
425 using BWA (BWA, RRID:SCR\_010910, v0.7.13, default parameters, except for the  
426 mem and identity  $\geq 95\%$ ). Alignments meeting the following two criteria were  
427 accepted: i) paired-end reads mapped onto the same gene with the correct insert size;  
428 and ii) one end of a paired-reads was mapped onto the end of a gene, while the other  
429 was located outside of the gene.

430 If the number of genes in a given sample was  $n$ , the relative abundance was  
431 calculated using the following steps:

432 1. The copy number of the gene  $i$  ( $c(i)$ ) was calculated as:

433 
$$c(i) = \frac{t(i)}{l(i)}$$

434 where  $t(i)$  is the total number of mapped reads of gene  $i$  in a given sample, and  $l(i)$  is  
435 the length of the gene  $i$ .

436 2. The relative abundance of gene  $i$  ( $Ab\_g(i)$ ) was defined as:

$$437 \quad Ab\_g(i) = \frac{c(i)}{\sum_1^n c(i)}$$

438 3. If  $m$  genes can be assigned to the phylogenetic assignment  $s$ , the abundance of  
439 this phylogenetic assignment ( $Ab\_p(s)$ ) was calculated using the following equation:

$$440 \quad Ab\_p(s) = \sum_1^m Ab\_g(j)$$

441

#### 442 **Phylogenetic and functional profile of the OP microbiome**

443 All filtered reads of the OP microbiota were aligned to the RMGC using BWA with  
444 same parameters as described above. The relative abundance of each phylogenetic  
445 assignment was calculated as shown above, while the abundance of KOs in the  
446 functional profiling table was determined as described in a previous report [59].

447

#### 448 **Identification of core OP microbial species in healthy children**

449 Microbial species were selected as ‘core’ species if they existed in more than 50% of  
450 healthy children and had more than 1% relative abundance in one OP microbial  
451 sample. Distributions of core microbial species in the OP of healthy children were

452 described using ggplot2 in R.

453

454 **Comparison of the OP microbiota between healthy children and children with**

455 **MPP**

456 Thirty-three healthy children were chosen, with a similar age distribution to that of

457 the 34 children with MPP (data size  $\geq 650$  Mbp). Genes in the OP microbiota of

458 selected microbial samples were clustered into co-abundance gene groups (CAGs) via

459 Capony-based algorithms [72] (default parameters). Selected CAGs containing more

460 than 700 genes were regarded as being derived from the same bacterial genome and

461 were selected to construct a correlation network using Spearman's rank coefficient

462 ( $\leq -0.6$  or  $\geq 0.6$ ). The co-occurrence network was visualized using Cytoscape (v3.4.0)

463 [73]. If  $\geq 50\%$  of the included genes had consensus phylogenetic annotations, the

464 corresponding CAG was assigned to a related microbial taxonomic assignment.

465 The relative abundance of each CAG in our microbial samples was calculated as

466 previously reported [60]. Intergroup comparisons between CAGs and KEGG

467 functions were performed using the two-tailed Wilcoxon rank-sum test and corrected



468 via the Benjamini-Hochberg method (adjusted  $P$ -value  $\leq 0.05$ ). Confounding factors  
469 including pneumonia, sex, age, delivery mode and feed pattern were also assessed  
470 using permutational analysis of variance (PERMANOVA) by vegan package (v2.3-4)  
471 in R.

472

### 473 **Single microbial genome assembly from OP metagenomic data**

474 OP metagenomic data were aligned to the filtered CAGs (those containing  $\geq 700$  genes)  
475 by BWA (v0.7.13, identity  $\geq 95\%$ ). The mapped reads of each CAG were extracted for  
476 microbial genome assembly with Velvet [74] (Velvet, RRID:SCR\_010755, kmer:  
477 from 45 to 75, cov\_cutoff: auto, exp\_cov: auto). The assembled sequences with the  
478 longest contig N50 were selected as representative draft genomes. Assembly quality  
479 was assessed using the following six criteria [24]: (i) 90% of the genome assembly  
480 included in contigs  $> 500$  bp; (ii) 90% of the assembled bases at  $> 5\times$  read coverage;  
481 (iii) contig N50  $> 5$  kb; (iv) scaffold N50  $> 20$  kb; (v) average contig length  $> 5$  kb; and  
482 (vi)  $> 90\%$  of core genes present in the assembly. Fourteen draft microbial genomes  
483 passed five or six of these criteria (Supplementary Table 3). The assembly quality

484 estimation standard published by the Genomic Standards Consortium (GSC) was then  
485 applied (Supplementary Table 3) [75]. The microbial species designation of 14  
486 assembled genome sequences followed these standards: 1) concordance with  
487 taxonomical assignment of CAGs [72]; 2) aligned to the genome sequences published  
488 by IMG, NCBI and PATRIC via BLASTN (v2.5.0, default parameters except  $-e$  0.01),  
489 with  $\geq 95\%$  nucleotide identity and  $\geq 95\%$  genome coverage; and 3) assigned by  
490 CheckM (CheckM, RRID:SCR\_016646, v1.0.12, default parameters) from the  
491 Genome Taxonomy database [76]. Furthermore, gene prediction was executed with  
492 Glimmer3.02 (Glimmer, RRID:SCR\_011931), while related annotations of antibiotic  
493 resistance and virulence genes were acquired through CARD [77] and VFDB [78].  
494 The SNP mutation associated with macrolide resistance of *M. pneumoniae* was  
495 identified by mapping sequencing reads against 23S rRNA genes [79] using BWA.

496

497 **Correlations between reassembled microbial genomes and disease severity in**  
498 **MPP patients**

499 The correlation between reconstructed microbial genomes and hospitalization

500 duration and fever peak was assessed using R software, as well as serum CRP, PCT  
501 and eosinophil levels at 24 hours after hospitalization. The distributions of relative  
502 abundance of 14 reassembled genomes in children with MPP and healthy children were  
503 shown via scatter plot.

504

#### 505 **Availability of supporting data and materials**

506 The BioProject ID for this study is PRJNA413615. The sequencing data supporting  
507 the results of this article are available in the GenBank repository under accession  
508 number SRP119571. The gene profiles are freely accessible on RMGC database [20].

509 All supporting data and materials are available in the *GigaScience* GigaDB database  
510 [80].

511

#### 512 **Declarations**

#### 513 **List of abbreviations**

514 AdV, Adenovirus; ARI, Acute respiratory infection; BALF, Broncho-alveolar lavage  
515 fluid; CAG, Co-abundance gene group; CMV, Cytomegalovirus; EBV, Epstein–Barr

516 virus; GM, Gut microbiome; KEGG: Kyoto Encyclopedia of Genes and Genomes;  
517 KO, KEGG orthologous group; MCL, Markov cluster algorithm; NP, Nasopharynx;  
518 OP, Oropharynx; ORF, Open reading frame; PCA, Principal component analysis; PCR,  
519 Polymerase chain reaction; PERMANOVA, Permutational multivariate analysis of  
520 variance analysis; PP, Paediatric pneumonia; RM, Respiratory microbiome; RMGC,  
521 Respiratory microbial gene catalogue; RSV, Respiratory syncytial virus.

522

### 523 **Ethics approval**

524 Ethical approval for this study was obtained from the Ethical Committee of Shenzhen  
525 Children's Hospital (Shenzhen, Guangdong Province, China) under registration  
526 number 2016013. All experiments were performed under the relevant guidelines and  
527 regulations. Guardians of all children included in this study provided their informed  
528 consent to participate.

529

### 530 **Consent for publication**

531 All authors have given their consent to publish the manuscript.

532

533 **Competing interests**

534 The authors declare no that they have no competing interests.

535

536 **Funding**

537 This study was supported by grants from the Key Medical Disciplines Building

538 Project of Shenzhen (grant number SZXJ2017005), the Sanming Project of Medicine

539 in Shenzhen (grant number SZSM201512030), the Shenzhen Science and Technology

540 Project (grant numbers JCYJ20170303155012371 and JCYJ20170816170527583),

541 and the Guangdong Medical Research Fund (grant number A2017213).

542

543 **Author contributions**

544 Y.Z., Y.Y. and K.Z. managed the project. Z.L., G.X. and Y.B. collected samples and

545 information. W.W. and Q.Y. prepared the DNA extraction. D.L., Q.Z., X.F. and Z.Y.

546 performed the bioinformatics analysis. C.Q., Y.L. and Y.L. optimized the graphs. X.X.

547 and M.L. optimized the data curation. S.L. and Y.Y. guided data interpretation. X.F.

548 developed the website. H.W. and W.D. mined the data and wrote the paper. K.S. and  
549 K.Y. polished the article. All authors read and approved the final version of the  
550 manuscript.

551

## 552 **Acknowledgements**

553 We thank members of the Collaborating Group of Pediatric Respiratory Microbiome,  
554 Chinese Pediatric Society and Chinese Medical Association, for their suggestions.

555

## 556 **Author information**

557 Y.Y. is a Russian academician of paediatric and vaccine research. Y.Z is Director of  
558 the Respiratory Disease Department at Shenzhen Children's Hospital, China. S.L is a  
559 professor in the Department of Computer Science at the City University of Computer  
560 Science, Hong Kong. K.Z is a professor at Wuhan National Laboratory for  
561 Optoelectronics, Huazhong University of Science and Technology, China.

562

## 563 **References**

- 564 1. Stearns JC, Davidson CJ, McKeon S, Whelan FJ, Fontes ME, Schryvers AB,  
565 *et al.* Culture and molecular-based profiles show shifts in bacterial  
566 communities of the upper respiratory tract that occur with age. *ISME J.* 2015;  
567 9: 1268.
- 568 2. Biesbroek G, Tsivtsivadze E, Sanders EA, Montijn R, Veenhoven RH, Keijser  
569 BJ, *et al.* Early respiratory microbiota composition determines bacterial  
570 succession patterns and respiratory health in children. *Am J Respir Crit Care*  
571 *Med.* 2014; 190: 1283-92.
- 572 3. Biesbroek G, Bosch AA, Wang X, Keijser BJ, Veenhoven RH, Sanders EA, *et*  
573 *al.* The impact of breastfeeding on nasopharyngeal microbial communities in  
574 infants. *Am J Respir Crit Care Med.* 2014; 190: 298-308.
- 575 4. Bosch AA, de Steenhuijsen Piters WA, van Houten MA, Chu M, Biesbroek G,  
576 Kool J, *et al.* Maturation of the infant respiratory microbiota, environmental  
577 drivers and health consequences: a prospective cohort study. *Am J Respir Crit*  
578 *Care Med.* 2017; 196: 1582-90.
- 579 5. Charlson ES, Bittinger K, Haas AR, Fitzgerald AS, Frank I, Yadav A, *et al.*

- 580 Topographical continuity of bacterial populations in the healthy human  
581 respiratory tract. *Am J Respir Crit Care Med.* 2011; 184: 957-63.
- 582 6. de Steenhuijsen Piters WA, Huijskens EG, Wyllie AL, Biesbroek G, van den  
583 Bergh MR, Veenhoven RH, *et al.* Dysbiosis of upper respiratory tract  
584 microbiota in elderly pneumonia patients. *ISME J.* 2016; 10: 97-108.
- 585 7. Sakwinska O, Bastic Schmid V, Berger B, Bruttin A, Keitel K, Lepage M, *et al.*  
586 Nasopharyngeal microbiota in healthy children and pneumonia patients. *J Clin*  
587 *Microbiol.* 2014; 52: 1590-4.
- 588 8. Prina E, Ranzani OT, Torres A. Community-acquired pneumonia. *Lancet.*  
589 2015; 386: 1097-108.
- 590 9. Musher DM, Thorner AR. Community-acquired pneumonia. *N Engl J Med.*  
591 2014; 371: 1619-28.
- 592 10. Liu L, Oza S, Hogan D, Perin J, Rudan I, Lawn JE, *et al.* Global, regional, and  
593 national causes of child mortality in 2000-13, with projections to inform  
594 post-2015 priorities: an updated systematic analysis. *Lancet.* 2015; 385:  
595 430-40.



- 596 11. Dagan R, Bhutta ZA, de Quadros CA, Garau J, Klugman KP, Khuri-Bulos N,  
597 *et al.* The remaining challenge of pneumonia: the leading killer of children.  
598 *Pediatr Infect Dis J.* 2011; 30: 1-2.
- 599 12. Qin Q, Baoping Xu, Liu X, Shen K. Status of *Mycoplasma pneumoniae*  
600 pneumonia in chinese children: a systematic review. *Advances in*  
601 *Microbiology.* 2014; 4: 704-11.
- 602 13. Lu Z, Dai W, Liu Y, Zhou Q, Wang H, Li D, *et al.* The alteration of  
603 nasopharyngeal and oropharyngeal microbiota in children with MPP and  
604 non-MPP. *Genes (Basel).* 2017; 8.
- 605 14. Dai W, Wang H, Zhou Q, Feng X, Lu Z, Li D, *et al.* The concordance between  
606 upper and lower respiratory microbiota in children with *Mycoplasma*  
607 *pneumoniae* pneumonia. *Emerg Microbes Infect.* 2018; 7: 92.
- 608 15. Hasegawa K, Mansbach JM, Ajami NJ, Espinola JA, Henke DM, Petrosino JF,  
609 *et al.* Association of nasopharyngeal microbiota profiles with bronchiolitis  
610 severity in infants hospitalised for bronchiolitis. *Eur Respir J.* 2016; 48:  
611 1329-39.

- 612 16. de Steenhuijsen Piters WA, Heinonen S, Hasrat R, Bunsow E, Smith B,  
613 Suarez-Arrabal MC, *et al.* Nasopharyngeal microbiota, host transcriptome,  
614 and disease severity in children with respiratory syncytial virus infection. *Am*  
615 *J Respir Crit Care Med.* 2016; 194: 1104-15.
- 616 17. Pettigrew MM, Gent JF, Kong Y, Wade M, Gansebom S, Bramley AM, *et al.*  
617 Association of sputum microbiota profiles with severity of  
618 community-acquired pneumonia in children. *BMC Infect Dis.* 2016; 16: 317.
- 619 18. Vissing NH, Chawes BL, Bisgaard H. Increased risk of pneumonia and  
620 bronchiolitis after bacterial colonization of the airways as neonates. *Am J*  
621 *Respir Crit Care Med.* 2013; 188: 1246-52.
- 622 19. Mika M, Mack I, Korten I, Qi W, Aebi S, Frey U, *et al.* Dynamics of the nasal  
623 microbiota in infancy: a prospective cohort study. *J Allergy Clin Immunol.*  
624 2015; 135: 905-12.e11.
- 625 20. The Respiratory Microbial Gene Catalogue database.  
626 <https://rmgc.deepomics.org>. Accessed 2017
- 627 21. Zhang R, Wang H, Deng J. A 4-Year-Old Girl With Progressive Cough and

- 628 Abnormal Blood Smear. *Clinical Infectious Diseases*. 2017; 64: 1630–31.
- 629 22. Li J, Jia H, Cai X, Zhong H, Feng Q, Sunagawa S, *et al*. An integrated catalog  
630 of reference genes in the human gut microbiome. *Nat Biotechnol*. 2014; 32:  
631 834-41.
- 632 23. Qin J, Li Y, Cai Z, Li S, Zhu J, Zhang F, *et al*. A metagenome-wide association  
633 study of gut microbiota in type 2 diabetes. *Nature*. 2012; 490: 55-60.
- 634 24. Zhang C, Yin A, Li H, Wang R, Wu G, Shen J, *et al*. Dietary modulation of gut  
635 microbiota contributes to alleviation of both genetic and simple obesity in  
636 children. *EBioMedicine*. 2015; 2: 968-84.
- 637 25. Rosas-Salazar C, Shilts MH, Tovchigrechko A, Schobel S, Chappell JD,  
638 Larkin EK, *et al*. Differences in the nasopharyngeal microbiome during acute  
639 respiratory tract infection with human rhinovirus and respiratory syncytial  
640 virus in infancy. *J Infect Dis*. 2016; 214: 1924-28.
- 641 26. Stewart CJ, Mansbach JM, Wong MC, Ajami NJ, Petrosino JF, Camargo CAJ,  
642 *et al*. Associations of nasopharyngeal metabolome and microbiome with  
643 severity among infants with bronchiolitis: a multi-omic analysis. *Am J Respir*

- 644 Crit Care Med. 2017; 196: 882-91.
- 645 27. Quinn RA. Integrating microbiome and metabolome data to understand  
646 infectious airway disease. Am J Respir Crit Care Med. 2017; 196: 806-07.
- 647 28. Yang J, Hooper WC, Phillips DJ, Talkington DF. Cytokines in Mycoplasma  
648 pneumoniae infections. Cytokine Growth Factor Rev. 2004; 15: 157-68.
- 649 29. Peteranderl C, Sznajder JJ, Herold S, Lecuona E. Inflammatory responses  
650 regulating alveolar ion transport during pulmonary infections. Front Immunol.  
651 2017; 8: 446.
- 652 30. Miller SI, Ernst RK, Bader MW. LPS, TLR4 and infectious disease diversity.  
653 Nat Rev Microbiol. 2005; 3: 36-46.
- 654 31. Patkee WR, Carr G, Baker EH, Baines DL, Garnett JP. Metformin prevents the  
655 effects of Pseudomonas aeruginosa on airway epithelial tight junctions and  
656 restricts hyperglycaemia-induced bacterial growth. J Cell Mol Med. 2016; 20:  
657 758-64.
- 658 32. Hewitt R, Webber J, Farne H, Trujillo-Torralbo M-B, Footitt J, Molyneaux PL,  
659 *et al.* Airway glucose in virus-induced COPD exacerbations. Am J Respir Crit

- 660 Care Med. 2016; 192: A6323.
- 661 33. Garnett JP, Nguyen TT, Moffatt JD, Pelham ER, Kalsi KK, Baker EH, *et al.*  
662 Proinflammatory mediators disrupt glucose homeostasis in airway surface  
663 liquid. J Immunol. 2012; 189: 373-80.
- 664 34. Kalsi KK, Baker EH, Fraser O, Chung YL, Mace OJ, Tarelli E, *et al.* Glucose  
665 homeostasis across human airway epithelial cell monolayers: role of diffusion,  
666 transport and metabolism. Pflugers Arch. 2009; 457: 1061-70.
- 667 35. Philips BJ, Redman J, Brennan A, Wood D, Holliman R, Baines D, *et al.*  
668 Glucose in bronchial aspirates increases the risk of respiratory MRSA in  
669 intubated patients. Thorax. 2005; 60: 761-4.
- 670 36. Man WH, de Steenhuijsen Piters WA, Bogaert D. The microbiota of the  
671 respiratory tract: gatekeeper to respiratory health. Nat Rev Microbiol. 2017;  
672 15: 259-70.
- 673 37. Ji P, Zhang Y, Wang J, Zhao F. MetaSort untangles metagenome assembly by  
674 reducing microbial community complexity. Nat Commun. 2017; 8: 14306.
- 675 38. Olm MR, Brown CA-O, Brooks B, Banfield JF. dRep: a tool for fast and

- 676 accurate genomic comparisons that enables improved genome recovery from  
677 metagenomes through de-replication. ISME J. 2017; 11: 2864-68.
- 678 39. Saraya T, Kurai D, Nakagaki K, Sasaki Y, Niwa S, Tsukagoshi H, *et al.* Novel  
679 aspects on the pathogenesis of *Mycoplasma pneumoniae* pneumonia and  
680 therapeutic implications. Front Microbiol. 2014; 5: 410.
- 681 40. Floss HG, Yu TW. Rifamycin-mode of action, resistance, and biosynthesis.  
682 Chem Rev. 2005; 105: 621-32.
- 683 41. Nesar S, MH. S, Rahim N, Rehman R. Emergence of resistance to  
684 fluoroquinolones among gram positive and gram negative clinical isolates.  
685 Pak J Pharm Sci. 2012; 25: 877-81.
- 686 42. Axelsen PH. A chaotic pore model of polypeptide antibiotic action. Biophys J.  
687 2008; 94: 1549-50.
- 688 43. Harris M, Clark J, Coote N, Fletcher P, Harnden A, McKean M, *et al.* British  
689 Thoracic Society guidelines for the management of community acquired  
690 pneumonia in children: update 2011. Thorax. 2011; 66 Suppl 2: ii1-23.
- 691 44. Bradley JS, Byington CL, Shah SS, Alverson B, Carter ER, Harrison C, *et al.*

- 692 The management of community-acquired pneumonia in infants and children  
693 older than 3 months of age: clinical practice guidelines by the Pediatric  
694 Infectious Diseases Society and the Infectious Diseases Society of America.  
695 Clin Infect Dis. 2011; 53: e25-76.
- 696 45. Lee H, Yun KW, Lee HJ, Choi EH. Antimicrobial therapy of  
697 macrolide-resistant *Mycoplasma pneumoniae* pneumonia in children. Expert  
698 Rev Anti Infect Ther. 2018; 16: 23-34.
- 699 46. Hasegawa K, Mansbach JM, Ajami NJ, Espinola JA, Henke DM, Petrosino JF,  
700 *et al.* Association of nasopharyngeal microbiota profiles with bronchiolitis  
701 severity in infants hospitalised for bronchiolitis. Eur Respir J. 2016; 48:  
702 1329-39.
- 703 47. Hasegawa K, Linnemann RW, Mansbach JM, Ajami NJ, Espinola JA,  
704 Petrosino JF, *et al.* Nasal airway microbiota profile and severe bronchiolitis in  
705 infants: a case-control study. Pediatr Infect Dis J. 2017; 36: 1044-51.
- 706 48. Citti C, Dordet-Frisoni E, Nouvel LX, Kuo CH, Baranowski E. Horizontal  
707 gene transfers in *Mycoplasmas* (Mollicutes). Curr Issues Mol Biol. 2018; 29:

708 3-22.

709 49. Xiao L, Ptacek T, Osborne JD, Crabb DM, Simmons WL, Lefkowitz EJ, *et al.*

710 Comparative genome analysis of *Mycoplasma pneumoniae*. *BMC Genomics*.

711 2015; 16: 610.

712 50. Rohde H, Qin J, Cui Y, Li D, Loman NJ, Hentschke M, *et al.* Open-source

713 genomic analysis of Shiga-toxin-producing *E. coli* O104:H4. *N Engl J Med*.

714 2011; 365: 718-24.

715 51. Davies MR, Holden MT, Coupland P, Chen JH, Venturini C, Barnett TC, *et al.*

716 Emergence of scarlet fever *Streptococcus pyogenes* emm12 clones in Hong

717 Kong is associated with toxin acquisition and multidrug resistance. *Nat Genet*.

718 2015; 47: 84-7.

719 52. Kutty PK, Jain S, Taylor TH, Bramley AM, Diaz MH, Ampofo K, *et al.*

720 *Mycoplasma pneumoniae* among children hospitalized with

721 community-acquired pneumonia. *Clin Infect Dis*. 2019; 68: 5-12.

722 53. Blyth CC, Gerber JS. Macrolides in children with community-acquired

723 pneumonia: panacea or placebo? *J Pediatric Infect Dis Soc*. 2018; 7: 71-77.



- 724 54. Yang D, Chen L, Chen ZA-O. The timing of azithromycin treatment is not  
725 associated with the clinical prognosis of childhood *Mycoplasma pneumoniae*  
726 pneumonia in high macrolide-resistant prevalence settings. *PLoS One*. 2018;  
727 13: e0191951.
- 728 55. Larsen JM, Musavian HS, Butt TM, Ingvorsen C, Thyssen AH, Brix S. Chronic  
729 obstructive pulmonary disease and asthma-associated Proteobacteria, but not  
730 commensal *Prevotella* spp., promote Toll-like receptor 2-independent lung  
731 inflammation and pathology. *Immunology*. 2015; 144: 333-42.
- 732 56. Segal LN, Clemente JC, Tsay JC, Koralov SB, Keller BC, Wu BG, *et al.*  
733 Enrichment of the lung microbiome with oral taxa is associated with lung  
734 inflammation of a Th17 phenotype. *Nat Microbiol*. 2016; 1: 16031.
- 735 57. de Dios Caballero J, Vida R, Cobo M, Maiz L, Suarez L, Galeano J, *et al.*  
736 Individual patterns of complexity in cystic fibrosis lung microbiota, including  
737 predator bacteria, over a 1-year period. *MBio*. 2017; 8: e00959-17.
- 738 58. Maier L, Pruteanu M, Kuhn M, Zeller G, Telzerow A, Anderson EE, *et al.*  
739 Extensive impact of non-antibiotic drugs on human gut bacteria. *Nature*. 2018;

740 555: 623-28.

741 59. Qin J, Li R, Raes J, Arumugam M, Burgdorf KS, Manichanh C, *et al.* A  
742 human gut microbial gene catalogue established by metagenomic sequencing.  
743 Nature. 2010; 464: 59-65.

744 60. Lloyd-Price J, Mahurkar A, Rahnavard G, Crabtree J, Orvis J, Hall AB, *et al.*  
745 Strains, functions and dynamics in the expanded Human Microbiome Project.  
746 Nature. 2017; 550: 61-66.

747 61. Yan L, Yang M, Guo H, Yang L, Wu J, Li R, *et al.* Single-cell RNA-Seq  
748 profiling of human preimplantation embryos and embryonic stem cells. Nat  
749 Struct Mol Biol. 2013; 20: 1131-9.

750 62. Luo R, Liu B, Xie Y, Li Z, Huang W, Yuan J, *et al.* SOAPdenovo2: an  
751 empirically improved memory-efficient short-read de novo assembler.  
752 Gigascience. 2012; 1: 18.

753 63. Zhu W, Lomsadze A, Borodovsky M. Ab initio gene identification in  
754 metagenomic sequences. Nucleic Acids Res. 2010; 38: e132.

755 64. Delcher AL, Bratke KA, Powers EC, Salzberg SL. Identifying bacterial genes

756 and endosymbiont DNA with Glimmer. *Bioinformatics*. 2007; 23: 673-9.

757 65. Integrated Microbial Genomes and Microbiomes (IMG) database.  
758 <https://img.jgi.doe.gov/>. Accessed 21 Dec 2016.

759 66. Pathosystems Resource Integration Center (PATRIC) database.  
760 <https://www.patricbrc.org/>. Accessed 25 Mar 2017.

761 67. Human Microbiome Project (HMP). <https://portal.hmpdacc.org/>. Accessed 20  
762 Oct 2016.

763 68. Li W, Godzik A. Cd-hit: a fast program for clustering and comparing large sets  
764 of protein or nucleotide sequences. *Bioinformatics*. 2006; 22: 1658-9.

765 69. National Center for Biotechnology Information (NCBI) NT database.  
766 <ftp://ftp.ncbi.nlm.nih.gov/>. Accessed 17 Aug 2016.

767 70. Enright AJ, Van Dongen S, Ouzounis CA. An efficient algorithm for  
768 large-scale detection of protein families. *Nucleic Acids Res*. 2002; 30:  
769 1575-84.

770 71. Chao A. Estimating the population size for capture-recapture data with  
771 unequal catchability. *Biometrics*. 1987; 43: 783-91.

- 772 72. Nielsen HB, Almeida M, Juncker AS, Rasmussen S, Li J, Sunagawa S, *et al.*  
773 Identification and assembly of genomes and genetic elements in complex  
774 metagenomic samples without using reference genomes. *Nat Biotechnol.* 2014;  
775 32: 822-8.
- 776 73. Shannon P, Markiel A, Ozier O, Baliga NS, Wang JT, Ramage D, *et al.*  
777 Cytoscape: a software environment for integrated models of biomolecular  
778 interaction networks. *Genome Res.* 2003; 13: 2498-504.
- 779 74. Zerbino DR, Birney E. Velvet: algorithms for de novo short read assembly  
780 using de Bruijn graphs. *Genome Res.* 2008; 18: 821-9.
- 781 75. Bowers RM, Kyrpides NC, Stepanauskas R. Minimum information about a  
782 single amplified genome (MISAG) and a metagenome-assembled genome  
783 (MIMAG) of bacteria and archaea. 2017; 35: 725-31.
- 784 76. Parks DH, Chuvochina M, Waite DW, Rinke C, Skarshewski A, Chaumeil PA,  
785 *et al.* A standardized bacterial taxonomy based on genome phylogeny  
786 substantially revises the tree of life. *Nat Biotechnol.* 2018; 36: 996-1004.
- 787 77. Jia B, Raphenya AR, Alcock B, Waglechner N, Guo P, Tsang KK, *et al.* CARD

788 2017: expansion and model-centric curation of the comprehensive antibiotic  
789 resistance database. *Nucleic Acids Res.* 2017; 45: D566-D73.

790 78. Chen L, Zheng D, Liu B, Yang J, Jin Q. VFDB 2016: hierarchical and refined  
791 dataset for big data analysis--10 years on. *Nucleic Acids Res.* 2016; 44:  
792 D694-7.

793 79. Ji M, Lee NS, Oh JM, Jo JY, Choi EH, Yoo SJ, *et al.* Single-nucleotide  
794 polymorphism PCR for the detection of *Mycoplasma pneumoniae* and  
795 determination of macrolide resistance in respiratory samples. *J Microbiol*  
796 *Methods.* 2014; 102: 32-6.

797 80. Dai W; Wang H; Li D; Zhou Q; Feng X; Yang Z; Wang W; Qiu C; Lu Z; Xu X;  
798 Lyu M; Xie G; Li Y; Bao Y; Liu Y; Shen K; Yao K; Feng X; Yang Y; Li S;  
799 Zhou K; Zheng Y (2019): Supporting data for "The integrated respiratory  
800 microbial gene catalogue facilitate the understanding of microbial aetiology in  
801 *Mycoplasma pneumoniae pneumonia*" GigaScience Database.  
802 <http://dx.doi.org/10.5524/100620>  
803

804 **Tables**805 **Table 1.** Sample information

| Characteristics                                  | Pneumonia patients<br>(n=76) | Healthy children<br>(n=171) |
|--------------------------------------------------|------------------------------|-----------------------------|
| <b>Gender</b>                                    |                              |                             |
| Female                                           | 24                           | 87                          |
| Male                                             | 52                           | 84                          |
| <b>Age (years)</b>                               | 2.9 (0.2–12.7)               | 4.3 (0.1–8.9)               |
| <b>Sampling site</b>                             |                              |                             |
| OP                                               | 75                           | 171                         |
| NP                                               | 42                           | -                           |
| Lung                                             | 46                           | -                           |
| <b>Delivery mode</b>                             |                              |                             |
| Vaginally born                                   | 46                           | 102                         |
| Caesarean section                                | 30                           | 69                          |
| <b>Feeding pattern</b>                           |                              |                             |
| Breast                                           | 48                           | 84                          |
| Breast + milk                                    | 12                           | 66                          |
| Milk                                             | 16                           | 21                          |
| <b>Family history of allergy</b>                 | 1                            | -                           |
| <b>History of pneumonia</b>                      | 14                           | -                           |
| <b>Asthma</b>                                    | -                            | -                           |
| <b>Clinical symptoms</b>                         |                              |                             |
| Lung consolidation,<br>atelectasis, infiltration | 76                           | NA                          |
| Fever                                            | 44                           | -                           |
| Cough                                            | 72                           | -                           |
| Wheezing                                         | 20                           | -                           |
| Hospitalization time (days)                      | 9 (2–37)                     | -                           |
| CRP (<0.499 mg/l)                                | 22                           | NA                          |

|                      |    |    |
|----------------------|----|----|
| PCT (<0.5 ng/ml)     | 73 | NA |
| Eosinophils (0.5–5%) | 44 | NA |

---

806 -, no detection result; NA, not available; CRP, C-response protein; PCT, procalcitonin

807

## 808 **Figure Legends**

### 809 **Figure 1. Construction of the human Respiratory Microbial Gene Catalogue.**

810 Genome assembly was performed for each sample with  $\geq 650$  Mbp of data. For

811 samples with  $< 650$  Mbp of data, data from the same respiratory site (NP, OP or lung)

812 were mixed and assembled. Gene predictions were conducted for all assembled

813 contigs with  $\geq 500$  bp and respiratory bacterial genomes in the Integrated Microbial

814 Genomes and Microbiomes (IMG) database. Genes with  $\geq 100$  bp were retained.

815 Respiratory gene sets from the Human Microbiome Project (HMP) and Pathosystems

816 Resource Integration Center (PATRIC) were combined to construct the

817 non-redundant Respiratory Microbial Gene Catalogue (RMGC) containing 2,245,343

818 genes.

819

### 820 **Figure 2. Rarefaction curves for genes and KEGG orthologous groups/gene**

821 **families.**

822 a) Rarefaction curve for gene count.

823 b) Rarefaction curve for Chao2. The Respiratory Microbial Gene Catalogue (RMGC)

824 captured 90.52% of the prevalent genes.

825 c) Rarefaction curve for KEGG (Kyoto Encyclopedia of Genes and Genomes)

826 orthologous groups/gene families. Known functions saturate quickly to 6,346 groups.

827 After including novel gene families, the rarefaction curve plateaus when 12,924

828 groups are detected. Boxes represent the interquartile ranges (IQRs) between the first

829 and third quartiles and the line inside the box represents the median value. Whiskers

830 represent the lowest or highest values within values 1.5 times the IQR from the first

831 or third quartiles. Circles represent data points located outside of the whiskers.

832

833 **Figure 3. Core microbial species in healthy OP microbiota.**

834 Upper bar plot represents the prevalence of each core species; lower box plot shows

835 the relative abundance of each core species. Different colours refer to different phyla.

836

837 **Figure 4. Differentiation of oropharyngeal microbial samples between healthy**



838 **children and children with *Mycoplasma pneumoniae* pneumonia.**

839 a) Gene counts in the oropharyngeal (OP) microbiotas of healthy children and  
840 children with *Mycoplasma pneumoniae* pneumonia (MPP).

841 b) Alpha diversity of the OP microbiota in healthy children and children with MPP.

842 Boxes represent the interquartile ranges (IQRs) between the first and third quartiles  
843 and the line inside the box represents the median. Whiskers represent the lowest or  
844 highest values within values 1.5 times the IQR from the first or third quartiles. Points  
845 represent data located outside of the whiskers. \*\*\*  $P \leq 0.001$ .

846

847 **Figure 5. Phylogenetic and functional alterations in children with pneumonia.**

848 a) Size of the circle represents the average relative abundance of co-abundance gene  
849 groups (CAGs) in healthy children or children with *Mycoplasma pneumoniae*  
850 pneumonia (MPP). A line between two circles indicates a Spearman's rank correlation  
851 coefficient  $\geq 0.6$  and an adjusted  $P$ -value  $\leq 0.05$ . The phylum and genus corresponding  
852 to each CAG are indicated by the information listed on the left.

853 b) X-axis represents level 2 functional categories in the Kyoto Encyclopedia of Genes

854 and Genomes (KEGG); colours of the characters represent level 1 functional  
855 categories (listed on the right) Y-axis shows the relative abundance of level 2  
856 functional categories. Adjusted P-values at \*,  $\leq 0.05$ ; \*\*,  $\leq 0.01$ ; and \*\*\*,  $\leq 0.001$ ,  
857 respectively.

858

859 **Figure 6. Virulence factor genes and antibiotic resistance genes on the**  
860 ***Mycoplasma pneumoniae* genome.**

861 Tracks from outside to inside represent antibiotic resistance genes (ARGs), genes on  
862 the plus strand, genes on the negative strand and GC skew, respectively. Virulence  
863 factor genes (VFGs) painted with different colours refer to the different types of  
864 VFGs.

865

866 **Figure 7. Comparison of relative abundance of 14 re-assembled genomes**  
867 **between healthy children and children with *Mycoplasma pneumoniae* pneumonia.**

868 Blue circles and red triangles represent the microbial relative abundance of healthy  
869 children and children with *Mycoplasma pneumoniae* pneumonia (MPP). Solid dot and

870 paired whiskers represent the mean and SD of each microbial relative abundance.

871 P-values at \*,  $\leq 0.05$ ; \*\*,  $\leq 0.01$ ; and \*\*\*,  $\leq 0.001$ , respectively. NS, not significant.

Figure 1

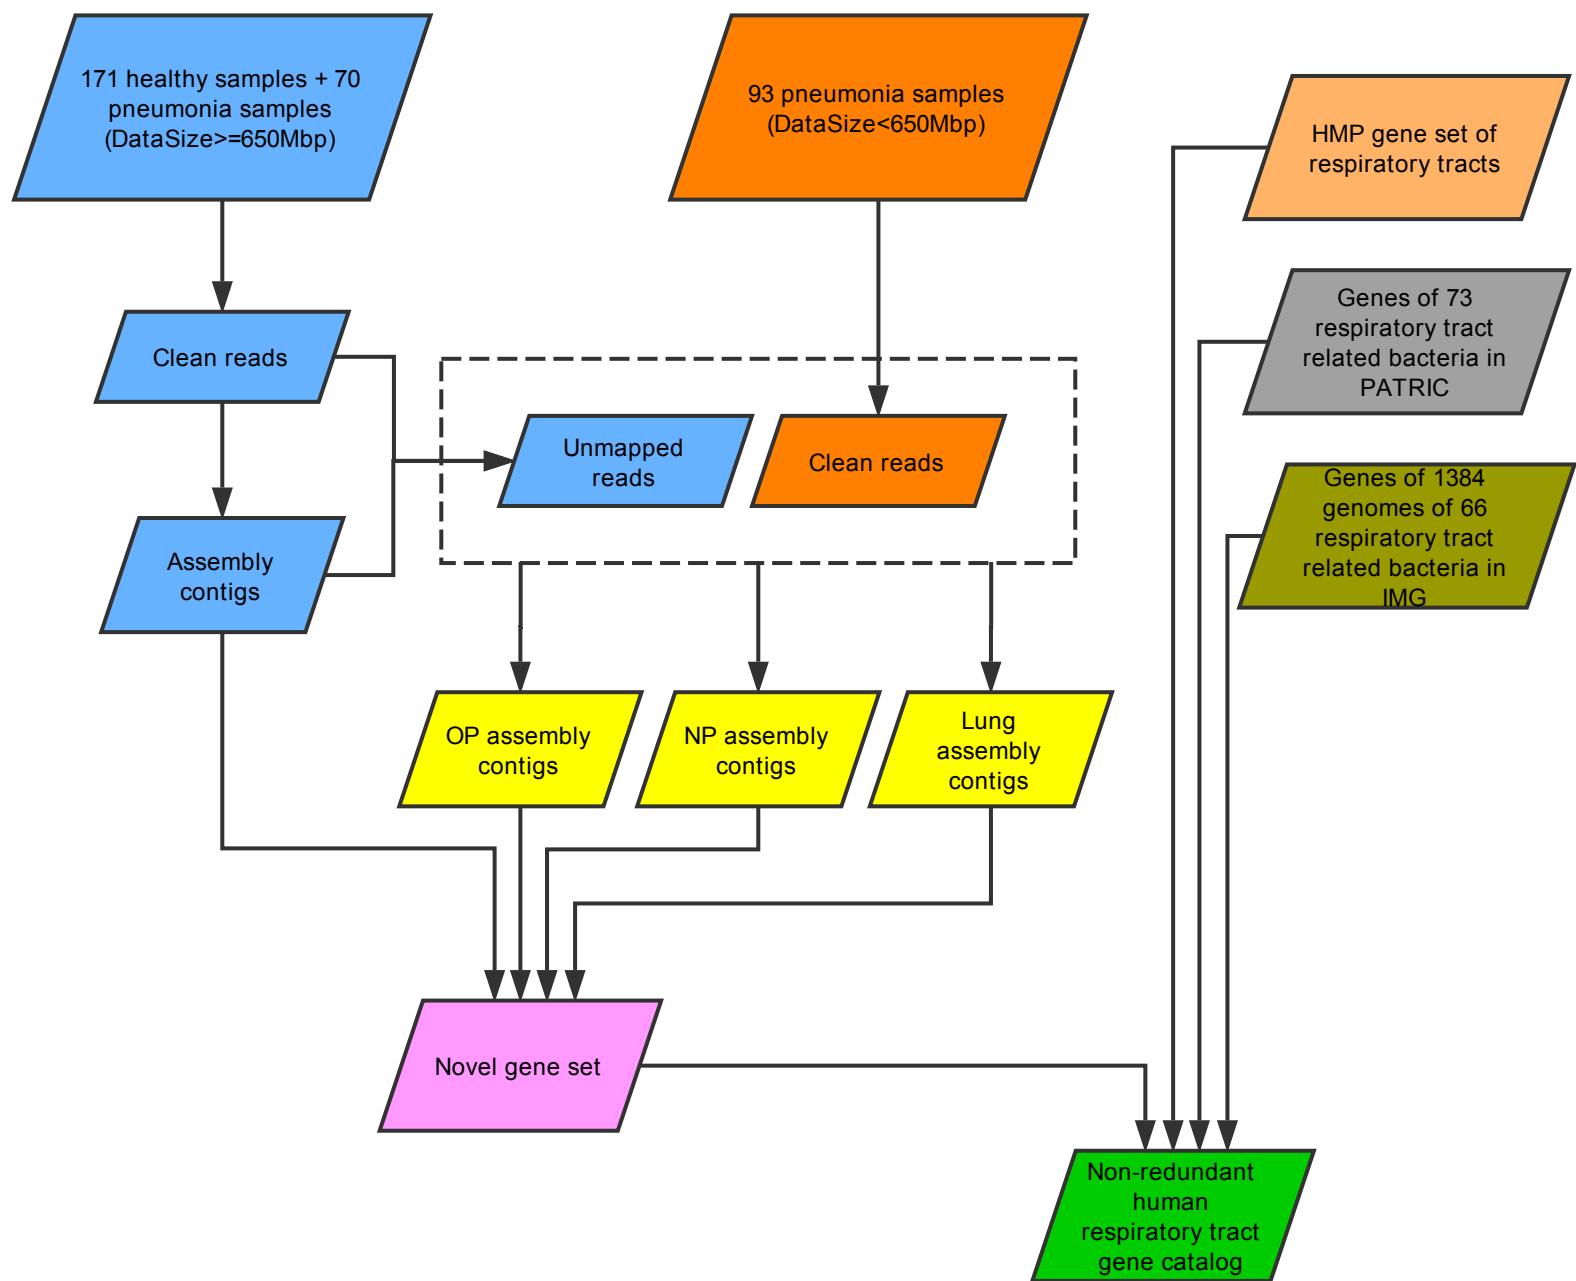

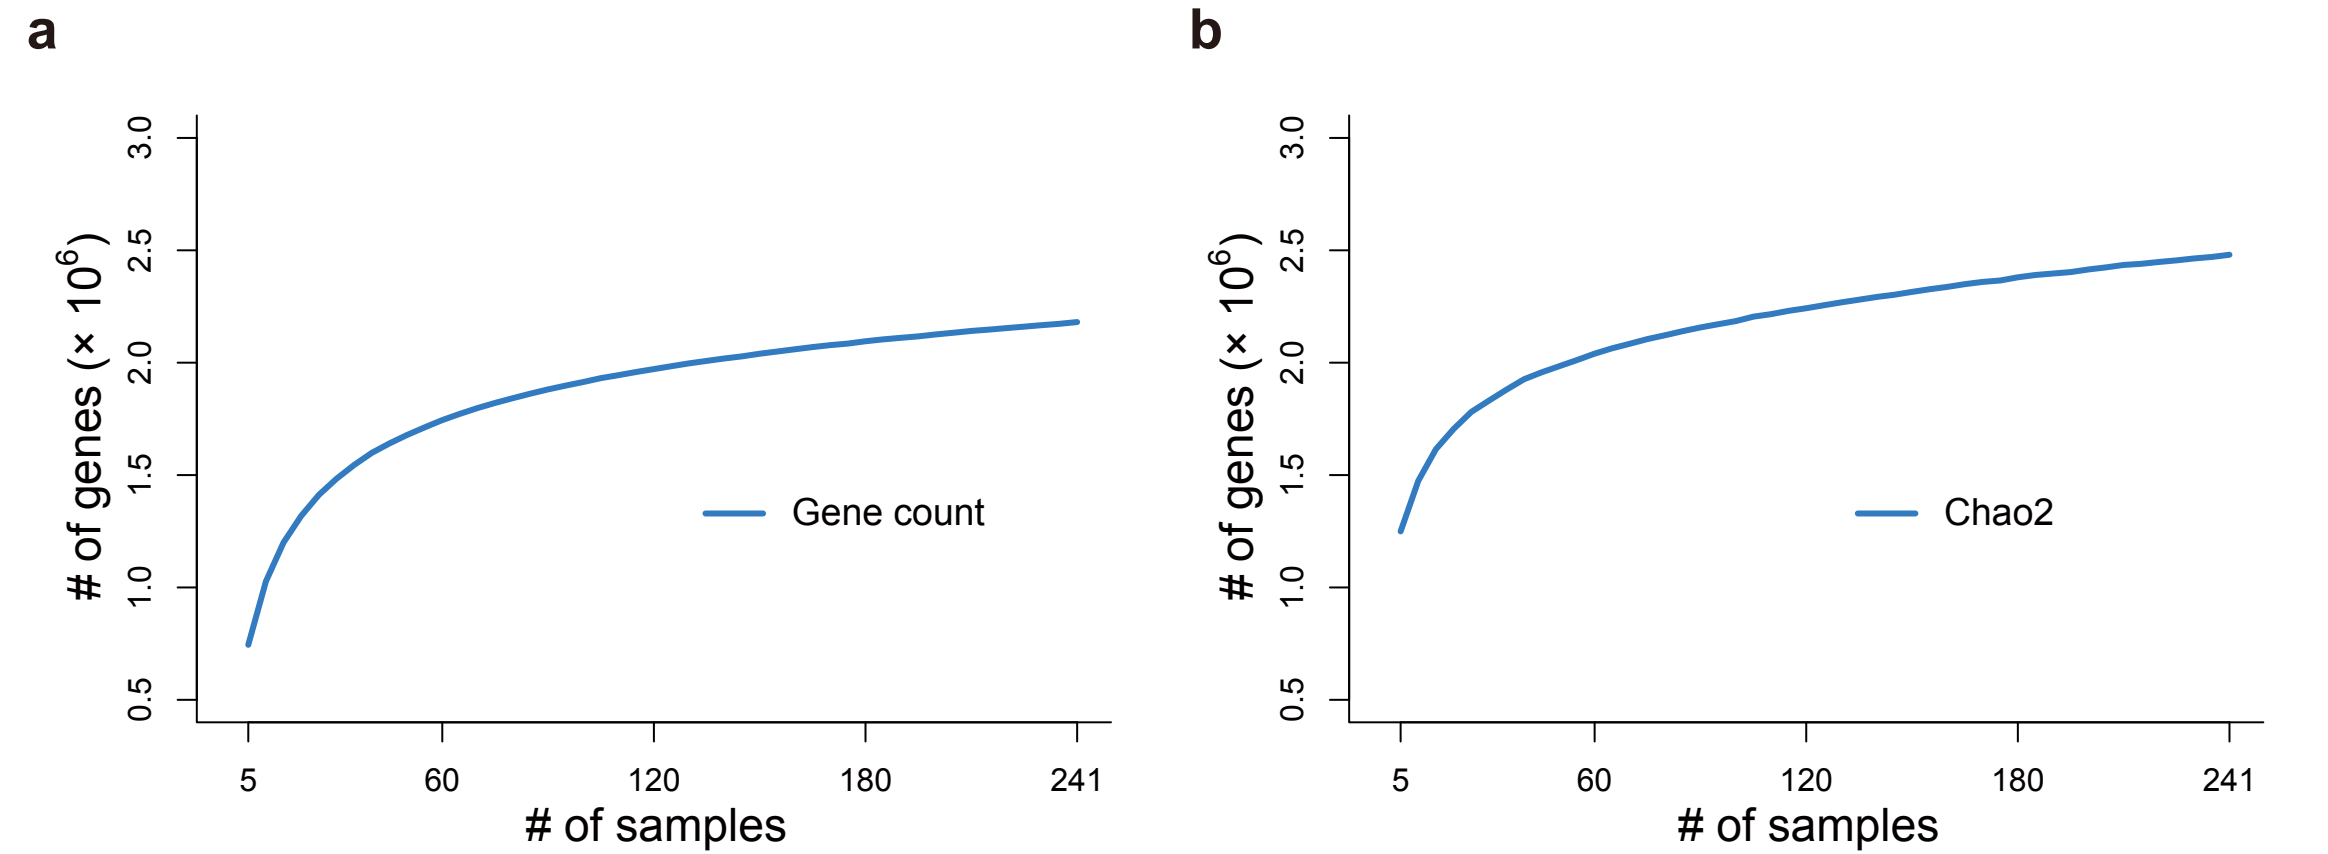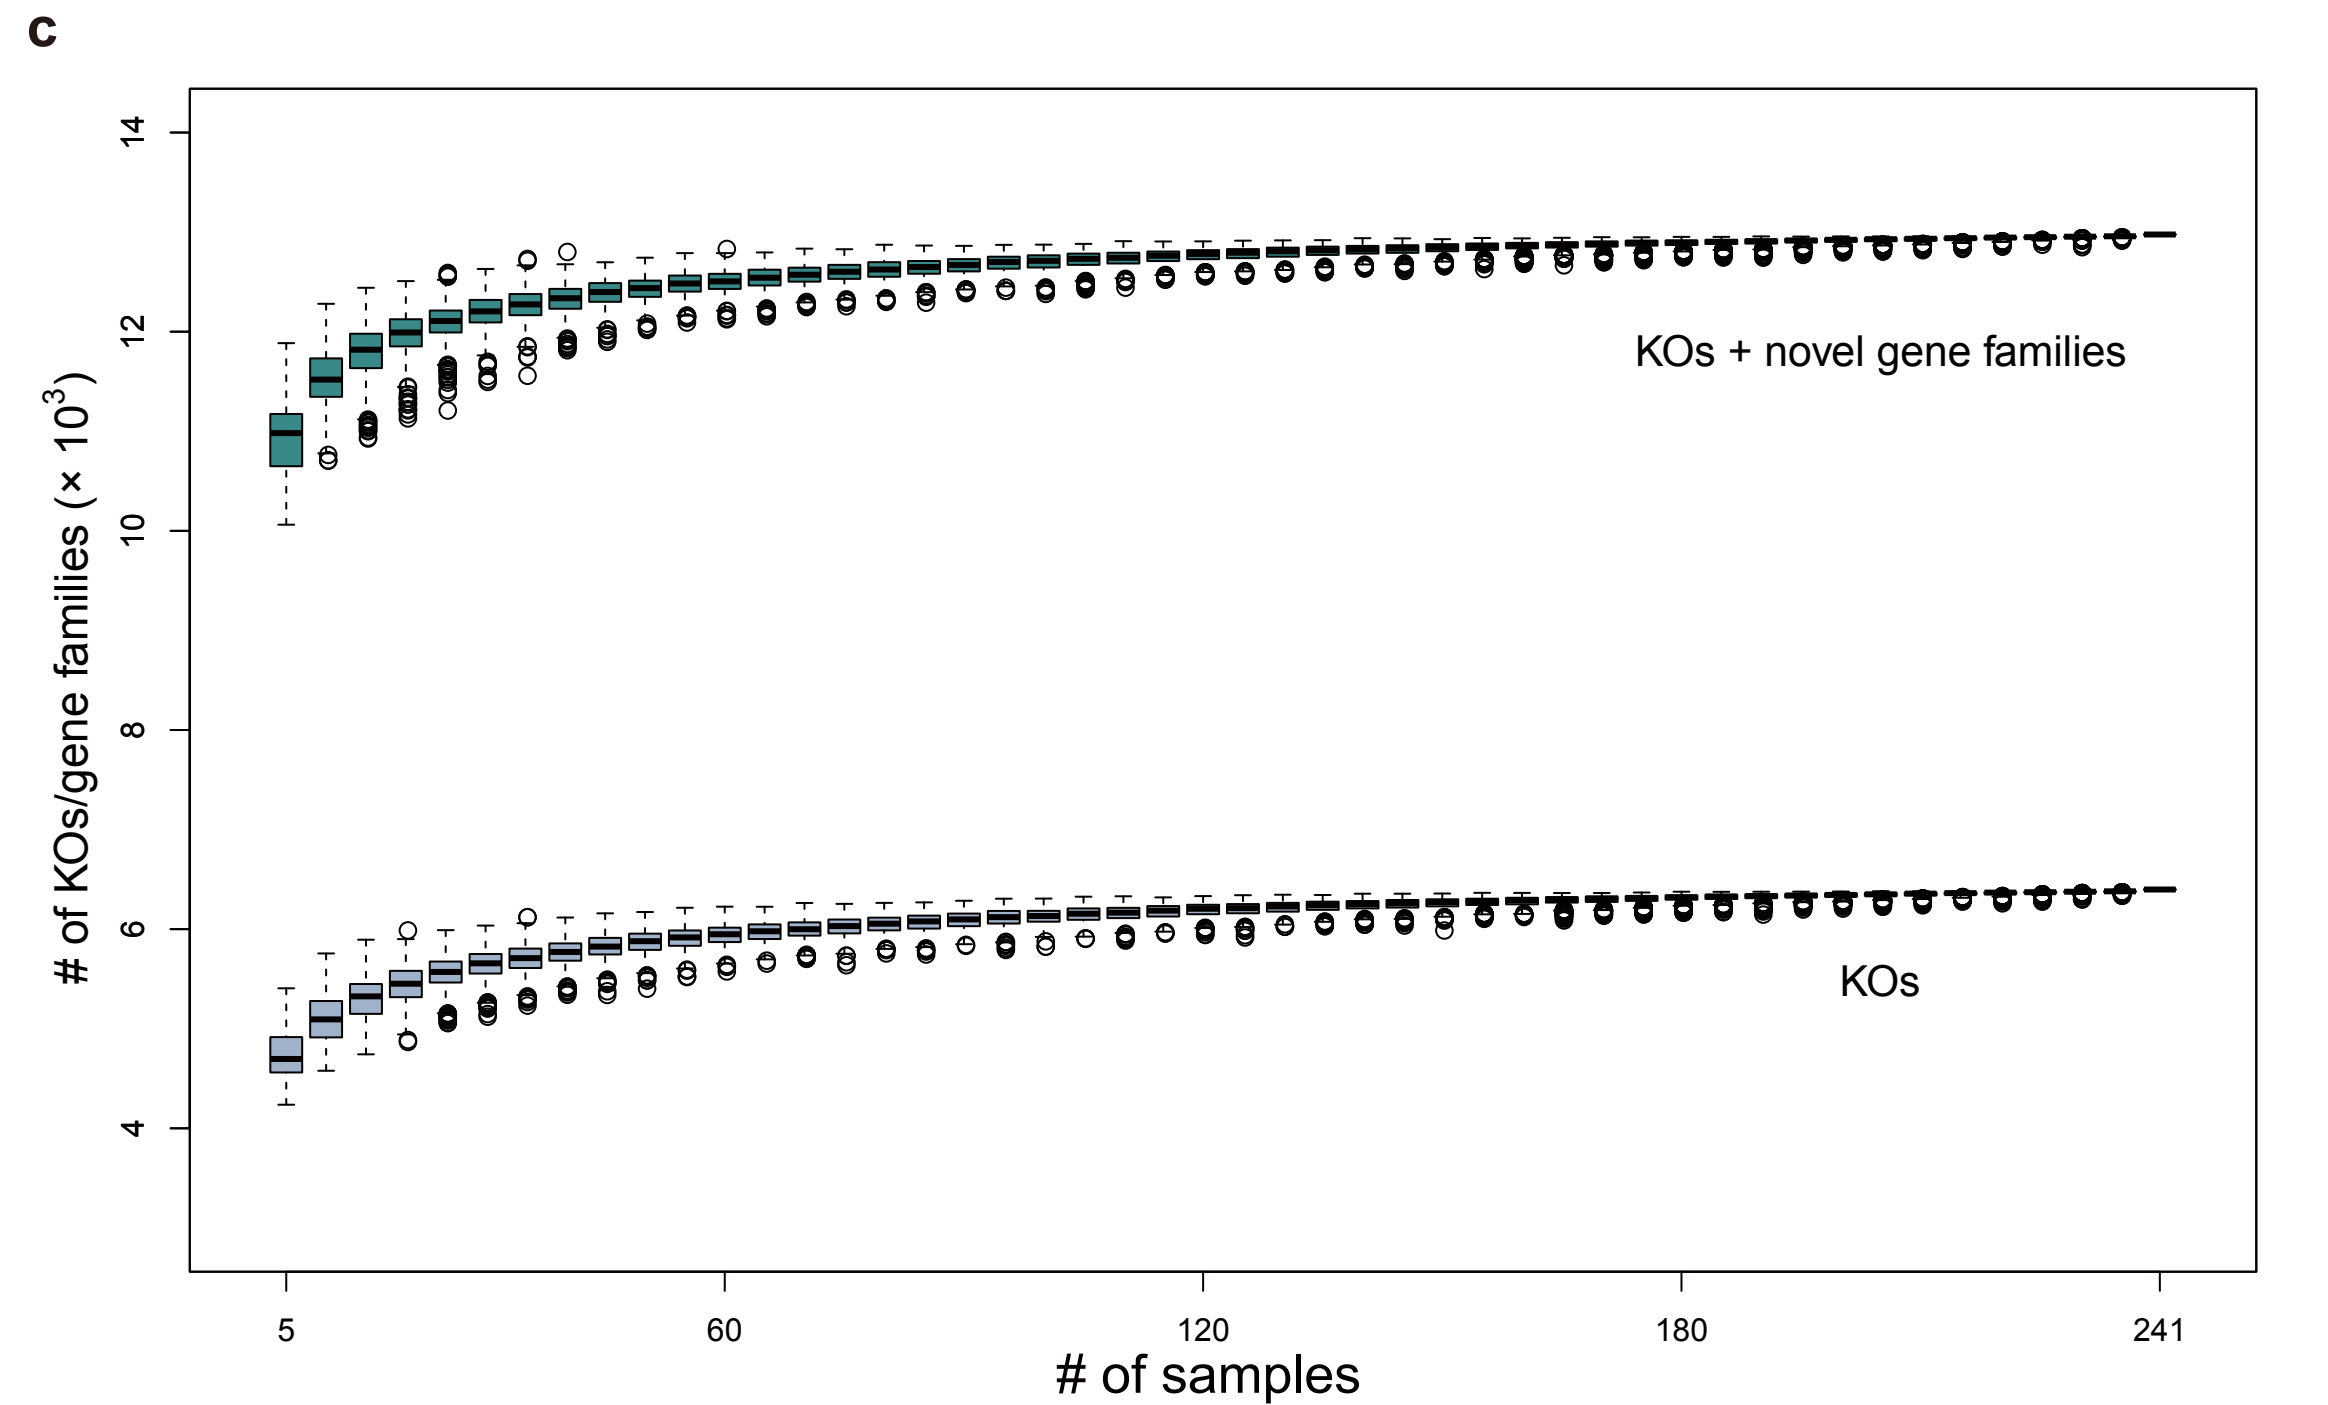

Figure 3

## Core microbial species of the healthy children's oropharynx

[Click here to access/download;Figure;Figure 3.pdf](#)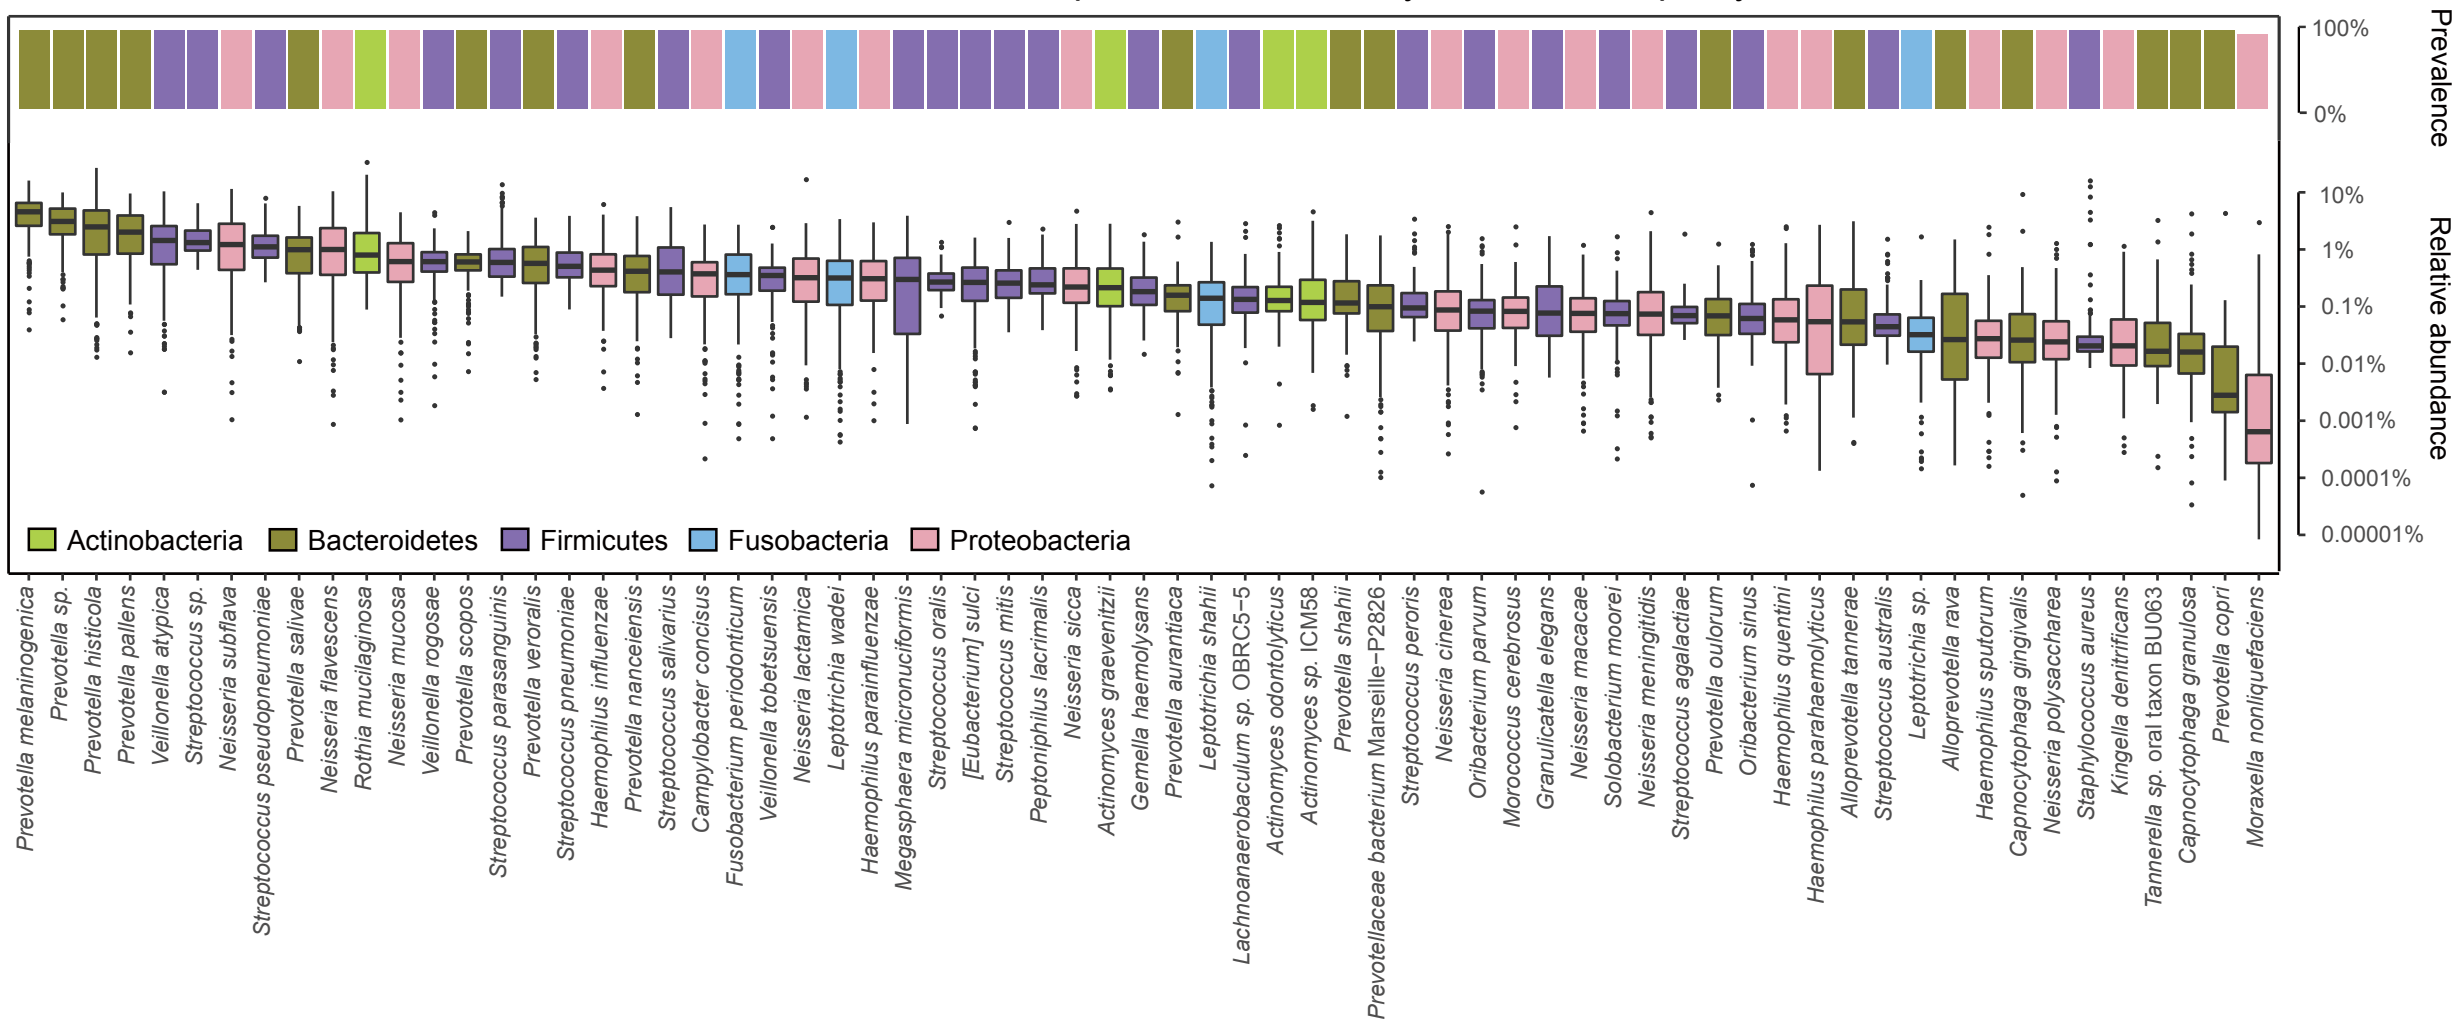

**A** Figure 4

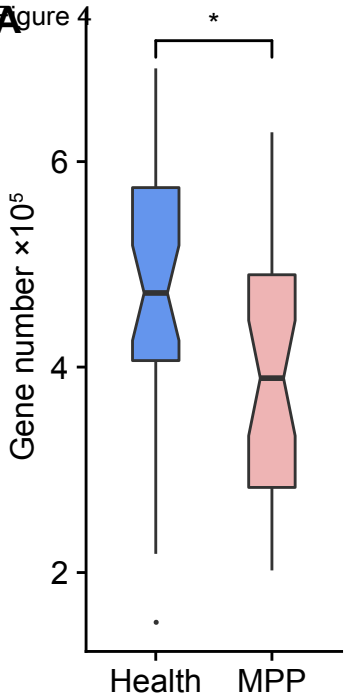

**B**

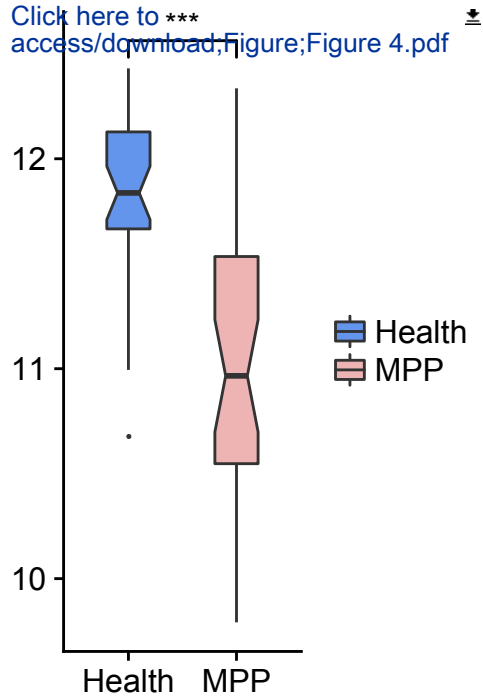

A

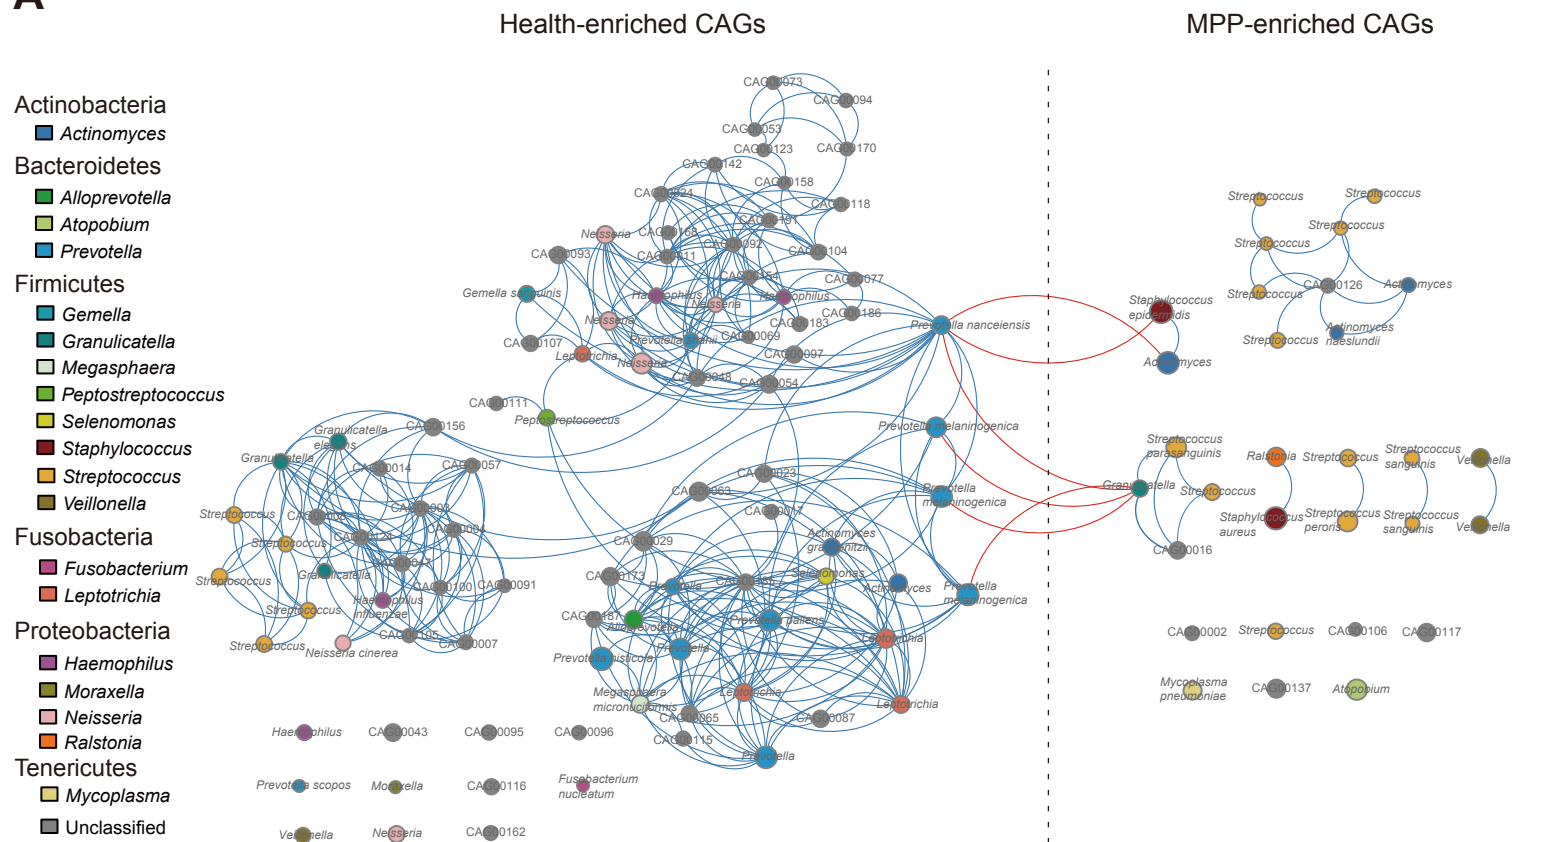

B

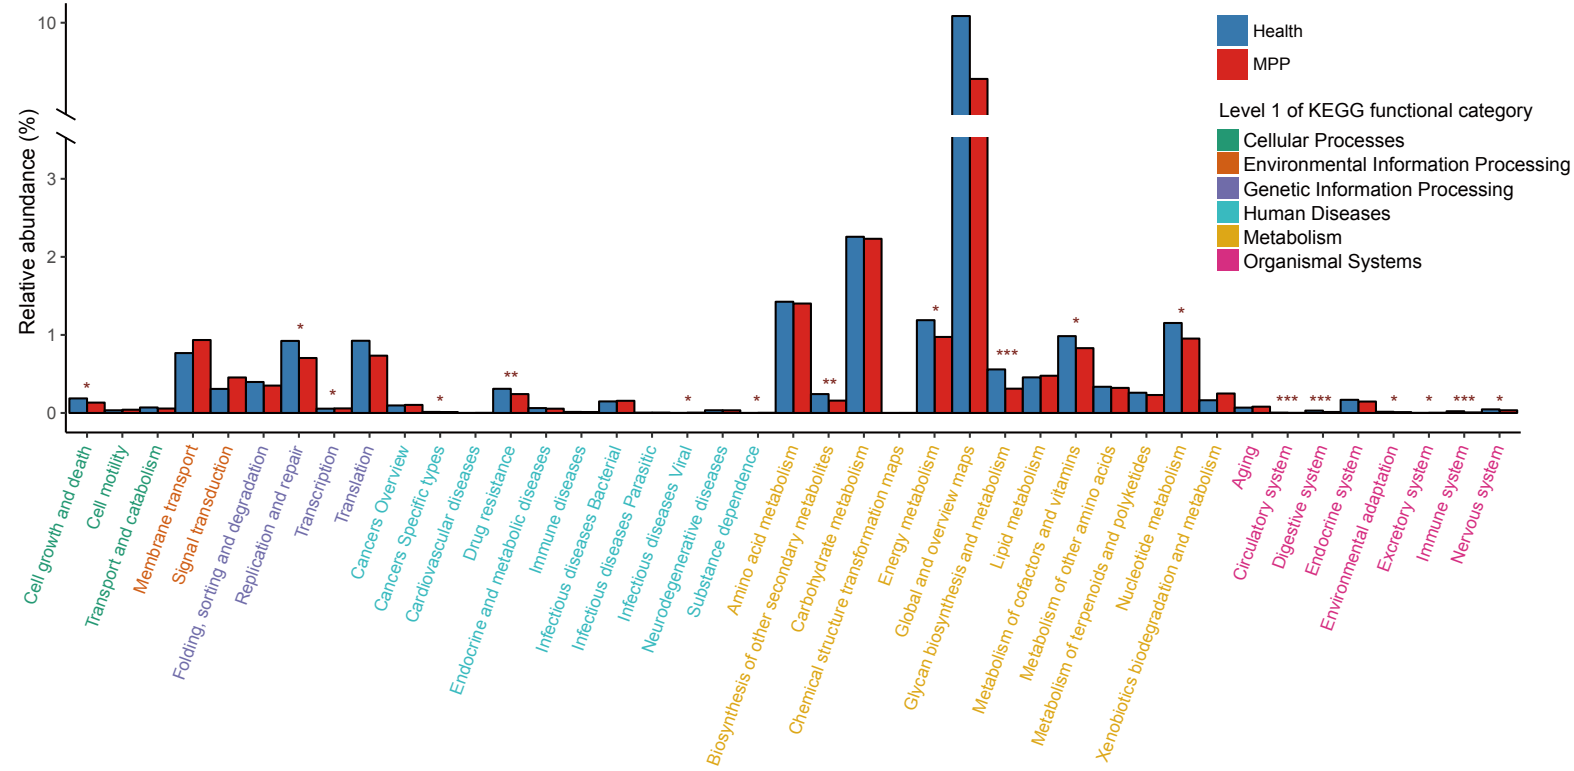



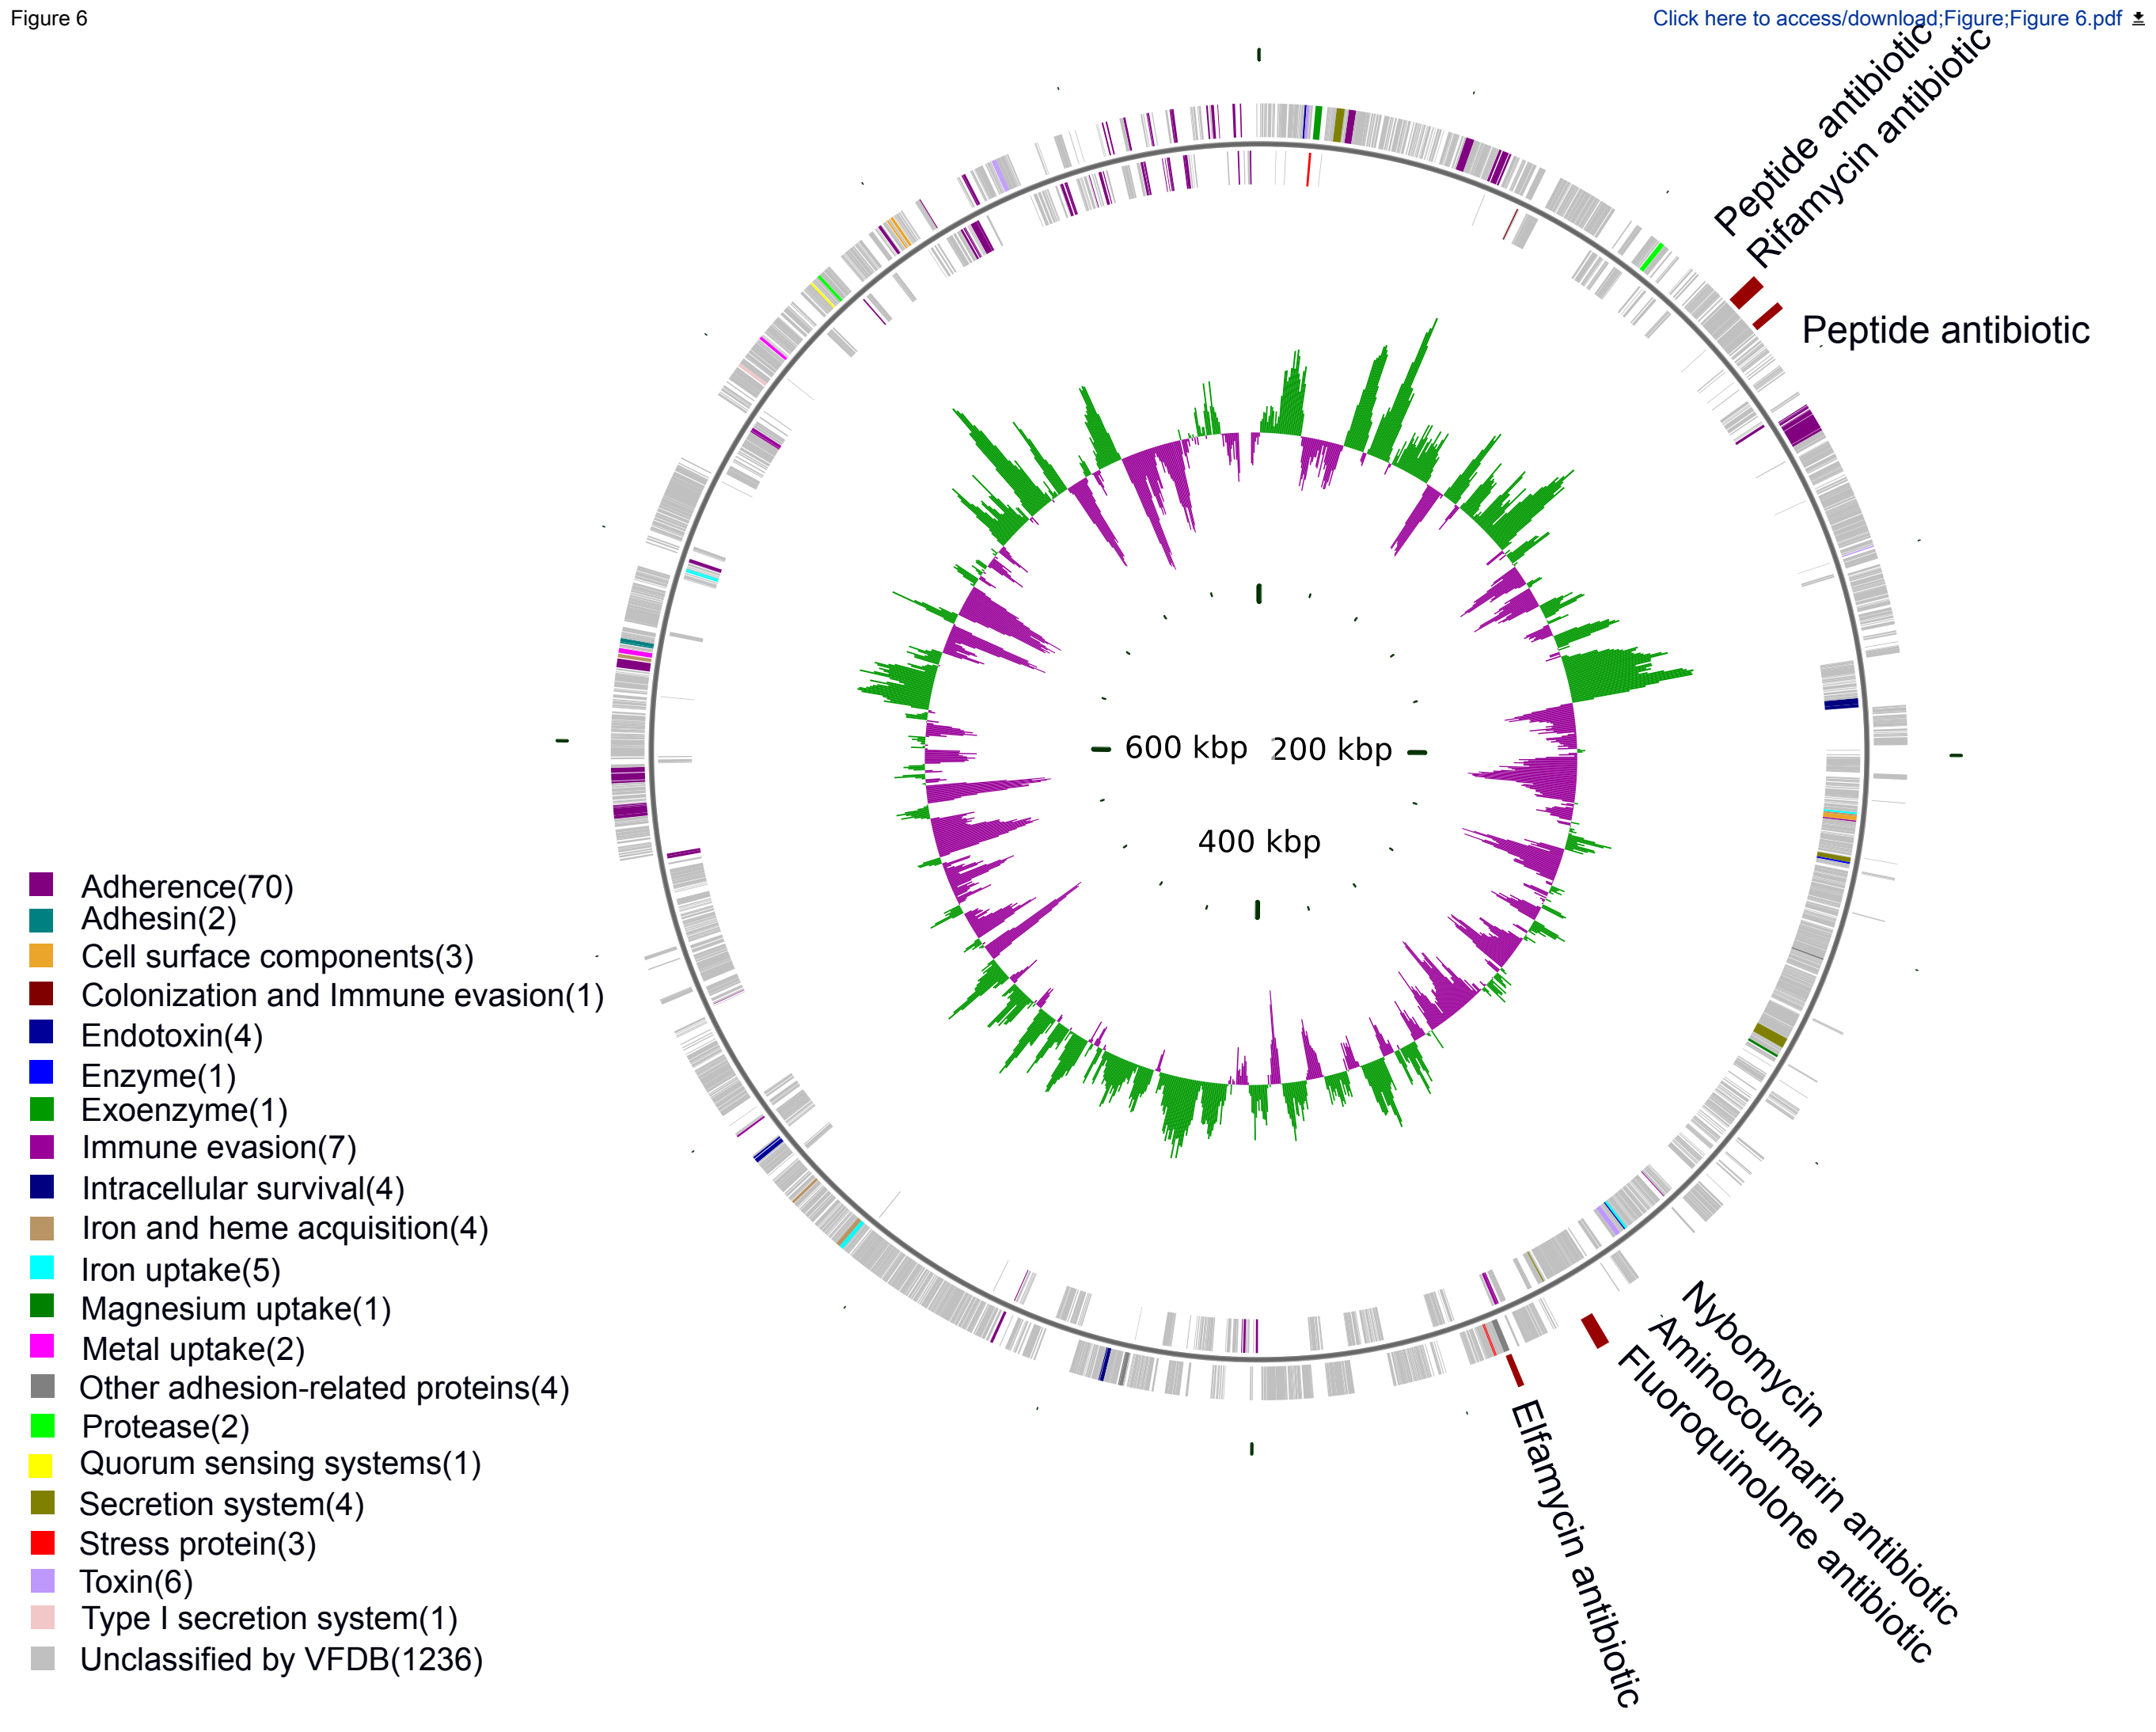

Figure 7

[Click here to access/download;Figure;Figure 7.pdf](#)
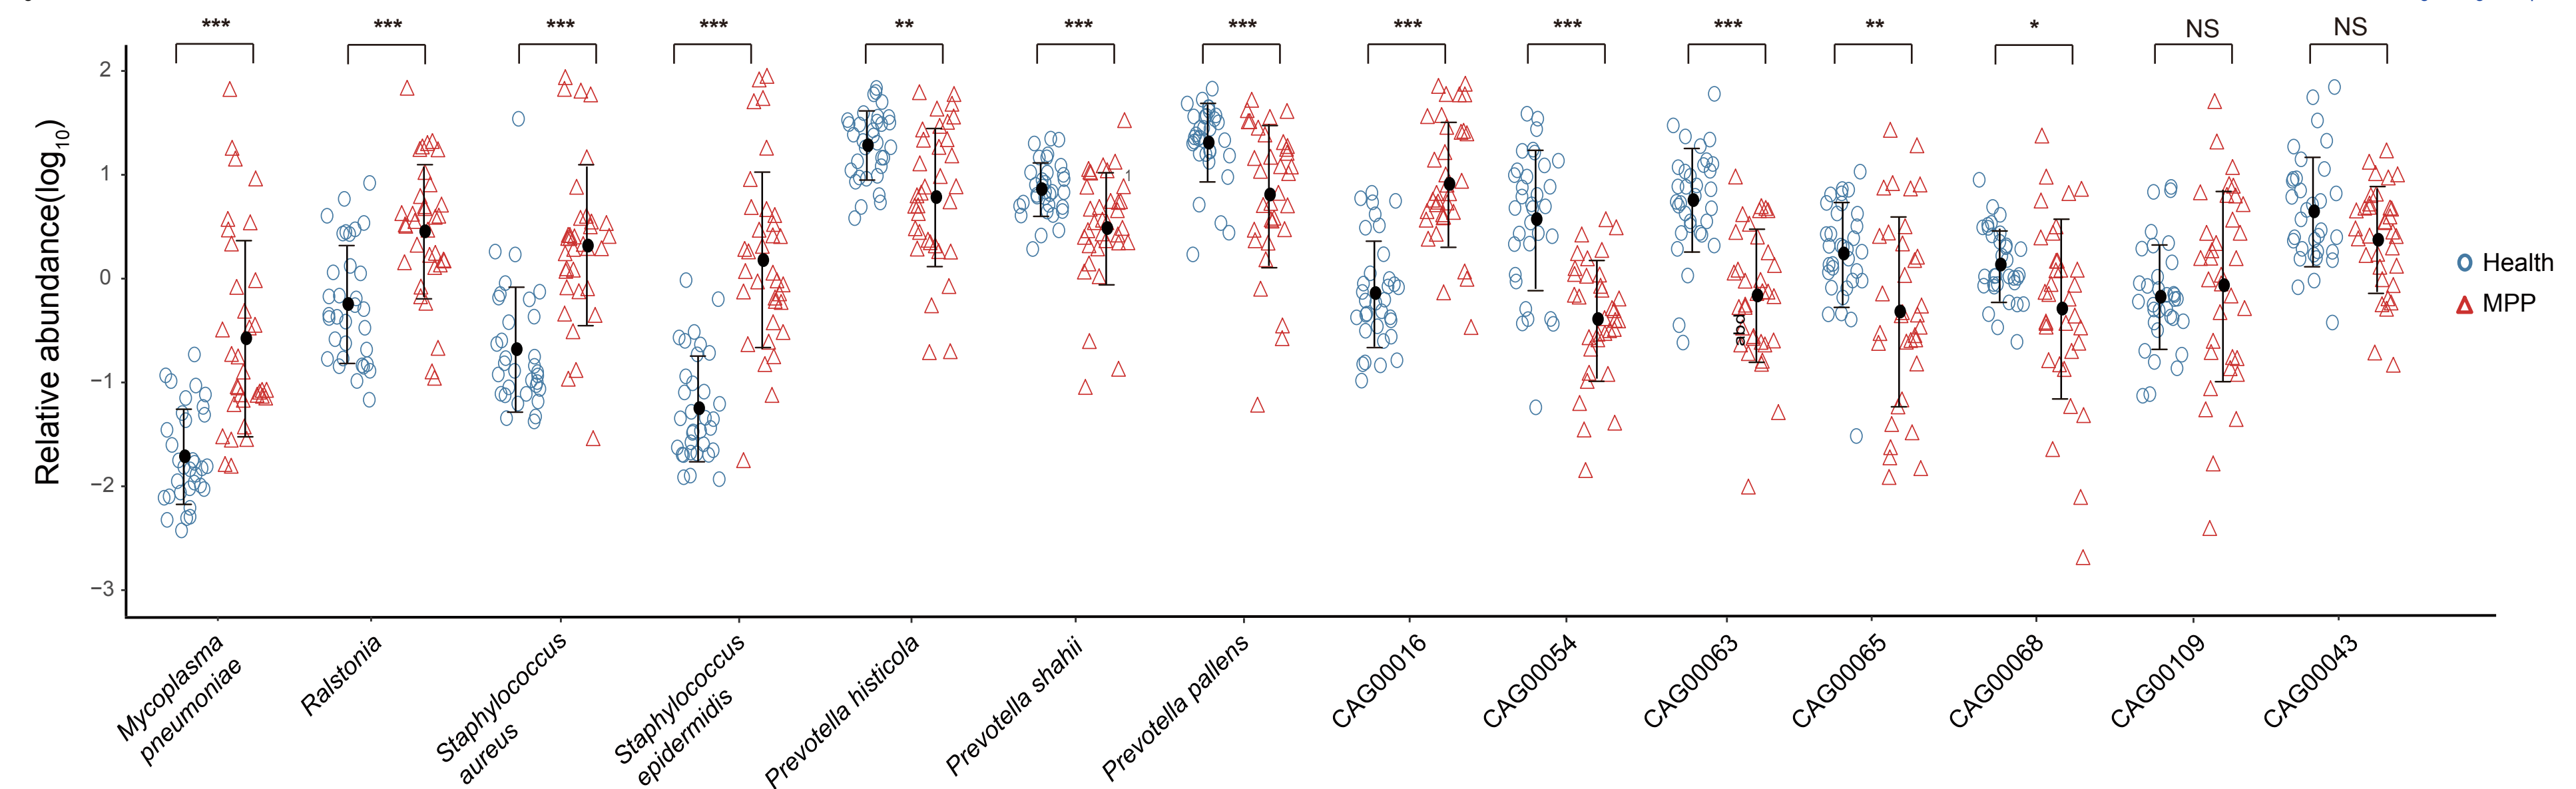

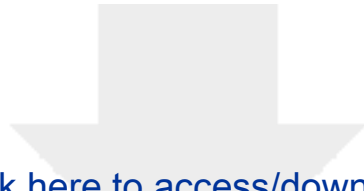

Click here to access/download  
**Supplementary Material**  
Supplemental material legends.docx

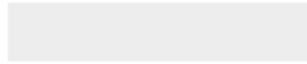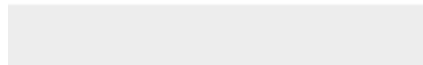

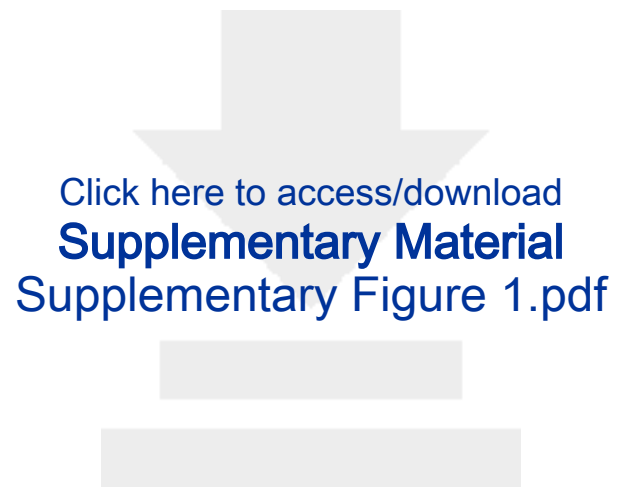

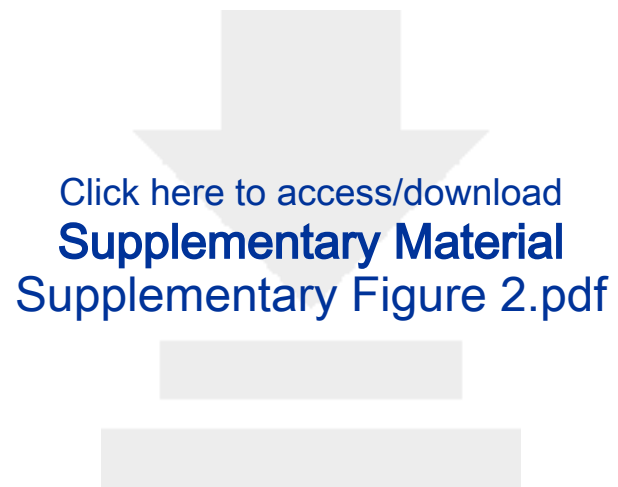

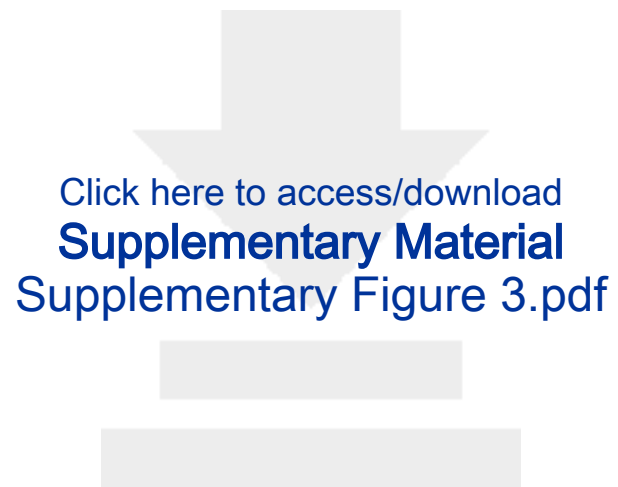

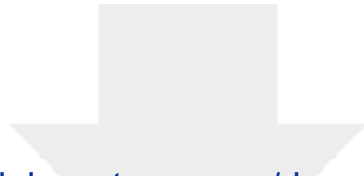

Click here to access/download  
**Supplementary Material**  
Supplementary Table 1.xlsx

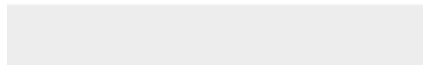



Click here to access/download  
**Supplementary Material**  
Supplementary Table 2.xlsx

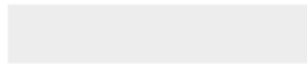





Click here to access/download  
**Supplementary Material**  
Supplementary Table 3.xlsx





Click here to access/download  
**Supplementary Material**  
Supplementary Table 4.xlsx

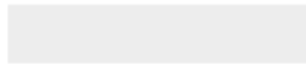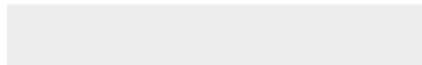



Click here to access/download  
**Supplementary Material**  
Supplementary Table 5.xlsx

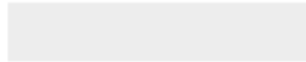



Click here to access/download  
**Supplementary Material**  
Supplementary Table 6.xlsx



Supplement: giz093_giga-d-19-00029_revision_3.pdf [file giz093_giga-d-19-00029_revision_3.pdf]
