# Supplementary material for: An integrated respiratory microbial gene catalogue to better understand the microbial aetiology of Mycoplasma pneumoniae pneumonia
Source: PubMed Central journal article supplement (PMC6669060; doi:10.1093/gigascience/giz093), 2019-07-31
Supplement: giz093_giga-d-19-00029_revision_1.pdf [file giz093_giga-d-19-00029_revision_1.pdf]

# GigaScience

## The integrated respiratory microbial gene catalogue facilitate the understanding of microbial aetiology in *Mycoplasma pneumoniae pneumonia* --Manuscript Draft--

|                                                      |                                                                                                                                                                                                                                                                                                                                                                                                                                                                                                                                                                                                                                                                                                                                                                                                                                                                                                                                                                                                                                                                                                                                                                                                                                                                                                                                                                                                                                                                                                                                                                                                                                                                                                                                                                                                                                                                                                                               |                 |
|------------------------------------------------------|-------------------------------------------------------------------------------------------------------------------------------------------------------------------------------------------------------------------------------------------------------------------------------------------------------------------------------------------------------------------------------------------------------------------------------------------------------------------------------------------------------------------------------------------------------------------------------------------------------------------------------------------------------------------------------------------------------------------------------------------------------------------------------------------------------------------------------------------------------------------------------------------------------------------------------------------------------------------------------------------------------------------------------------------------------------------------------------------------------------------------------------------------------------------------------------------------------------------------------------------------------------------------------------------------------------------------------------------------------------------------------------------------------------------------------------------------------------------------------------------------------------------------------------------------------------------------------------------------------------------------------------------------------------------------------------------------------------------------------------------------------------------------------------------------------------------------------------------------------------------------------------------------------------------------------|-----------------|
| <b>Manuscript Number:</b>                            | GIGA-D-19-00029R1                                                                                                                                                                                                                                                                                                                                                                                                                                                                                                                                                                                                                                                                                                                                                                                                                                                                                                                                                                                                                                                                                                                                                                                                                                                                                                                                                                                                                                                                                                                                                                                                                                                                                                                                                                                                                                                                                                             |                 |
| <b>Full Title:</b>                                   | The integrated respiratory microbial gene catalogue facilitate the understanding of microbial aetiology in <i>Mycoplasma pneumoniae pneumonia</i>                                                                                                                                                                                                                                                                                                                                                                                                                                                                                                                                                                                                                                                                                                                                                                                                                                                                                                                                                                                                                                                                                                                                                                                                                                                                                                                                                                                                                                                                                                                                                                                                                                                                                                                                                                             |                 |
| <b>Article Type:</b>                                 | Research                                                                                                                                                                                                                                                                                                                                                                                                                                                                                                                                                                                                                                                                                                                                                                                                                                                                                                                                                                                                                                                                                                                                                                                                                                                                                                                                                                                                                                                                                                                                                                                                                                                                                                                                                                                                                                                                                                                      |                 |
| <b>Funding Information:</b>                          | Key Medical Disciplines Building Project of Shenzhen (SZXJ2017005)                                                                                                                                                                                                                                                                                                                                                                                                                                                                                                                                                                                                                                                                                                                                                                                                                                                                                                                                                                                                                                                                                                                                                                                                                                                                                                                                                                                                                                                                                                                                                                                                                                                                                                                                                                                                                                                            | Mr Zhiwei Lu    |
|                                                      | Sanming Project of Medicine in Shenzhen (SZSM201512030)                                                                                                                                                                                                                                                                                                                                                                                                                                                                                                                                                                                                                                                                                                                                                                                                                                                                                                                                                                                                                                                                                                                                                                                                                                                                                                                                                                                                                                                                                                                                                                                                                                                                                                                                                                                                                                                                       | Dr Yuejie Zheng |
|                                                      | Shenzhen Science and Technology Project (JCYJ20170303155012371)                                                                                                                                                                                                                                                                                                                                                                                                                                                                                                                                                                                                                                                                                                                                                                                                                                                                                                                                                                                                                                                                                                                                                                                                                                                                                                                                                                                                                                                                                                                                                                                                                                                                                                                                                                                                                                                               | Mr Heping Wang  |
|                                                      | Shenzhen Science and Technology Project (JCYJ20170816170527583)                                                                                                                                                                                                                                                                                                                                                                                                                                                                                                                                                                                                                                                                                                                                                                                                                                                                                                                                                                                                                                                                                                                                                                                                                                                                                                                                                                                                                                                                                                                                                                                                                                                                                                                                                                                                                                                               | Mr Heping Wang  |
| <b>Abstract:</b>                                     | <p><b>Background</b><br/>An imbalanced respiratory microbiota has been observed in pneumonia which caused high morbidity and mortality in childhood. Respiratory metagenomic analysis demands a comprehensive microbial gene catalogue which will significantly advance our understanding of host-microbiota interactions.</p> <p><b>Results</b><br/>In this study, we collected 334 respiratory microbial samples from 171 healthy children and 76 pneumonia children. The established respiratory microbial gene catalogue (RMGC) comprised 2.25 million non-redundant microbial genes covering 90.52% prevalent genes. The core microbial species in the oropharynx (OP) of the healthy children mainly comprised <i>Prevotella</i> and <i>Streptococcus</i>. The OP microbial diversity and gene number in children with <i>Mycoplasma pneumoniae pneumonia</i> (MPP) decreased compared to that in healthy children, and the concurrence network of OP microbiota in patients is featured by <i>Staphylococcus</i> spp. and <i>M. pneumoniae</i>. Functional orthologues, which are associated with the metabolism of various lipids, membrane transport and signal transduction, accumulated in the OP microbiome of sick children. Several antibiotics-resistance genes (ARGs) and virulence-factor genes (VFGs) were identified in <i>M. pneumoniae</i> as well as other 13 microbial draft genomes, which were reconstructed via metagenomic data. Though the common macrolides/beta-lactam-resistance genes were not identified in assembled <i>M. pneumoniae</i> genome, a SNP mutation (A2063G) related with macrolides resistance was identified in 23S rRNA gene.</p> <p><b>Conclusions</b><br/>This study will facilitate exploring unknown microbial components and host-microbiota interaction in respiratory microbiome studies as well as render further insights into the microbial aetiology of MPP.</p> |                 |
| <b>Corresponding Author:</b>                         | Yuejie Zheng<br>Shenzhen Children's Hospital<br>Shenzhen, Guangdong CHINA                                                                                                                                                                                                                                                                                                                                                                                                                                                                                                                                                                                                                                                                                                                                                                                                                                                                                                                                                                                                                                                                                                                                                                                                                                                                                                                                                                                                                                                                                                                                                                                                                                                                                                                                                                                                                                                     |                 |
| <b>Corresponding Author Secondary Information:</b>   |                                                                                                                                                                                                                                                                                                                                                                                                                                                                                                                                                                                                                                                                                                                                                                                                                                                                                                                                                                                                                                                                                                                                                                                                                                                                                                                                                                                                                                                                                                                                                                                                                                                                                                                                                                                                                                                                                                                               |                 |
| <b>Corresponding Author's Institution:</b>           | Shenzhen Children's Hospital                                                                                                                                                                                                                                                                                                                                                                                                                                                                                                                                                                                                                                                                                                                                                                                                                                                                                                                                                                                                                                                                                                                                                                                                                                                                                                                                                                                                                                                                                                                                                                                                                                                                                                                                                                                                                                                                                                  |                 |
| <b>Corresponding Author's Secondary Institution:</b> |                                                                                                                                                                                                                                                                                                                                                                                                                                                                                                                                                                                                                                                                                                                                                                                                                                                                                                                                                                                                                                                                                                                                                                                                                                                                                                                                                                                                                                                                                                                                                                                                                                                                                                                                                                                                                                                                                                                               |                 |
| <b>First Author:</b>                                 | Wenkui Dai                                                                                                                                                                                                                                                                                                                                                                                                                                                                                                                                                                                                                                                                                                                                                                                                                                                                                                                                                                                                                                                                                                                                                                                                                                                                                                                                                                                                                                                                                                                                                                                                                                                                                                                                                                                                                                                                                                                    |                 |

|                                                |                                                                                                                                                                                                                                                                                                                                                                                                                                                                                                                                                                                                                                                                                                                                                                                                                                                                                                                                                                                                                                                                                                                                                                                                                                                                                                                                                                                                                                                                                                                                                                                                                                                                                                                                                                                                                                                                                                                                |
|------------------------------------------------|--------------------------------------------------------------------------------------------------------------------------------------------------------------------------------------------------------------------------------------------------------------------------------------------------------------------------------------------------------------------------------------------------------------------------------------------------------------------------------------------------------------------------------------------------------------------------------------------------------------------------------------------------------------------------------------------------------------------------------------------------------------------------------------------------------------------------------------------------------------------------------------------------------------------------------------------------------------------------------------------------------------------------------------------------------------------------------------------------------------------------------------------------------------------------------------------------------------------------------------------------------------------------------------------------------------------------------------------------------------------------------------------------------------------------------------------------------------------------------------------------------------------------------------------------------------------------------------------------------------------------------------------------------------------------------------------------------------------------------------------------------------------------------------------------------------------------------------------------------------------------------------------------------------------------------|
| <b>First Author Secondary Information:</b>     |                                                                                                                                                                                                                                                                                                                                                                                                                                                                                                                                                                                                                                                                                                                                                                                                                                                                                                                                                                                                                                                                                                                                                                                                                                                                                                                                                                                                                                                                                                                                                                                                                                                                                                                                                                                                                                                                                                                                |
| <b>Order of Authors:</b>                       | Wenkui Dai                                                                                                                                                                                                                                                                                                                                                                                                                                                                                                                                                                                                                                                                                                                                                                                                                                                                                                                                                                                                                                                                                                                                                                                                                                                                                                                                                                                                                                                                                                                                                                                                                                                                                                                                                                                                                                                                                                                     |
|                                                | Heping Wang                                                                                                                                                                                                                                                                                                                                                                                                                                                                                                                                                                                                                                                                                                                                                                                                                                                                                                                                                                                                                                                                                                                                                                                                                                                                                                                                                                                                                                                                                                                                                                                                                                                                                                                                                                                                                                                                                                                    |
|                                                | Dongfang Li                                                                                                                                                                                                                                                                                                                                                                                                                                                                                                                                                                                                                                                                                                                                                                                                                                                                                                                                                                                                                                                                                                                                                                                                                                                                                                                                                                                                                                                                                                                                                                                                                                                                                                                                                                                                                                                                                                                    |
|                                                | Qian Zhou                                                                                                                                                                                                                                                                                                                                                                                                                                                                                                                                                                                                                                                                                                                                                                                                                                                                                                                                                                                                                                                                                                                                                                                                                                                                                                                                                                                                                                                                                                                                                                                                                                                                                                                                                                                                                                                                                                                      |
|                                                | Xin Feng                                                                                                                                                                                                                                                                                                                                                                                                                                                                                                                                                                                                                                                                                                                                                                                                                                                                                                                                                                                                                                                                                                                                                                                                                                                                                                                                                                                                                                                                                                                                                                                                                                                                                                                                                                                                                                                                                                                       |
|                                                | Zhenyu Yang                                                                                                                                                                                                                                                                                                                                                                                                                                                                                                                                                                                                                                                                                                                                                                                                                                                                                                                                                                                                                                                                                                                                                                                                                                                                                                                                                                                                                                                                                                                                                                                                                                                                                                                                                                                                                                                                                                                    |
|                                                | Wenjian Wang                                                                                                                                                                                                                                                                                                                                                                                                                                                                                                                                                                                                                                                                                                                                                                                                                                                                                                                                                                                                                                                                                                                                                                                                                                                                                                                                                                                                                                                                                                                                                                                                                                                                                                                                                                                                                                                                                                                   |
|                                                | Chuangzhao Qiu                                                                                                                                                                                                                                                                                                                                                                                                                                                                                                                                                                                                                                                                                                                                                                                                                                                                                                                                                                                                                                                                                                                                                                                                                                                                                                                                                                                                                                                                                                                                                                                                                                                                                                                                                                                                                                                                                                                 |
|                                                | Zhiwei Lu                                                                                                                                                                                                                                                                                                                                                                                                                                                                                                                                                                                                                                                                                                                                                                                                                                                                                                                                                                                                                                                                                                                                                                                                                                                                                                                                                                                                                                                                                                                                                                                                                                                                                                                                                                                                                                                                                                                      |
|                                                | Ximing Xu                                                                                                                                                                                                                                                                                                                                                                                                                                                                                                                                                                                                                                                                                                                                                                                                                                                                                                                                                                                                                                                                                                                                                                                                                                                                                                                                                                                                                                                                                                                                                                                                                                                                                                                                                                                                                                                                                                                      |
|                                                | Mengxuan Lyu                                                                                                                                                                                                                                                                                                                                                                                                                                                                                                                                                                                                                                                                                                                                                                                                                                                                                                                                                                                                                                                                                                                                                                                                                                                                                                                                                                                                                                                                                                                                                                                                                                                                                                                                                                                                                                                                                                                   |
|                                                | Gan Xie                                                                                                                                                                                                                                                                                                                                                                                                                                                                                                                                                                                                                                                                                                                                                                                                                                                                                                                                                                                                                                                                                                                                                                                                                                                                                                                                                                                                                                                                                                                                                                                                                                                                                                                                                                                                                                                                                                                        |
|                                                | Yinhu Li                                                                                                                                                                                                                                                                                                                                                                                                                                                                                                                                                                                                                                                                                                                                                                                                                                                                                                                                                                                                                                                                                                                                                                                                                                                                                                                                                                                                                                                                                                                                                                                                                                                                                                                                                                                                                                                                                                                       |
|                                                | Yanmin Bao                                                                                                                                                                                                                                                                                                                                                                                                                                                                                                                                                                                                                                                                                                                                                                                                                                                                                                                                                                                                                                                                                                                                                                                                                                                                                                                                                                                                                                                                                                                                                                                                                                                                                                                                                                                                                                                                                                                     |
|                                                | Yanhong Liu                                                                                                                                                                                                                                                                                                                                                                                                                                                                                                                                                                                                                                                                                                                                                                                                                                                                                                                                                                                                                                                                                                                                                                                                                                                                                                                                                                                                                                                                                                                                                                                                                                                                                                                                                                                                                                                                                                                    |
|                                                | Kunling Shen                                                                                                                                                                                                                                                                                                                                                                                                                                                                                                                                                                                                                                                                                                                                                                                                                                                                                                                                                                                                                                                                                                                                                                                                                                                                                                                                                                                                                                                                                                                                                                                                                                                                                                                                                                                                                                                                                                                   |
|                                                | Kaihu Yao                                                                                                                                                                                                                                                                                                                                                                                                                                                                                                                                                                                                                                                                                                                                                                                                                                                                                                                                                                                                                                                                                                                                                                                                                                                                                                                                                                                                                                                                                                                                                                                                                                                                                                                                                                                                                                                                                                                      |
|                                                | Xikang Feng                                                                                                                                                                                                                                                                                                                                                                                                                                                                                                                                                                                                                                                                                                                                                                                                                                                                                                                                                                                                                                                                                                                                                                                                                                                                                                                                                                                                                                                                                                                                                                                                                                                                                                                                                                                                                                                                                                                    |
|                                                | Yonghong Yang                                                                                                                                                                                                                                                                                                                                                                                                                                                                                                                                                                                                                                                                                                                                                                                                                                                                                                                                                                                                                                                                                                                                                                                                                                                                                                                                                                                                                                                                                                                                                                                                                                                                                                                                                                                                                                                                                                                  |
|                                                | Shuaicheng Li                                                                                                                                                                                                                                                                                                                                                                                                                                                                                                                                                                                                                                                                                                                                                                                                                                                                                                                                                                                                                                                                                                                                                                                                                                                                                                                                                                                                                                                                                                                                                                                                                                                                                                                                                                                                                                                                                                                  |
|                                                | Ke Zhou                                                                                                                                                                                                                                                                                                                                                                                                                                                                                                                                                                                                                                                                                                                                                                                                                                                                                                                                                                                                                                                                                                                                                                                                                                                                                                                                                                                                                                                                                                                                                                                                                                                                                                                                                                                                                                                                                                                        |
|                                                | Yuejie Zheng                                                                                                                                                                                                                                                                                                                                                                                                                                                                                                                                                                                                                                                                                                                                                                                                                                                                                                                                                                                                                                                                                                                                                                                                                                                                                                                                                                                                                                                                                                                                                                                                                                                                                                                                                                                                                                                                                                                   |
| <b>Order of Authors Secondary Information:</b> |                                                                                                                                                                                                                                                                                                                                                                                                                                                                                                                                                                                                                                                                                                                                                                                                                                                                                                                                                                                                                                                                                                                                                                                                                                                                                                                                                                                                                                                                                                                                                                                                                                                                                                                                                                                                                                                                                                                                |
| <b>Response to Reviewers:</b>                  | <p>Dear Editors and Reviewers,</p> <p>Many thanks for your professional comments, please kindly check the responses below. As for the author list, we did adjustment based on manuscript revision, please kindly check the updated list in the manuscript.</p> <p>Reviewer #1:</p> <p>The authors constructed a respiratory microbial gene catalogue (RMGC) by metagenomics analysis on respiratory microbial samples from 171 healthy and 76 pneumonia children and compared the difference of gene set and microbiome between the healthy and pneumonia children. Data showed obvious difference between the two groups. I have some questions below:</p> <p>1. Patient inclusion. This study focused on the etiology of <i>Mycoplasma pneumoniae</i> pneumonia (MPP), however, the enrollment criteria for the 76 patients was based on pneumonia and no specific requirement for Mpn positive test. Actually, there were only 52 patients listed in Supplemental Table 1 were Mpn positive in BALF. Then how did the comparison performed in the subsequent analysis? Were all 76 patients included or only the 52 Mpn-positive patients considered?</p> <p>1. Response: Thanks for your questions. We aimed to construct a non-redundant integrated gene catalogue of respiratory microbes and applied the gene set to deepen the understanding of imbalanced microbial components as well as functions in <i>Mycoplasma pneumoniae</i>-associated pneumonia. Given different respiratory microbiota imbalance when infected by bacterial, <i>Mycoplasma</i> or viral pathogens, we included pneumonia children with infections of different pathogens and public respiratory microbial genomes to construct the integrated gene set. Then we focused on the imbalanced respiratory microbiome analysis for 34 patients, who were diagnosed as <i>M. pneumoniae</i> infection by BALF detection, compared to randomly</p> |

selected 33 age-matched healthy children.

2. Line 146. The website is not accessible.

2. Response: We have updated the website of the RMGC and the URL also been changed (<https://rmgc.deepomics.org>), please kindly check the new URL link.

3. Line 169. Spell out "KOs" since it appeared first here in the text, not in the Methods part. Same as "CAGs" in line 193.

3. Response: Thanks for your kind reminding. The full names of aberrations (KOs and CAGs) were mentioned in the first appearance. KOs, KEGG Orthology; CAGs, Co-Abundance Gene Groups.

4. Line 72-73, 205-206 and 267-269. In the abstract, the authors stated "orthologues, which are associated with the metabolism of various lipids, membrane transport and signal transduction, accumulated significantly in the OP microbiome of sick children". However, in the text and Figure 5b, the enrichment is "slightly". In the discussion, the authors stated these gene functions could partly explain the reduced tight junction proteins and increased respiratory mucosa permeability after infection. Please discuss with more details and supporting references.

4. Response: Thanks for your careful review. We have checked the analysis results, and removed the inaccurate word "significantly" in the abstract. We also rewrote the related description in the manuscript. Please kindly check the revised manuscript.

5. Line 220-221. Please list the names of the 4 antibiotic-resistance genes.

5. Response: Thanks for your comment. We totally identified 4 homological antibiotic resistance genes via aligning the assembled genome to CARD (The Comprehensive Antibiotic Resistance Database), named "Mycobacterium tuberculosis gyrA conferring resistance to fluoroquinolones", "Staphylococcus aureus rpoC conferring resistance to daptomycin", "Staphylococcus aureus rpoB mutants conferring resistance to rifampicin" and "Escherichia coli EF-Tu mutants conferring resistance to kirromycin". These gene names were also mentioned in Supplementary Table 4, please kindly check the revision.

6. Line 224-228. Please explain why there are multiple copies of CARDS toxin genes (MPN372 in M129 genome) in the virulence-factor genes list. In all published Mpn genomes, CARDS toxin is a single copy gene. P1 adhesin is also a single copy gene, although it contains a repetitive element (repMp2/3) which other copies are spread across the genome. Could there be any annotation errors for the assembled Mpn genome?

6. Response: Thanks for your professional comments. We have reassessed the genome assembly through the published international standard developed by the Genomic Standards Consortium (GSC), and the criterion of Mpn genome is "Medium-quality draft". Though the assembled genome size of Mycoplasma pneumonia (0.80Mb) is close to the reference genome (0.82Mb), 49 genomic fragments were not assembled. Due to the limitations of respiratory metagenomic sequencing, such as low bacterial biomass in airway samples, short paired-end reads and assembly methods, the genome sequences would be separated by homologous or repetitive sequences, and multiple gene segments could be found in different contigs. We have also rechecked the gene prediction results, it showed that multiple copies of CARDS toxin genes and P1 adhesion genes existed in different contigs. This limitation was also listed in the discussion, please kindly check the revision.

7. Line 292. "no macrolide/beta-lactam resistance genes were identified in M. pneumoniae genome". Macrolide resistance in Mpn is due to the point mutations in 23S rRNA gene. I believe 23S rRNA gene must present in the assembled Mpn genome. Please check if there are any mutations conferring macrolide resistance in 23S rRNA gene.

7. Response: Thanks for your professional suggestion. The RMGC was composed of coding sequences (CDS) gene rather than non-CDS gene (rRNA, tRNA). As you suggested, the sequencing data of M. pneumoniae-positive samples were further mapped against M. pneumoniae 23S rRNA gene, and we analyzed the samples with read-mapping coverage on the 23S rRNA more than 10x depths. We finally verified that 8 samples contained reliable 23S rRNA SNP mutations (A2063G), which was correlated to macrolide resistance. We have rewritten the manuscript about this SNP

description. Please kindly check the new submission.

Reviewer #2:

This is an observational metagenomic/microbiome study that examines differences in taxonomic composition and gene content between children with pneumonia and controls. It compiles a rather large sample dataset, and the authors make available a gene catalog specific to the upper respiratory tract. It seems that the respiratory microbiome was well sampled, as evidenced by the rarefaction results.

1. I think the authors need to discuss their results in light of findings from other respiratory microbiome studies (which they partially do), and more importantly, of other gene catalog efforts such as:

Qin, J., Li, R., Raes, J., Arumugam, M., Burgdorf, K.S., Manichanh, C., Nielsen, T., Pons, N., Levenez, F., Yamada, T. and Mende, D.R., 2010. A human gut microbial gene catalogue established by metagenomic sequencing. *nature*, 464(7285), p.59.

Li, J., Jia, H., Cai, X., Zhong, H., Feng, Q., Sunagawa, S., Arumugam, M., Kultima, J.R., Prifti, E., Nielsen, T. and Juncker, A.S., 2014. An integrated catalog of reference genes in the human gut microbiome. *Nature biotechnology*, 32(8), p.834.

1. Response: Thanks for your suggestion. Refer to your suggested publications, we have rewritten the discussion about the contribution and potential influence of integrated respiratory microbial gene catalogue to respiratory microbiome study. Please kindly check the revision.

General Comments

2. Is it OK to compare NP, OP, and lung microbiota from pneumonia patients with OP from controls? How do you control for site specific microbiota composition?

2. Response: Thanks for your comment. We combined the data from NP, OP and lung microbiome in both diseased and healthy children to establish the respiratory microbial gene set. Given enough data depth in OP microbiota, we applied the reference gene set to analyze microbial components, genes and functions in each OP microbial sample, and then compared the OP microbiome differences between diseased and healthy children. We did not conduct comparison between NP, OP and lung microbiome in patients with OP microbiome in healthy children. This study design has been clarified in the revision, please kindly check it.

3. Did the authors control for the differences in gender and age? Those seem to be significant as judging by the proportion of females 31% and 50% for example. Did you perform any test to check whether these differences are significant?

3. Response: Thanks for your comments. We compared the OP microbiome differences between 34 pneumonia patients (16 girls and 18 boys) and 33 age-matched random-selected healthy children (15 girls and 18 boys) with data size more than 650 Mbp. There are no significant difference of age ( $p$ -value = 0.545, by  $t$  test) or gender ( $p$ -value = 0.542, by Chi-square test) between two groups. We also checked other characteristics related to the microbial composition by PERMANOVA, and the "pneumonia onset" was the most significant factor (adjust  $p$ -value < 0.001).

4. Assembly quality should be judge using published standards. The authors describe in detail how they obtained genomes from metagenomes. However, there are international standards regarding this, and it would be preferable that they use them so as to provide the readership with an objective point of comparison. See <https://www.ncbi.nlm.nih.gov/pubmed/28787424>

4. Response: Really appreciated your professional suggestions. We firstly assessed the assembly quality via 6 criteria at the "Single microbial genome assembling from OP metagenomic data" (referring to <https://www.ncbi.nlm.nih.gov/pmc/articles/pmid/26425705/>). As you suggested, we updated the assembly quality estimation following the published international standard developed by the Genomic Standards Consortium (GSC). The more comprehensive objective metrics of assembly quality were added in the Supplementary Table 3. Please kindly check the updated manuscript and Supplementary Table 3.

Minor Comments

5. Abstract

Line 62 - Define RMGC  
 Line 70 - What do you mean by "simple co-occurrence network"? What's so simple and what are complex co-occurrence networks  
 Line 74 - Please do not use apostrophes  
 5. Response:  
 Line 62: RMGC is the abbreviation for respiratory microbial gene catalogue, which comprised non-redundant respiratory microbial genes.  
 Line 70: Many thanks for your professional comments and we optimized the expressions in the revision.  
 Line 74: Thanks for your reminding and we removed it as you suggested.

6. Background  
 First paragraph - Please add something related to pneumonia worldwide. The authors say it's relevant in China but I'm sure it's relevant elsewhere as well.  
 Line 87 - Is it not the etiology of MPP Mycoplasma?  
 Line 89 - Please replace "the present" with "current"  
 Line 91 - There are plenty of pipelines that do not use OTU clustering and can get taxonomic classifications down to species. For example, see <https://f1000research.com/articles/5-1492/v2>  
 Line 93 - The authors mention that strain level microbiome studies are needed in MPP but they do not perform any strain-level analysis  
 6. Response:  
 First paragraph: Thanks for your suggestion. The worldwide medical information of pneumonia has been added in Background paragraph, please kindly check it.  
 Line 87: Mycoplasma pneumoniae is the pathogenic agent of MPP. However, it remained to be fully understood for differed disease severity in MPP patients. We aimed to deepen the understanding of microbial contributions in MPP incidence as well as progression, as a series of reports indicated the association of respiratory microbiota with respiratory disease severity.  
 Line 89: We have replaced the "the present" with "current".  
 Line 91: Many thanks for your professional suggestions, it is really a great tool for microbial amplicon analysis to get taxonomic classifications. We will refer to these pipelines to update previous respiratory tract microbiota studies. In this study, we conducted metagenome sequencing instead of 16S rRNA analysis to build a respiratory microbial gene catalogue as well as identify microbial functions and gene elements from assembled genomes.  
 Line 93: Really appreciated for your careful and professional comment. We intended to conduct species instead of strain-level analysis, and we revised it in the revision.

7. Analyses  
 Line 136 - It is better to express this in "read numbers" instead of Gbps.  
 Line 144 - Why do authors say bacterial genes? Did you filter any non-bacterial DNA sequences/reads? If you do shotgun sequencing you will likely find fungi, viruses and others. Please explain.  
 Line 146 - The webpage [https://deepomics.org/respiratory\\_microbial\\_gene\\_catalogue/](https://deepomics.org/respiratory_microbial_gene_catalogue/) does not exist  
 Line 148 - Could you elaborate on why using samples with more than 650 Mb? Why not 600 or 700?  
 Line 177 - Please replace "We totally acquired" by "We acquired 67 core species in total"  
 Line 193 - Please define CAGs as on this line the acronym appears for the first time  
 Line 217 - 2.30 Mb is very low for a bacterial genome. Please elaborate on why this might be. Comment on genome completeness  
 Line 229 - What's the evidence regarding the designation of a new species? Nucleotide identity, gene content? Please discuss in the manuscript and consider some objective metric such as the Genome Taxonomy DB <https://www.nature.com/articles/nbt.4229>  
 Line 254 - Please revise this sentence as it is grammatically incorrect  
 7. Response:  
 Line 136: Thanks for your suggestion. We have replaced the "Gbps" by "read numbers".  
 Line 144: We replaced this inadequate word "bacterial" by "microbial".  
 Line 146: This website was updated recently, and moved to a new website (<https://rmgc.deepomics.org>). We declaimed that this website will be permanent. Please kindly check the revised manuscript.

|                                                                                                                                                                                                                                                                                                                                                                                                                                    |                                                                                                                                                                                                                                                                                                                                                                                                                                                                                                                                                                                                                                                                                                                                                                                                                                                                                                                                                                                                                                                                                                                                                                                                                                                                                                                                                                                                                                                                                                                                                                                                                                                                                                                                                                                                                                                                                                                                                                                                                                                                                                                                                                                                                                                                                                                                                                                                                                                                                                                                                                  |
|------------------------------------------------------------------------------------------------------------------------------------------------------------------------------------------------------------------------------------------------------------------------------------------------------------------------------------------------------------------------------------------------------------------------------------|------------------------------------------------------------------------------------------------------------------------------------------------------------------------------------------------------------------------------------------------------------------------------------------------------------------------------------------------------------------------------------------------------------------------------------------------------------------------------------------------------------------------------------------------------------------------------------------------------------------------------------------------------------------------------------------------------------------------------------------------------------------------------------------------------------------------------------------------------------------------------------------------------------------------------------------------------------------------------------------------------------------------------------------------------------------------------------------------------------------------------------------------------------------------------------------------------------------------------------------------------------------------------------------------------------------------------------------------------------------------------------------------------------------------------------------------------------------------------------------------------------------------------------------------------------------------------------------------------------------------------------------------------------------------------------------------------------------------------------------------------------------------------------------------------------------------------------------------------------------------------------------------------------------------------------------------------------------------------------------------------------------------------------------------------------------------------------------------------------------------------------------------------------------------------------------------------------------------------------------------------------------------------------------------------------------------------------------------------------------------------------------------------------------------------------------------------------------------------------------------------------------------------------------------------------------|
|                                                                                                                                                                                                                                                                                                                                                                                                                                    | <p>Line 148: We have drawn the curve of sequencing data size (See Supplementary Figure 3), indicating sharp decrease after 0.65 Gb data size. In Method section, each sample with <math>\geq 650</math> Mbp data was selected for genome assembly, and the data of other samples were mixed for genome assembly. To better assess the RMGC, we then keep the consistent criterion (more than 650 Mb in Line 148).</p> <p>Line 177: We modified the sentence as your suggestion, thanks for your kind comment.</p> <p>Line 193: The full words of aberrations CAGs were Co-Abundance Gene Groups, please kindly check the revised manuscript.</p> <p>Line 217: The average bacterial genome size ranged from 1Mb to 10Mb. The completeness of assembled microbial genomes was evaluated through the international standards (<a href="https://www.ncbi.nlm.nih.gov/pubmed/28787424">https://www.ncbi.nlm.nih.gov/pubmed/28787424</a>), and the assembled genomes were classified as "Medium-quality draft genome". Given the draft genome, several homologous or repetitive sequences would be removed in the assembly process. The detailed assessment of all 14 microbial genomes could refer to the update Table S3.</p> <p>Line 229: Thanks for your suggestions. The species designation of 14 assembled genomes were following three evidences, including 1) concordance with taxonomic assignment of CAGs (<a href="https://www.nature.com/articles/nbt.2939">https://www.nature.com/articles/nbt.2939</a>); 2) aligned to the published genome sequences from IMG, NCBI and PATRIC via BLASTN (parameter: <math>-e</math> 0.01), with <math>\geq 95\%</math> nucleotide identity and <math>\geq 95\%</math> genome coverage; 3) assigned by CheckM from the Genome Taxonomy DB. Combined three evidences, the genome which could not be assigned to any known microbial species were defined as novel species. The detailed species designation method is added in the "Single microbial genome assembling from OP metagenomic data" paragraph of the Method section, and the updated taxonomy information could refer to Supplementary Table 3.</p> <p>Line 254: We have revised the sentence as following: "The core microbial species of OP microbiota in healthy children will provide a reference for exploring microbial as well as host-microbe interactions in RM study."</p> <p>8. Please add the BioProject instead of the SRP accession<br/>8. Response: We added the BioProject ID (PRJNA413615) in the revision, please kindly check it.</p> |
| <b>Additional Information:</b>                                                                                                                                                                                                                                                                                                                                                                                                     |                                                                                                                                                                                                                                                                                                                                                                                                                                                                                                                                                                                                                                                                                                                                                                                                                                                                                                                                                                                                                                                                                                                                                                                                                                                                                                                                                                                                                                                                                                                                                                                                                                                                                                                                                                                                                                                                                                                                                                                                                                                                                                                                                                                                                                                                                                                                                                                                                                                                                                                                                                  |
| <b>Question</b>                                                                                                                                                                                                                                                                                                                                                                                                                    | <b>Response</b>                                                                                                                                                                                                                                                                                                                                                                                                                                                                                                                                                                                                                                                                                                                                                                                                                                                                                                                                                                                                                                                                                                                                                                                                                                                                                                                                                                                                                                                                                                                                                                                                                                                                                                                                                                                                                                                                                                                                                                                                                                                                                                                                                                                                                                                                                                                                                                                                                                                                                                                                                  |
| Are you submitting this manuscript to a special series or article collection?                                                                                                                                                                                                                                                                                                                                                      | No                                                                                                                                                                                                                                                                                                                                                                                                                                                                                                                                                                                                                                                                                                                                                                                                                                                                                                                                                                                                                                                                                                                                                                                                                                                                                                                                                                                                                                                                                                                                                                                                                                                                                                                                                                                                                                                                                                                                                                                                                                                                                                                                                                                                                                                                                                                                                                                                                                                                                                                                                               |
| <p><b>Experimental design and statistics</b></p> <p>Full details of the experimental design and statistical methods used should be given in the Methods section, as detailed in our <a href="#">Minimum Standards Reporting Checklist</a>. Information essential to interpreting the data presented should be made available in the figure legends.</p> <p>Have you included all the information requested in your manuscript?</p> | Yes                                                                                                                                                                                                                                                                                                                                                                                                                                                                                                                                                                                                                                                                                                                                                                                                                                                                                                                                                                                                                                                                                                                                                                                                                                                                                                                                                                                                                                                                                                                                                                                                                                                                                                                                                                                                                                                                                                                                                                                                                                                                                                                                                                                                                                                                                                                                                                                                                                                                                                                                                              |
| <b>Resources</b>                                                                                                                                                                                                                                                                                                                                                                                                                   | Yes                                                                                                                                                                                                                                                                                                                                                                                                                                                                                                                                                                                                                                                                                                                                                                                                                                                                                                                                                                                                                                                                                                                                                                                                                                                                                                                                                                                                                                                                                                                                                                                                                                                                                                                                                                                                                                                                                                                                                                                                                                                                                                                                                                                                                                                                                                                                                                                                                                                                                                                                                              |
| A description of all resources used,                                                                                                                                                                                                                                                                                                                                                                                               |                                                                                                                                                                                                                                                                                                                                                                                                                                                                                                                                                                                                                                                                                                                                                                                                                                                                                                                                                                                                                                                                                                                                                                                                                                                                                                                                                                                                                                                                                                                                                                                                                                                                                                                                                                                                                                                                                                                                                                                                                                                                                                                                                                                                                                                                                                                                                                                                                                                                                                                                                                  |

|                                                                                                                                                                                                                                                                                                                                                                                                                                                                                                                                                         |            |
|---------------------------------------------------------------------------------------------------------------------------------------------------------------------------------------------------------------------------------------------------------------------------------------------------------------------------------------------------------------------------------------------------------------------------------------------------------------------------------------------------------------------------------------------------------|------------|
| <p>including antibodies, cell lines, animals and software tools, with enough information to allow them to be uniquely identified, should be included in the Methods section. Authors are strongly encouraged to cite <a href="#">Research Resource Identifiers</a> (RRIDs) for antibodies, model organisms and tools, where possible.</p> <p>Have you included the information requested as detailed in our <a href="#">Minimum Standards Reporting Checklist</a>?</p>                                                                                  |            |
| <p><b>Availability of data and materials</b></p> <p>All datasets and code on which the conclusions of the paper rely must be either included in your submission or deposited in <a href="#">publicly available repositories</a> (where available and ethically appropriate), referencing such data using a unique identifier in the references and in the “Availability of Data and Materials” section of your manuscript.</p> <p>Have you have met the above requirement as detailed in our <a href="#">Minimum Standards Reporting Checklist</a>?</p> | <p>Yes</p> |

[Click here to view linked References](#)

1 **The integrated respiratory microbial gene catalogue facilitate the understanding**

2 **of microbial aetiology in *Mycoplasma pneumoniae* pneumonia**

3 **Running Title: Airway microbial gene set and altered microbiome**

4 ~~Heping Wang\*, Department of Respiratory Diseases, Shenzhen Children's Hospital,~~

5 ~~Shenzhen 518026, China; szetgmy@163.com~~

6 Wenkui Dai\*, Department of Computer Science, City University of Hong Kong, Hong

7 Kong 999077, China; daiwenkui84@gmail.com

8 Heping Wang\*, Department of Respiratory Diseases, Shenzhen Children's Hospital,

9 Shenzhen 518026, China; szetgmy@163.com

10 Dongfang Li\*, Wuhan National Laboratory for Optoelectronics, Huazhong University

11 of Science and Technology, No. 1037 Luoyu Road, Wuhan 430074, China;

12 loveli\_biocc@163.com

13 Qian Zhou\*, Department of Microbial Research, WeHealthGene Institute, Shenzhen

14 518000, China; zhouqian@wehealthgene.com

15 Xin Feng, Department of Microbial Research, WeHealthGene Institute, Shenzhen

16 518000, China; fengxin@wehealthgene.com

- 17 Zhenyu Yang, Department of Microbial Research, WeHealthGene Institute, Shenzhen  
18 518000, China; yangzhy@wehealthgene.com
- 19 Wenjian Wang, Department of Respiratory Diseases, Shenzhen Children's Hospital,  
20 Shenzhen 518026, China; dnbk2005@163.com
- 21 Chuangzhao Qiu, Department of Microbial Research, WeHealthGene Institute,  
22 Shenzhen 518000, China; qiuchzh@wehealthgene.com
- 23 Zhiwei Lu, Department of Respiratory Diseases, Shenzhen Children's Hospital,  
24 Shenzhen 518026, China; luzhiwei1950@163.com
- 25 Ximing Xu, Institute of Statistics, Nankai University, No. 94 Weijin Road, Tianjin  
26 300071, China; ximing@nankai.edu.cn
- 27 Mengxuan Lyu, Department of Computer Science, City University of Hong Kong,  
28 Hong Kong 999077, China; mengxualv2-c@my.cityu.edu.hk
- 29 Gan Xie, Department of Respiratory Diseases, Shenzhen Children's Hospital,  
30 Shenzhen 518026, China; xiegan1987@163.com
- 31 Yinhu Li, Department of Microbial Research, WeHealthGene Institute, Shenzhen  
32 518000, China; liyh@wehealthgene.com

33 Yanmin Bao, Department of Respiratory Diseases, Shenzhen Children's Hospital,

34 Shenzhen 518026, China; baoyanming1978@163.com

35 Yanhong Liu, Department of Microbial Research, WeHealthGene Institute, Shenzhen

36 518000, China; liuyanhong@wehealthgene.com

37 ~~Qin Yang, Department of Respiratory Diseases, Shenzhen Children's Hospital,~~

38 ~~Shenzhen 518026, China; 6468633@qq.com~~

39 Kunling Shen, Department of Respiratory Diseases, Beijing Children's Hospital,

40 Beijing 100045, China; Department of Respiratory Diseases, Shenzhen Children's

41 Hospital, Shenzhen 518026, China; kunlingshen1717@163.com

42 Kaihu Yao, Department of Respiratory Diseases, Beijing Children's Hospital, Beijing

43 100045, China; Department of Respiratory Diseases, Shenzhen Children's Hospital,

44 Shenzhen 518026, China; jiuju2655@sina.com

45 ~~Yongshun Shen~~Xikang Feng, Department of ~~Pediatrics, Shenzhen Dapeng District~~

46 ~~Maternity&Child Healthcare Hospital, No.149 Xindong Road, Shenzhen~~

47 ~~518116~~Computer Science, City University of Hong Kong, Hong Kong 999077, China;

48 ~~shenyongshun@sina.com~~xikangfeng2-c@my.cityu.edu.hk

49 ~~Ke Zhou<sup>#</sup>, Wuhan National Laboratory for Optoelectronics, Huazhong University of~~  
50 ~~Science and Technology, No. 1037 Luoyu Road, Wuhan 430074, China;~~  
51 ~~k.zhou@hust.edu.cn~~

52 Yonghong Yang<sup>#, ✉</sup> Department of Respiratory Diseases, Beijing Children's Hospital,  
53 Beijing 100045, China; Department of Respiratory Diseases, Shenzhen Children's  
54 Hospital, Shenzhen 518026, China; Department of Microbial Research,  
55 WeHealthGene Institute, Shenzhen 518000, China; yyh628628@sina.com

56 Shuaicheng Li<sup>#, ✉</sup> Department of Computer Science, City University of Hong Kong,  
57 Hong Kong 999077, China; shuaicli@cityu.edu.hk

58 Ke Zhou<sup>#</sup>, Wuhan National Laboratory for Optoelectronics, Huazhong University of  
59 Science and Technology, No. 1037 Luoyu Road, Wuhan 430074, China;  
60 k.zhou@hust.edu.cn

61 Yuejie Zheng<sup>#</sup> Department of Respiratory Diseases, Shenzhen Children's Hospital,  
62 Shenzhen 518026, China; shine1990@sina.com

63 \*These authors contributed equally to this work.

64 #Corresponding authors

65 **Abstract**

66 **Background:** An imbalanced respiratory microbiota has been observed in pneumonia  
67 which caused high morbidity and mortality in childhood. Respiratory metagenomic  
68 analysis demands a comprehensive microbial gene catalogue which will significantly  
69 advance our understanding of host-microbiota interactions. **Results:** In this study, we  
70 collected 334 respiratory microbial samples from 171 healthy children and 76  
71 pneumonia children. The established respiratory microbial gene catalogue (RMGC)  
72 comprised 2.25 million non-redundant microbial genes covering 90.52% prevalent  
73 genes. The core microbial species in the oropharynx (OP) of the healthy children  
74 mainly comprised *Prevotella* and *Streptococcus*. The OP microbial diversity and gene  
75 number in children with *Mycoplasma pneumoniae* pneumonia (MPP) decreased  
76 compared to that in healthy children, and the concurrence network of OP microbiota  
77 in patients is featured by simple concurrence network mediated by *Staphylococcus*  
78 *spp.* and *M. pneumoniae*. Functional orthologues, which are associated with the  
79 metabolism of various lipids, membrane transport and signal transduction,  
80 accumulated significantly in the OP microbiome of sick children. Among fourteen

81 ~~reconstructed microbial genomes, *M. pneumoniae* didn't contain~~

82 ~~macrolides/beta-lactam-antibiotic~~Several antibiotics-resistance genes (ARGs) ~~which~~

83 ~~correlated with clinical medication, but these ARGs and virulence-factor genes (VFGs)~~

84 were identified in *M. pneumoniae* as well as other 13 microbial ~~genomes-draft~~

85 ~~genomes, which were reconstructed via metagenomic data. Though the common~~

86 ~~macrolides/beta-lactam-resistance genes were not identified in assembled *M.*~~

87 ~~*pneumoniae* genome, a SNP mutation (A2063G) related with macrolides resistance~~

88 ~~was identified in 23S rRNA gene.~~ **Conclusions:** This study will facilitate exploring

89 unknown microbial components and host-microbiota interaction in respiratory

90 microbiome studies as well as render further insights into the microbial aetiology of

91 MPP.

## 92 **Keywords**

93 Pneumonia; *Mycoplasma pneumoniae*; Oropharynx; Microbiome; Respiratory

94 microbial gene catalogue

## 95 **Background**

96 Studies have identified the indispensable respiratory microbiota<sup>[1-5]</sup> and its imbalance

Formatted

Formatted

Formatted

97 in pneumonia<sup>[6, 7]</sup>, which is a ~~leading cause of high morbidity and mortality in Chinese~~  
98 ~~children, leading cause of high morbidity and mortality<sup>[8, 9]</sup> worldwide, especially in~~  
99 ~~children under 5 years<sup>[10, 11]</sup>. In recent years,~~ *Mycoplasma pneumoniae* pneumonia  
100 (MPP) represents increasing cases in Chinese children<sup>[8][12]</sup> and microbial aetiology  
101 remains to be explored. Our previous studies unravelled altered respiratory microbiota  
102 in children with MPP<sup>[9, 10][13, 14]</sup>.  
103 However, ~~the present~~current respiratory microbiome (RM) studies have mainly  
104 focused on 16S rRNA analysis<sup>[6, 7, 11, 12][15, 16]</sup> which merely provides cues about known  
105 bacterial components at the genus level. Emerging studies that applied a 16S rRNA  
106 analysis have revealed the imbalanced microbial structure in the respiratory tracts of  
107 children with pneumonia<sup>[7, 13, 14][17, 18]</sup>, but changes in the microbial functions and  
108 ~~strains~~species-level microbial components in the RM of patients with MPP remain  
109 unexplored. In addition, current multi-omics studies are limited to explorations of  
110 known bacterial genomes in the RM<sup>[11][15]</sup>. Nevertheless, the RM includes a high  
111 proportion of unknown microbial species<sup>[1-3, 5, 6]</sup> which require further exploration.

112 A comprehensive catalogue of reference genes is crucial for in-depth functional

113 metagenomic analysis such as species/gene profiling, microbial biomarkers and  
114 functional annotation. Given that the RM varies with the environment<sup>[15][19]</sup>, age<sup>[1, 2, 4]</sup>  
115 and disease<sup>[6, 7, 11, 12][15, 16]</sup>, we selected the nasopharynx (NP), oropharynx (OP) and  
116 lung samples from 76 children with pneumonia and OP samples from 171 healthy  
117 children in China to establish an integrated ~~respiratory microbial gene catalogue~~  
118 ~~(RMGC)~~ and study the imbalanced RM in Chinese children with MPP. Using this  
119 catalogue, we assessed the microbial components and functions in the OP microbiome  
120 of healthy and MPP children as well as the characteristics of recovered microbial  
121 genomes.

## 122 **Data Description**

123 From 3 July to 27 August 2016, patients were recruited from the hospitalization zone  
124 in the Department of Respiratory Diseases of Shenzhen Children's Hospital. Inclusion  
125 criteria for patients consisted of characteristic chest radiographic abnormalities  
126 consistent with pneumonia, the exclusion of asthma, and the clearance of respiratory  
127 infections or exposure to antibiotics within one month prior to sampling (Table 1). We  
128 collected NP (25-800-A-50, Puritan, Guilford, ME, USA) and OP (155C, COPAN,

129 Murrieta, CA, USA) swabs from 76 hospitalized patients within 24 hours after  
130 hospitalization and before the administration of antibiotics. Bronchoalveolar lavage  
131 fluids (BALFs) were collected 2 to 15 days after hospitalization (Supplementary  
132 Table 1).

133 Healthy children were recruited during physical examination in summer of 2016  
134 (from July to August) in Shenzhen. OP swabs were collected from 171 healthy  
135 children who met the following inclusion criteria: no diagnosis of asthma or a family  
136 history of allergy; no history of pneumonia; a lack of wheezing, fever, cough or other  
137 respiratory/allergic symptoms at sampling one month prior to the study and one week  
138 after sampling; no exposure to antibiotics one month prior to sampling.

139 All samples were collected by an experienced clinician. Samples were stored at  
140  $-80^{\circ}\text{C}$  within 20 minutes after collection and DNA was extracted within 10 days of  
141 the sampling. A TGuide S32 Magnetic Swab Genomic DNA Kit (DP603-T2,  
142 TIANGEN Biotech (Beijing) Co., Ltd., Beijing, China, <http://www.tiagen.com/en/>)  
143 was utilized to extract the DNA and metagenomic sequencing was performed on the  
144 Illumina Hi-Seq platform (San Diego, USA) in terms of the manufacturer's

145 instructions. Unused swabs and DNA extraction kits from the same batch served as  
146 negative controls to assess DNA contamination.

## 147 **Analyses**

### 148 **Sample information and data output**

149 Two hundred forty-seven children aged <13 years were enrolled in this study (Table 1  
150 and Supplementary Table 1). After removing host contamination and low-quality data,  
151 metagenomic sequencing produced ~~476.62 Gbp data~~4,765,288,986 read numbers with  
152 an average of ~~4.43 Gbp~~14,267,332 read numbers per sample. DNA concentration of  
153 unused sampling swabs and DNA extraction kits was lower than 0.01 ng/μl, whereas  
154 the DNA concentration was higher than 80 ng/μl in sampling swabs and BALF.  
155 Furthermore, the DNA amplification results of extracted bacterial DNA were less than  
156 0.01 nmol/l for the enveloped sampling or extraction materials (Supplementary Figure  
157 1).

### 158 **Construction of the RMGC**

159 By applying metagenomics sequencing data from 247 children and three resources of  
160 respiratory related ~~bacteria~~microbial genomes/genes (Figure 1), we constructed a

161 comprehensive RMGC with 2,245,343 non-redundant ORFs and it was freely  
162 accessible through our website  
163 ([https://rmgc.deepomics.org/respiratory\\_microbial\\_gene\\_catalogue/](https://rmgc.deepomics.org/respiratory_microbial_gene_catalogue/)). The total  
164 length of the ORFs in the RMGC was 1.71 Gbp and the average length was 760 nt,  
165 ranging from 102 to 32,241 nt. We selected 241 samples with  $\geq$ 650 Mb data to  
166 examine the coverage of the microbial genes in the RMGC. In accordance with the  
167 rarefaction curve, 90.52% of prevalent microbial genes were captured in the RMGC  
168 (Figure 2a and b).

#### 169 **Taxonomic assessment and functional annotation of the RMGC**

170 Based on taxonomic profiling, 1,281,673 genes (57.08% of RMGC) were assigned to  
171 phyla and 1,143,382 genes (50.92% of RMGC) were assigned to genera, representing  
172 56.58% and 51.75% of the sequencing reads respectively. A total of 617,968 genes  
173 (25.92% of RMGC) were annotated to known bacterial species, representing 33.49%  
174 of the sequencing reads. The phyla Firmicutes, Bacteroides, Proteobacteria,  
175 Actinobacteria and Fusobacteria dominated the RMGC while the prevalent microbial  
176 genera included *Staphylococcus*, *Streptococcus*, *Haemophilus*, *Corynebacterium*,

177 *Dolosigranulum*, *Prevotella*, *Blautia*, *Rothia*, *Porphyromonas*, *Lactobacillus*,  
178 *Veillonella*, *Fusobacterium* and *Leptotrichia*. Unknown microbial species accounted  
179 for 9.62% to 55.50% of the RMGC and the detailed taxonomic information of RMGC  
180 was deposited on our website.

181 The genus-level microbial structure revealed by metagenomic analysis resembled  
182 the results of the 16S rRNA analysis (Supplementary Figure 2). Notably, a greater  
183 proportion of microbial genera remained unclassified in the metagenomic analysis  
184 than in the 16S rRNA analysis, which might be attributed to the wide detection by  
185 metagenomics sequencing and limited reference microbial genomes.

186 By aligning RMGC to KEGG database, a total number of 6,408 ~~KOs~~KEGG  
187 Orthology (KO) were identified, including 853,446 genes representing 37.85% of the  
188 total sequencing data. Known microbial functions (annotated by KEGG) saturated  
189 quickly to 6,346 groups as more samples were included (Figure 2c). Combined novel  
190 gene families, the rarefaction curve plateaued when 12,924 groups were detected  
191 (Figure 2c). Upon alignment to the eggNOG database, 53.95% of the genes in the  
192 RMGC were assigned to known functional categories.

193 **Core microbial species in OP microbiome of healthy children**

194 We ~~totally~~ acquired 67 core species in total in 5 dominant phyla Bacteroidetes,  
195 Firmicutes, Proteobacteria, Actinobacteria and Fusobacteria (Figure 3). *Prevotella*  
196 *melaninogenica* (4.38±2.91%, mean±sd), *Prevotella sp.* (3.06±1.92%), *Prevotella*  
197 *histicola* (3.23±3.58%), *Prevotella pallens* (2.31±1.88%) and *Veillonella atypical*  
198 (1.60±1.44%) were the top 5 microbial species. In addition, *Streptococcus*  
199 *pseudopneumoniae* (1.26±0.96%), ~~H.~~ *Haemophilus influenzae* (0.60±0.68%),  
200 ~~S.~~ *Streptococcus pneumoniae* (0.60±0.50%), *Haemophilus parainfluenzae*  
201 (0.42±0.49%) and ~~S.~~ *Staphylococcus aureus* (0.27±1.52%), which were generally  
202 defined as opportunistic pathogens, were also prevalent in OP microbiome of healthy  
203 children (Figure 3).

204 **Microbial structure and functions in OP microbiome of MPP patients differed**  
205 **from that in healthy children**

206 Based on the PERMANOVA, pneumonia onset is the most significant factor (adjust  
207 *p*-value <0.001) explaining the variations in OP microbial samples, followed by feed  
208 pattern (adjust *p*-value = 0.037) and age (adjust *p*-value = 0.048). Compared with

209 healthy children, MPP patients exhibited significantly decreased microbial gene  
210 number and alpha diversity of the OP microbiome (Figure 4a and b). Moreover, thirty  
211 Co-Abundance gene Groups (CAGs) accumulated significantly in the OP microbiome  
212 of MPP patients, comprising 6 unknown and 24 known microbial species which were  
213 primary respiratory pathogens such as *M. pneumoniae*, *Staphylococcus epidermidis*  
214 and *S. aureus* (Figure 5a). Ninety-five CAGs were enriched in the OP microbiome of  
215 healthy children including prevalent colonizers such as *Prevotella* species (Figure 5a).  
216 The microbial co-occurrence networks in MPP patients were simpler than that in  
217 healthy children and negative correlations were only identified between  
218 health-enriched and MPP-enriched CAGs (Figure 5a). For example, health-enriched  
219 *Prevotella spp.* were negatively correlated with MPP-enriched *S. epidermidis* ( $r < -0.60$ ,  
220 adjust  $p$ -value  $\leq 0.05$ , Figure 5a).

221 By comparing functional annotations via KEGG annotation (Supplementary  
222 Table 2), we assessed the functional alterations of the OP microbiome in patients with  
223 MPP. Microbial functions which related to lipid metabolism, membrane transport and  
224 signal transduction were slightly enriched in MPP patients (Figure 5b). In contrast, the

225 OP microbiome of healthy children was significantly enriched in  
226 ~~orthologues~~orthologous involved in glycan biosynthesis and metabolism, biosynthesis  
227 of secondary metabolites, and cell growth and death (Figure 5b and Supplementary  
228 Table 2). Host homeostatic associated functions, such as immune system, digestive  
229 system, circulatory system and environmental adaptation were also significantly  
230 abundant in the OP microbiome of healthy children (Figure 5b and Supplementary  
231 Table 2).

### 232 **Characterization of the *M. pneumoniae* genome and other 13 re-constructed** 233 **microbial genomes**

234 We re-assembled 14 qualified microbial CAGs (Supplementary Table 3) which  
235 represented *M. pneumoniae* genome (0.80 Mbp) and 13 other microbial genomes  
236 (genome sizes averaged 2.30 Mbp). The *M. pneumoniae* genome accumulated  
237 significantly in OP microbiome of MPP patients and exhibited high similarity with  
238 reference genome (97.79% of genome coverage) (Supplementary Table 3). *M.*  
239 *pneumoniae* genome consisted of 4 antibiotic-resistance genes (ARGs) with common  
240 antibiotics, including peptide, rifamycin and fluoroquinolone antibiotics (Figure 6,

241 Supplementary Table 4) ~~while~~. On the other hand, SNP mutation A2063G related to  
242 macrolides-resistance was identified in 23S rRNA gene in 8 MPP children patients,  
243 who were given experimental macrolides or beta-lactams such as azithromycin,  
244 erythromycin or sulbactam (Supplementary Table 1). In addition, there were 136  
245 virulence-factor genes (VFGs) along its reassembled genome sequence  
246 (Supplementary Table 5) and the redundant VFGs of *M. pneumoniae* enriched in the  
247 secretion of adhesin P1, cytoadherence protein and community-acquired respiratory  
248 distress syndrome (CARDS) toxin (Figure 6 and Supplementary Table 5).

249 Among other 13 microbial genomes, 5 of them can be designated specific species,  
250 one just be annotated at genus level (*Ralstonia*) and the rest 7 were novel microbial  
251 genomes (averaged 1.74 Mbp) (Supplementary Table 3). For the 5 annotated  
252 microbial species, *S. aureus* and *S. epidermidis* increased significantly in MPP  
253 patients while the other 3 *Prevotella spp.* mainly accumulated in healthy children  
254 (Figure 7, Supplementary Table 3). The largest reassembled *Ralstonia* genome  
255 (5.89Mbp) carried numerous ARGs, including 13 beta-lactam antibiotic genes, 21  
256 tetracycline antibiotic genes, and 11 macrolide antibiotic genes. *P. histicola*, *P. shahii*

257 and CAG00068 all had one copy of macrolide antibiotic resistance and beta-lactam  
258 antibiotic resistance gene. These genomes also harboured abundant resources of  
259 VFGs which ranged from 105 to 808 copies of relative genes. According to the  
260 correlation analysis, we didn't identify the significant correlation between 14  
261 reassembled microbial genomes and 5 clinical indexes (Supplementary Table 6).

## 262 **Discussion**

263 MPP has been causing the increasing morbidity and mortality in Chinese children.  
264 The development of RM studies has improved our understanding of the microbial  
265 aetiology of MPP by revealing infection-associated RM imbalances<sup>[9, 10]</sup>[\[13, 14\]](#).

266 However, microbial functions and host-microbiota interactions in the RM of patients  
267 with MPP remain to be explored, particularly those from novel microbial ~~strains.~~  
268 ~~species.~~

269 In recent years, several reference gut microbial catalogues were constructed to  
270 promote understanding of the host-microbe interaction. Qin *et al.* built a global view  
271 of the human gut microbiome (GM) and revealed a comprehensive functional  
272 potential of the prevalent gut microbial genes<sup>[20]</sup>. Li *et al.* upgraded the gut gene

273 catalogue in 2014<sup>[21]</sup>, enabling the studies of association of the microbial genes with  
274 human health. Based on these frameworks, researchers could deepen the  
275 understanding of the correlation between GM and various diseases, such as  
276 gastrointestinal and cardiovascular diseases<sup>[22, 23]</sup>.

277 Similar to reference gene catalogues of the ~~gut microbiome (GM)<sup>[16-18]</sup>~~ the GM,  
278 RMGC will further understanding of microbial aetiology in respiratory diseases. The  
279 development of a well-established RMGC in this study is crucial for the functional  
280 metagenomics analysis to improve our ~~understanding of knowledge about~~  
281 host-microbiota interactions in MPP. By aligning metagenomics data directly with the  
282 established RMGC, ~~we profiled~~ researchers could profile all microbial species as well  
283 as explore microbial functions in both known and unknown microbial species. The  
284 similar microbial ~~species to that identified in the~~ assignment between RMGC-based  
285 and 16S rRNA analysis, ~~suggesting also suggested~~ promising taxonomic assignments  
286 ~~based on these~~ via our constructed gene sets. The core microbial species of OP  
287 microbiota in healthy children ~~founded a reliable reference to~~ will provide a ~~standard~~  
288 ~~control database reference~~ for exploring microbial as well as host-microbe

289 ~~interactions in~~ RM study<sup>[19][24]</sup> ~~and mine the potential beneficial bacteria~~<sup>[20]</sup>. In  
290 general, RMGC furnishes a comprehensive respiratory associated microbial profile to  
291 forward the microbiome analysis at species/~~strain~~ level and the functional profiling  
292 will facilitate in-depth multi-omics analyses<sup>[21, 22][25, 26]</sup>, such as associations of  
293 produced proteins or metabolites with known and novel microbial genomes. This  
294 capability would clarify the interactions between the host and the RM alteration  
295 during MPP progression. \_

296 —The OP microbiome of MPP children changed to be simpler structure  
297 compared to that of healthy children. Previous studies revealed that bacteria-like *M.*  
298 *pneumoniae* could deplete bacteria through direct competition and activate the  
299 bacterial clearance factors in host responses<sup>[23, 24][27, 28]</sup>, which led to decreased  
300 colonizer *Prevotella spp.*<sup>[25][29]</sup> and pathogens proliferation such as *S. aureus* and *S.*  
301 *epidermidis*. The MPP patient-enriched gene functions involved in membrane  
302 transport and various nutrients metabolism which could partly explain reduced tight  
303 junction proteins and increased respiratory mucosa permeability after infection<sup>[26][30]</sup>.

304 In addition, a number of studies have identified an increased glucose concentration in

Formatted: Indent: First line: 0.29"

305 airway surface liquids<sup>[27-29][31-33]</sup> and associated pathogen proliferation<sup>[30][34]</sup>, which  
306 also corroborate the enriched nutrients uptake pathways in OP microbiome of MPP  
307 patients. Though the mechanism of *M. pneumoniae* clearance in respiratory system  
308 remains unclear, these findings would render a new insight into host-microbiota  
309 interactions in MPP infection.

310 ~~Except for well-known microbes, respiratory tracts also harboured a variety of~~  
311 ~~undiscovered microbial species<sup>[34]</sup>. Moreover, recent reports had proved that single~~  
312 ~~bacterial genome could be well recovered via reference gene sets and metagenomics~~  
313 ~~data~~ Except for well-known microbes, respiratory tracts also harboured a variety of  
314 undiscovered microbial species<sup>[35]</sup>. Moreover, recent reports had proved that single  
315 bacterial genome could be well recovered via reference gene sets and metagenomics  
316 data<sup>[32-33][36, 37]</sup>. Culturing of *M. pneumoniae* is rarely and difficultly used in clinical  
317 diagnosis, limiting the understanding of antibiotics resistance and virulence<sup>[34][38]</sup> in *M.*  
318 *pneumoniae*. Re-construction of ~~a high quality *M. pneumoniae* genome by employing~~  
319 ~~RMGC and metagenomic data indicated various ARGs which were related to RNA~~  
320 ~~transcription<sup>[35]</sup>, DNA replication<sup>[36]</sup> and protein synthesis<sup>[37]</sup>.~~ the *M. pneumoniae*

321 genome by employing RMGC and metagenomic data indicated various ARGs which  
322 were related to RNA transcription<sup>[39]</sup>, DNA replication<sup>[40]</sup> and protein synthesis<sup>[41]</sup>.  
323 According to clinical practice guidelines<sup>[38-40][42-44]</sup> and ARGs existence, most of MPP  
324 children were treated with azithromycin, erythromycin or sulbactam which were not  
325 associated with identified ARGs in *M. pneumoniae* genome. Increasing reports  
326 demonstrated that the specific dominated bacteria associated with severe acute  
327 respiratory infections (ARIs)<sup>[6, 41, 42][45, 46]</sup>, but no meaningful correlations were  
328 identified between disease severity and *M. pneumoniae*, as well as other reassembled  
329 bacteria in OP microbiome of MPP patients. This was also identified by our previous  
330 studies which confirmed the succession of *M. pneumoniae* infection in NP to OP and  
331 lung as well as the association of *M. pneumoniae* load in the lung microbiota with  
332 disease severity<sup>[10][14]</sup>.

333 Though no macrolide/beta-lactam resistance genes were ~~identified~~discovered in  
334 *M. pneumoniae* genome, one SNP mutation (23S RNA, 2063A->G) correlated to  
335 macrolide resistance were identified in MPP patients. Meanwhile, the patient-enriched  
336 microbial genomes such as *Ralstonia*, consisted plenty of ARGs related to the

337 resistance to macrolide, beta-lactam and tetracycline. Given rigorous antibiotic  
338 selective pressure and complex microbial interaction, the environmental redundant  
339 genetic components would rapidly transferred into the pathogen genome by horizontal  
340 gene transfer<sup>[43, 44][47, 48]</sup> and caused several emergence diseases, such as European  
341 enterohemorrhagic *Escherichia coli* breakout<sup>[45][49]</sup> and emergence of scarlet fever  
342 *Streptococcus pyogenes* in Hong Kong<sup>[46][50]</sup>. Considering above-mentioned  
343 researches, we should recognize that current medications for the *M. pneumoniae*  
344 treatment hold the potential to trigger emerging drug-resistance microbial  
345 ~~strains~~species in *M. pneumoniae* or other novel microbial ~~strains~~species, such as  
346 reported macrolide-resistance- in *M. pneumoniae*-PCR-positive children<sup>[47-49][51-53]</sup>.  
347 The OP microbiome also recovered several healthy enriched bacterial genomes,  
348 among which *Prevotella spp.* played as key players in OP microbiome of healthy  
349 children<sup>[50, 54][54, 55]</sup> and other novel microbes might function as pathogen competitors  
350 such as *Vampirovibrio*<sup>[52][56]</sup>. In general, recovered microbial genomes in respiratory  
351 tracts hold the potential to improve the understanding of microbial aetiology in MPP  
352 pneumonia.

353 There are several limitations to be clarified in this study. Given no efficient  
354 medicines for MPP, the inpatients accepted empirical treatments and might shift the  
355 airway ecology slightly<sup>[53][57]</sup>. Despite the promising application of the RMGC,  
356 unclassified CAGs and novel gene families in RMGC must be annotated and further  
357 explored. The copy numbers of several genes need further assessment due to potential  
358 inaccuracy caused by the low respiratory bacterial biomass, NGS sequencing and  
359 assembly methods. The respiratory microbial samples were obtained from Chinese  
360 children in this study, and more metagenomics data will be incorporated into the  
361 RMGC in the future to construct a broader characterization of microbial components  
362 and functions, as the continual updates of the GM reference genes<sup>[16-18][21, 58, 59]</sup>. This  
363 procedure will incrementally improve studies of the imbalanced RM in patients with  
364 respiratory diseases. Alterations in the OP microbiome in Chinese patients with MPP  
365 will also provide extensive insights into the microbial aetiology of acute respiratory  
366 infection.

### 367 **Potential implications**

368 Established respiratory microbial gene catalogue will ensure deepen respiratory  
369 micro-ecology research, which holds the promise to elucidate respiratory microbial

370 community at microbial species ~~or even strain~~ level. In addition, genomes of novel  
371 microbial genera or species can be assembled through aligning metagenomics data  
372 with the reference catalogue. Exploring microbial functions and associated microbial  
373 components can construct the microbial network in respiratory microbial community.  
374 Established reference gene sets can be employed to deepen multi-omics analysis,  
375 which will further the understanding of host-microbiota interactions in acute  
376 respiratory infection. Comparing oropharynx microbiome between healthy and  
377 diseased children also provides an example for the utilization of the gene sets.

#### 378 **Methods**

#### 379 **Ethics statement**

380 We obtained approval for this study from the Ethical Committee of Shenzhen  
381 Children's Hospital (Shenzhen, Guangdong Province, China) under registration  
382 number 2016013 and performed experiments under the relevant guidelines and  
383 regulations. All guardians of selected children provided the informed consents.

#### 384 **Clinical detection of infectious pathogens**

385 BALF was employed to establish the common clinical microbial diagnosis. Culturing  
386 was conducted to detect ~~*Streptococcus*~~*S. pneumoniae*, ~~*Haemophilus influenzae*~~*H.*  
387 *influenzae*, *Moraxella catarrhalis*, ~~*Staphylococcus*~~*S. aureus* and *Staphylococcus*

388 *haemolyticus*. The D3 Ultra DFA Respiratory Virus Screening & ID Kit (Diagnostic  
389 Hybrids, Inc., Athens, OH, USA) was employed to detect common viruses, including  
390 adenovirus (AdV), respiratory syncytial virus (RSV), influenza virus and  
391 parainfluenza virus. Cytomegalovirus (CMV) and Epstein-Barr virus (EBV) were  
392 detected via the Diagnostic Kit for Quantification of Human CMV DNA and EBV  
393 Polymerase Chain Reaction (PCR) Fluorescence Quantitative Diagnostic Kit,  
394 respectively (DaAnGene, Guangzhou, China, <http://daan.joomcn.com/>). *M.*  
395 *pneumoniae* and *Chlamydia pneumoniae* were diagnosed via the  
396 diagnostic kit for *M. pneumoniae* DNA (PCR Fluorescence Probing) (DaAnGene)  
397 and Anti-*C. pneumoniae* ELISA (IgM) (EUROIMMUN AG, Lübeck, Germany)  
398 respectively.

#### 399 **Construction and annotation of the RMGC**

400 Sequencing data were filtered using a previously reported method<sup>[54][60]</sup> and each  
401 sample with  $\geq 650$  Mbp data (Figure 1, [Supplementary Figure 3](#)) was selected for  
402 genome assembly by SOAPdenovo<sup>[55][61]</sup> (v2.07, -F -K 39 -M 3 -d 1). For samples  
403 with  $< 650$  Mbp data, the data from the same respiratory site were mixed and

404 assembled (Figure 1). Assembled contigs with  $\geq 500$  bps were selected for gene  
405 prediction with MetaGeneMark<sup>[62]</sup> (v3.26, default parameters). We applied  
406 Glimmer3.02<sup>[63]</sup> (default parameters) to predict genes from the 1,384 respiratory  
407 bacterial genomes in the IMG database (2016-12-21, <https://img.jgi.doe.gov/>). Gene  
408 sequences were also retrieved from the genomes of 73 respiratory bacteria in PATRIC  
409 database (2017-3-25, <https://www.patricbrc.org/>) and 450,204 open reading frames  
410 (ORFs) of respiratory bacteria in Human Microbiome Project (HMP). Genes with  $\geq$   
411 100 bp length and without Ns were selected to construct non-redundant gene sets  
412 using CD-HIT<sup>[64]</sup> (v4.66, -c 0.95 -aS 0.9). Genes with  $\geq 2$  mapped reads were  
413 retained in the established RMGC.

414 The taxonomic annotation of genes was conducted in the light of the following  
415 steps: i) we retrieved bacterial and viral genome sequences from IMG (2016-12-21),  
416 NCBI (2016-08-09) and PATRIC (2017-03-25) databases. We selected the genome  
417 sequence with the longest N50 as the representative genome for each bacterial species.

418 Non-redundant viral genomes were produced by CD-HIT (v4.66, -aS 0.95 ~~-AL 0.9~~  
419 ~~-aL 0.9 -AS 0.95 -M 0~~). We aligned the gene sets in the RMGC to 6,869

420 representative bacterial genomes and 18,916 non-redundant viral DNA genomes using  
421 BLASTN (v2.5.0, default parameters except  $-e$  0.01); ii) we retained the top 10%  
422 highest-scoring alignments of each gene, with  $\geq 65\%$  identity and  $\geq 80\%$  coverage  
423 of gene length; and iii). The assignment of each gene was determined based on  $\geq 50\%$   
424 consensus above the similarity threshold for a specific rank:  $\geq 65\%$  for phylum,  $\geq$   
425 85% for genus and  $\geq 95\%$  for species.

426 The functional annotation of each gene was determined by searching protein  
427 sequences in Kyoto Encyclopedia of Genes and Genomes (KEGG) (v78.1) and  
428 eggNOG (version 4.0) with BLASTP (v2.5.0, default parameters, except ~~for  $-e$  value~~  
429  ~~$1e-5$ ). The best hit alignment (identity  $\geq 30\%$  and coverage  $\geq 70\%$ ) was selected as~~  
430 ~~the functional annotation for the gene. Genes without annotations in KEGG were~~  
431 ~~identified as novel gene families by the Markov Cluster Algorithm (MCL)<sup>[59]</sup>  $-e$   $1e-5$ ).~~  
432 The best-hit alignment (identity  $\geq 30\%$  and coverage  $\geq 70\%$ ) was selected as the  
433 functional annotation for the gene. Genes without annotations in KEGG were  
434 identified as novel gene families by the Markov Cluster Algorithm (MCL)<sup>[65]</sup>  
435 (inflation factor=1.1, bit-score cut-off=60).

436 **Comparing the taxonomic assessment between 16S rRNA gene analysis and**  
437 **metagenomic analysis**

438 We selected 72 OP microbial samples with  $\geq 650$  Mb metagenomic sequencing data  
439 and aligned the sequencing data to establish RMGC to determine taxonomic  
440 assignments. The same samples were also sequenced via V3-V4 region of the 16S  
441 rRNA gene<sup>[94][13]</sup>. Microbial compositions were compared between two methods to  
442 assess the accuracy of taxonomic assignments via metagenomic analysis.

443 **Rarefaction analysis**

444 We downsized the number of mapped reads to 3 million for each sample to eliminate  
445 the variable influence caused by the amount of sequencing data. Estimation of total  
446 gene richness was done by randomly sampling five individuals 1,000 times with gene  
447 counting and Chao2 richness estimator<sup>[60][66]</sup>.

448 For the rarefaction curve of KEGG orthologous groups (KOs) and novel gene  
449 families, random sampling of five individuals for 1,000 times was used to evaluate  
450 saturation. Relative rarefaction curves were visualized using R software (v3.3.2).

451 **Calculation of gene relative abundance in RMGC**

452 All filtered reads of metagenomics data from each sample were aligned to the  
453 established RMGC using BWA (v0.7.13, default parameters, except for the mem and  
454 identity  $\geq 95\%$ ). Alignments that met the following two criteria were accepted: i)  
455 paired-end reads were mapped onto a same gene with the correct insert size; and ii)  
456 one end of a paired-reads was mapped onto the end of a gene, while the other was  
457 located outside of the gene.

458 If the number of genes in a given sample was  $n$ , the relative abundance was  
459 calculated using the following steps:

460 Step 1. The copy number of the gene  $i$  ( $c(i)$ ) was calculated as:

461 
$$c(i) = \frac{t(i)}{l(i)}$$

462  $t(i)$ : The total number of mapped reads of gene  $i$  in a given sample.

463  $l(i)$ : The length of the gene  $i$ .

464 Step 2. The relative abundance of gene  $i$  ( $Ab\_g(i)$ ) was defined as:

465 
$$Ab\_g(i) = \frac{c(i)}{\sum_{i=1}^n c(i)}$$

466 Step 3. If  $m$  genes can be assigned to the phylogenetic assignment  $s$ , the  
467 abundance of this phylogenetic assignment ( $Ab\_p(s)$ ) was calculated using the

468 following equation:

$$469 \quad Ab\_p(s) = \sum_{j=1}^m Ab\_g(j)$$

#### 470 **Phylogenetic and functional profile of the OP microbiome**

471 All filtered reads of the OP microbiome were aligned to the established RMGC using  
472 BWA with same parameter as above. The relative abundance of each phylogenetic  
473 assignment was calculated as showed above while the abundance of KOs in the  
474 functional profiling table was determined as described in a previous report<sup>[46][58]</sup>.

#### 475 **Identification of OP core microbial species in healthy children**

476 The microbial species was selected as core species if it existed in over 50% of healthy  
477 children and represented more than 1% relative abundance in one OP microbial  
478 sample. The distributions of core microbial species in OP of healthy children were  
479 described using ggplot2 in R.

#### 480 **Comparison of the OP microbiome between healthy children and MPP patients**

481 According to the age distributions of 34 MPP patients (data size  $\geq 650$  Mbp), 33  
482 randomized healthy children with similar age were chosen. Genes in the OP  
483 microbiome of selected microbial samples were clustered into co-abundance gene

484 groups (CAGs) via Capony-based algorithms<sup>[64][67]</sup> (default parameters). The selected  
485 CAGs which contained more than 700 genes were regarded as deriving from the same  
486 bacterial genome and selected to construct a correlation network using Spearman's  
487 rank coefficient ( $\leq -0.6$  or  $\geq 0.6$ ). The co-occurrence network was visualized using  
488 Cytoscape (v3.4.0)<sup>[62][68]</sup>. If  $\geq 50\%$  of the included genes had consensus phylogenetic  
489 annotations, corresponding CAG was assigned to a related microbial taxonomic  
490 assignments.

491 The relative abundance of each CAG in microbial samples was calculated as  
492 previously reported<sup>[18][59]</sup>. Inter-group comparisons of CAGs and KEGG functions  
493 were performed using the two-tailed Wilcoxon rank-sum test and corrected via the  
494 Benjamini-Hochberg method (adjusted  $p$ -value  $\leq 0.05$ ). Confounding factors  
495 including pneumonia, sex, age, delivery mode and feed pattern were also assessed  
496 using PERMANOVA by vegan package (v2.3-4) in R software.

#### 497 **Single microbial genome assembling from OP metagenomic data**

498 OP metagenomic data were aligned to the filtered CAGs (containing  $\geq 700$  genes) by  
499 BWA (v0.7.13, identity  $\geq 95\%$ ). The mapped reads of each CAG were extracted for

500 microbial genomes assembling with Velvet<sup>[64][69]</sup> (kmer: from 45 to 75, cov\_cutoff:  
501 auto, exp\_cov: auto). The assembled sequences with the longest contig N50 were  
502 selected as representative draft genomes. Assembly quality was assessed following six  
503 criteria<sup>[64][23]</sup>: (i) 90% of the genome assembly should be included in contigs >500 bp;  
504 (ii) 90% of the assembled bases are at >5× read coverage; (iii) contig N50 >5 kb; (iv)  
505 scaffold N50 >20 kb; (v) average contig length is >5 kb; (vi) >90% of core genes are  
506 present in the assembly. A total of 14 draft microbial genomes passed five or six  
507 criteria finally. ~~And (Supplementary Table 3). We then applied the selected assembly~~  
508 ~~quality estimation standard published by the Genomic Standards Consortium (GSC)~~  
509 ~~(Supplementary Table 3)<sup>[70]</sup>. The microbial species designation of 14 assembled~~  
510 ~~genome sequences were aligned to NCBI database to obtain their taxonomic~~  
511 ~~information via MUMmer (v3.0)<sup>[64, 65]</sup>. Furthermore, gene prediction was executed for~~  
512 ~~the assembled genomes followed these standards: 1) concordance with Glimmer3.02~~  
513 ~~while related annotations of antibiotic resistance and virulence were acquired through~~  
514 ~~CARD taxonomical assignment of CAGs<sup>[66][67]</sup> and VFDB<sup>[67]</sup>; 2) aligned to the~~  
515 ~~published genome sequences from IMG, NCBI and PATRIC via BLASTN (v2.5.0,~~

Formatted

Formatted

516 default parameters except  $-e$  0.01), with  $\geq 95\%$  nucleotide identity and  $\geq 95\%$   
517 genome coverage; 3) assigned by the CheckM(v1.0.12, default parameters) from the  
518 Genome Taxonomy DB<sup>[71]</sup>. Furthermore, gene prediction was executed with  
519 Glimmer3.02, while related annotations of antibiotic resistance and virulence genes  
520 were acquired through CARD<sup>[72]</sup> and VFDB<sup>[73]</sup>. The SNP mutation associated with  
521 macrolide resistance of *M. pneumoniae* was identified by mapping sequencing reads  
522 against 23S rRNA genes<sup>[74]</sup> using BWA.

### 523 **Correlations between reassembled microbial genomes and disease severity in**

#### 524 **MPP patients**

525 The correlation between reconstructed microbial genomes with the hospitalization  
526 duration and fever peak was assessed. In addition, serum CRP, PCT and eosinophil in  
527 24 hours after hospitalization were also selected to assess the correlation with  
528 reassembled microbial genomes via R software. The distributions of relative  
529 abundance of 14 reassembled genomes in MPP and healthy children were showed via  
530 scatter plot.

#### 531 **Availability of supporting data and materials**

532 [The BioProject ID is PRJNA413615](#). The sequencing data supporting the results of  
533 this article are available in the GenBank repository under accession number:  
534 SRP119571. The RMGC data set is available\_ in the GigaScience.

535 **Declaration**

536 **List of abbreviations**

537 AdV: adenovirus; ARI: acute respiratory infection; BALF: broncho-alveolar lavage  
538 fluid; CAGs: co-abundance gene groups; CMV: Cytomegalovirus; EBV: Epstein-Barr  
539 virus; GM: gut microbiome; KEGG: Kyoto Encyclopedia of Genes and Genomes;  
540 KOs: KEGG orthologous groups; MCL: Markov Cluster Algorithm; NP: nasopharynx;  
541 OP: oropharynx; ORFs: open reading frames; PCA: principal component analysis;  
542 PCR: Polymerase Chain Reaction; PERMANOVA: Permutational multivariate  
543 analysis of variance analysis; PP: pediatric pneumonia; RM: respiratory microbiome;  
544 RMGC: respiratory microbial gene catalogue; RSV: respiratory syncytial virus;

545 **Consent for publication**

546 All the guardians of participates consent to publish

547 **Competing Interests**

548 The authors declare no competing financial interests.

#### 549 **Funding**

550 This study was supported by ~~GuangdongKey~~ Medical ~~Research—Fund~~  
551 ~~(A2016504Disciplines Building Project of Shenzhen (SZXJ2017005))~~, Sanming  
552 Project of Medicine in Shenzhen (SZSM201512030), and Shenzhen Science and  
553 Technology Project (JCYJ20170303155012371 and JCYJ20170816170527583) ~~and~~  
554 ~~Key Medical Disciplines Building Project of Shenzhen (SZXJ2017005)-).~~

#### 555 **Authors' contributions**

556 Y.Z., Y.Y. and K.Z. managed the project. Z.L., G.X., Y.B. and Y.S. performed the  
557 sampling and information collection. W.W. and Q.Y. prepared the DNA extraction.  
558 D.L., Q.Z., X.F. and Z.Y. performed the bioinformatics analysis in this work. C.Q.,  
559 Y.L. and Y.L. optimized the graphs. X.X. and M.L. optimized the data curation. S.L.  
560 and Y.Y. guided data interpretation. H.W. and W.D. dealt the data mining and wrote  
561 the paper. K.S. and K.Y. polished the article. All authors reviewed this manuscript.

#### 562 **Acknowledge**

563 We thank suggestions from members in Collaborating Group of Pediatric Respiratory

564 Microbiome, Chinese Pediatric Society and Chinese Medical Association. We also  
565 thank Mr. Xiaofeng Lin from EasyPub for polishing language when preparing this  
566 submission.

#### 567 **Authors' information**

568 Y.Y. is a Russian academician on pediatric and vaccine research. Y.Z is the director of  
569 respiratory disease department in Shenzhen Children's Hospital. S.L is a professor of  
570 department of computer science in the City University of Computer Science. K. Z is a  
571 professor of Wuhan National Laboratory for Optoelectronics, Huazhong University  
572 of Science and Technology.

#### 573 **References**

---

- 574 1. Stearns JC, Davidson CJ, McKeon S, Whelan FJ, Fontes ME, Schryvers AB,  
575 *et al.* Culture and molecular-based profiles show shifts in bacterial  
576 communities of the upper respiratory tract that occur with age. *ISME J.* 2015;  
577 9: 1268.
- 578 2. Biesbroek G, Tsivtsivadze E, Sanders EA, Montijn R, Veenhoven RH, Keijser  
579 BJ, *et al.* Early respiratory microbiota composition determines bacterial

Formatted: Font: Not Bold

- 580 succession patterns and respiratory health in children. *Am J Respir Crit Care*  
581 *Med.* 2014; 190: 1283-92.
- 582 3. Biesbroek G, Bosch AA, Wang X, Keijsers BJ, Veenhoven RH, Sanders EA, *et*  
583 *al.* The impact of breastfeeding on nasopharyngeal microbial communities in  
584 infants. *Am J Respir Crit Care Med.* 2014; 190: 298-308.
- 585 4. Bosch AA, de Steenhuijsen Piters WA, van Houten MA, Chu M, Biesbroek G,  
586 Kool J, *et al.* Maturation of the infant respiratory microbiota, environmental  
587 drivers and health consequences: a prospective cohort study. *Am J Respir Crit*  
588 *Care Med.* 2017; 196: 1582-90.
- 589 5. Charlson ES, Bittinger K, Haas AR, Fitzgerald AS, Frank I, Yadav A, *et al.*  
590 Topographical continuity of bacterial populations in the healthy human  
591 respiratory tract. *Am J Respir Crit Care Med.* 2011; 184: 957-63.
- 592 6. de Steenhuijsen Piters WA, Huijskens EG, Wyllie AL, Biesbroek G, van den  
593 Bergh MR, Veenhoven RH, *et al.* Dysbiosis of upper respiratory tract  
594 microbiota in elderly pneumonia patients. *ISME J.* 2016; 10: 97-108.
- 595 7. Sakwinska O, Bastic Schmid V, Berger B, Bruttin A, Keitel K, Lepage M, *et al.*

596 Nasopharyngeal microbiota in healthy children and pneumonia patients. J Clin  
597 Microbiol. 2014; 52: 1590-4.

598 88. Prina E, Ranzani OT, Torres A. Community-acquired pneumonia. Lancet.  
599 2015; 386: 1097-108.

600 9. Musher DM, Thorner AR. Community-acquired pneumonia. N Engl J Med.  
601 2014; 371: 1619-28.

602 10. Liu L, Oza S, Hogan D, Perin J, Rudan I, Lawn JE, et al. Global, regional, and  
603 national causes of child mortality in 2000-13, with projections to inform  
604 post-2015 priorities: an updated systematic analysis. Lancet. 2015; 385:  
605 430-40.

606 11. Dagan R, Bhutta ZA, de Quadros CA, Garau J, Klugman KP, Khuri-Bulos N,  
607 et al. The remaining challenge of pneumonia: the leading killer of children.  
608 Pediatr Infect Dis J. 2011; 30: 1-2.

609 12. Qin Q, Baoping Xu, Liu X, Shen K. Status of Mycoplasma pneumoniae  
610 pneumonia in chinese children: a systematic review. Advances in  
611 Microbiology. 2014; 4: 704-11.

Formatted: Font: Not Italic

612 ~~9~~13. Lu Z, Dai W, Liu Y, Zhou Q, Wang H, Li D, *et al.* The alteration of  
613 nasopharyngeal and oropharyngeal microbiota in children with MPP and  
614 non-MPP. *Genes (Basel)*. 2017; 8.

615 ~~10~~14. Dai W, Wang H, Zhou Q, Feng X, Lu Z, Li D, *et al.* The concordance between  
616 upper and lower respiratory microbiota in children with Mycoplasma  
617 pneumoniae pneumonia. *Emerg Microbes Infect*. 2018; 7: 92.

618 ~~11~~15. Hasegawa K, Mansbach JM, Ajami NJ, Espinola JA, Henke DM, Petrosino JF,  
619 *et al.* Association of nasopharyngeal microbiota profiles with bronchiolitis  
620 severity in infants hospitalised for bronchiolitis. *Eur Respir J*. 2016; 48:  
621 1329-39.

622 ~~12~~16. de Steenhuijsen Piters WA, Heinonen S, Hasrat R, Bunsow E, Smith B,  
623 Suarez-Arrabal MC, *et al.* Nasopharyngeal microbiota, host transcriptome,  
624 and disease severity in children with respiratory syncytial virus infection. *Am*  
625 *J Respir Crit Care Med*. 2016; 194: 1104-15.

626 ~~13~~17. Pettigrew MM, Gent JF, Kong Y, Wade M, Ganseboom S, Bramley AM, *et al.*  
627 Association of sputum microbiota profiles with severity of

Formatted: Font: Not Italic

628 community-acquired pneumonia in children. BMC Infect Dis. 2016; 16: 317.

629 ~~14~~18. Vissing NH, Chawes BL, Bisgaard H. Increased risk of pneumonia and  
630 bronchiolitis after bacterial colonization of the airways as neonates. Am J  
631 Respir Crit Care Med. 2013; 188: 1246-52.

632 ~~15~~19. Mika M, Mack I, Korten I, Qi W, Aebi S, Frey U, *et al.* Dynamics of the nasal  
633 microbiota in infancy: a prospective cohort study. J Allergy Clin Immunol.  
634 2015; 135: 905-12.e11.

635 ~~16~~20. Zhang R, Wang H, Deng J. A 4-Year-Old Girl With Progressive Cough and  
636 Abnormal Blood Smear. Clinical Infectious Diseases. 2017; 64: 1630–31.

637 ~~21. Qin J, Li R, Raes J, Arumugam M, Burgdorf KS, Manichanh C, *et al.* A~~  
638 ~~human gut microbial gene catalogue established by metagenomic sequencing.~~  
639 ~~Nature. 2010; 464: 59–65.~~

640 ~~17.~~ Li J, Jia H, Cai X, Zhong H, Feng Q, Sunagawa S, *et al.* An integrated catalog  
641 of reference genes in the human gut microbiome. Nat Biotechnol. 2014; 32:  
642 834-41.

643 ~~18~~22. Qin J, Li Y, Cai Z, Li S, Zhu J, Zhang F, *et al.* A metagenome-wide association

644 [study of gut microbiota in type 2 diabetes. Nature. 2012; 490: 55-60.](#)

645 ~~23. Zhang C, Yin A, Li H, Wang R, Wu G, Shen J. *et al.* Dietary modulation of gut~~

646 ~~microbiota contributes to alleviation of both genetic and simple obesity in~~

647 ~~children. EBioMedicine. 2015; 2: 968-84.~~

648 ~~24. Lloyd Price J, Mahurkar A, Rahnward G, Crabtree J, Orvis J, Hall AB, *et al.*~~

649 ~~Strains, functions and dynamics in the expanded Human Microbiome Project.~~

650 ~~Nature. 2017; 550: 61-66.~~

651 19. Rosas-Salazar C, Shilts MH, Tovchigrechko A, Schobel S, Chappell JD,

652 Larkin EK, *et al.* Differences in the nasopharyngeal microbiome during acute

653 respiratory tract infection with human rhinovirus and respiratory syncytial

654 virus in infancy. J Infect Dis. 2016; 214: 1924-28.

655 ~~20. Olson CA, Vuong HE, Yano JM, Liang QY, Nusbaum DJ, Hsiao EY. The gut~~

656 ~~microbiota mediates the anti-seizure effects of the ketogenic diet. Cell. 2018;~~

657 ~~173: 1728-41.~~

658 ~~21~~25. Stewart CJ, Mansbach JM, Wong MC, Ajami NJ, Petrosino JF, Camargo CAJ,

659 *et al.* Associations of nasopharyngeal metabolome and microbiome with

660 severity among infants with bronchiolitis: a multi-omic analysis. Am J Respir

661 Crit Care Med. 2017; 196: 882-91.

662 [2226](#). Quinn RA. Integrating microbiome and metabolome data to understand

663 infectious airway disease. Am J Respir Crit Care Med. 2017; 196: 806-07.

664 [2327](#). Yang J, Hooper WC, Phillips DJ, Talkington DF. Cytokines in Mycoplasma

665 pneumoniae infections. Cytokine Growth Factor Rev. 2004; 15: 157-68.

666 [2428](#). Peteranderl C, Sznajder JI, Herold S, Lecuona E. Inflammatory responses

667 regulating alveolar ion transport during pulmonary infections. Front Immunol.

668 2017; 8: 446.

669 [2529](#). Miller SI, Ernst RK, Bader MW. LPS, TLR4 and infectious disease diversity.

670 Nat Rev Microbiol. 2005; 3: 36-46.

671 [2630](#). Patkee WR, Carr G, Baker EH, Baines DL, Garnett JP. Metformin prevents the

672 effects of Pseudomonas aeruginosa on airway epithelial tight junctions and

673 restricts hyperglycaemia-induced bacterial growth. J Cell Mol Med. 2016; 20:

674 758-64.

675 [2731](#). Hewitt R, Webber J, Farne H, Trujillo-Torralbo M-B, Footitt J, Molyneaux PL,

Formatted: Font: Not Italic

Formatted: Font: Not Italic

676 *et al.* Airway glucose in virus-induced COPD exacerbations. *Am J Respir Crit*  
677 *Care Med.* 2016; 192: A6323.

678 ~~2832~~. Garnett JP, Nguyen TT, Moffatt JD, Pelham ER, Kalsi KK, Baker EH, *et al.*  
679 Proinflammatory mediators disrupt glucose homeostasis in airway surface  
680 liquid. *J Immunol.* 2012; 189: 373-80.

681 ~~2933~~. Kalsi KK, Baker EH, Fraser O, Chung YL, Mace OJ, Tarelli E, *et al.* Glucose  
682 homeostasis across human airway epithelial cell monolayers: role of diffusion,  
683 transport and metabolism. *Pflugers Arch.* 2009; 457: 1061-70.

684 ~~3034~~. Philips BJ, Redman J, Brennan A, Wood D, Holliman R, Baines D, *et al.*  
685 Glucose in bronchial aspirates increases the risk of respiratory MRSA in  
686 intubated patients. *Thorax.* 2005; 60: 761-4.

687 ~~3135~~. Man WH, de Steenhuijsen Piters WA, Bogaert D. The microbiota of the  
688 respiratory tract: gatekeeper to respiratory health. *Nat Rev Microbiol.* 2017;  
689 15: 259-70.

690 ~~3236~~. Ji P, Zhang Y, Wang J, Zhao F. MetaSort untangles metagenome assembly by  
691 reducing microbial community complexity. *Nat Commun.* 2017; 8: 14306.

692 [3337](#). Olm MR, Brown CA-O, Brooks B, Banfield JF. dRep: a tool for fast and  
693 accurate genomic comparisons that enables improved genome recovery from  
694 metagenomes through de-replication. ISME J. 2017; 11: 2864-68.

695 [3438](#). Saraya T, Kurai D, Nakagaki K, Sasaki Y, Niwa S, Tsukagoshi H, *et al.* Novel  
696 aspects on the pathogenesis of *Mycoplasma pneumoniae pneumonia* and  
697 therapeutic implications. Front Microbiol. 2014; 5: 410.

698 [3539](#). Floss HG, Yu TW. Rifamycin-mode of action, resistance, and biosynthesis.  
699 Chem Rev. 2005; 105: 621-32.

700 [3640](#). Nesar S, MH. S, Rahim N, Rehman R. Emergence of resistance to  
701 fluoroquinolones among gram positive and gram negative clinical isolates.  
702 Pak J Pharm Sci. 2012; 25: 877-81.

703 [3741](#). Axelsen PH. A chaotic pore model of polypeptide antibiotic action. Biophys J.  
704 2008; 94: 1549-50.

705 [3842](#). Harris M, Clark J, Coote N, Fletcher P, Harnden A, McKean M, *et al.* British  
706 Thoracic Society guidelines for the management of community acquired  
707 pneumonia in children: update 2011. Thorax. 2011; 66 Suppl 2: ii1-23.

Formatted: Font: Not Italic

708 ~~3943~~. Bradley JS, Byington CL, Shah SS, Alverson B, Carter ER, Harrison C, *et al*.  
709 The management of community-acquired pneumonia in infants and children  
710 older than 3 months of age: clinical practice guidelines by the Pediatric  
711 Infectious Diseases Society and the Infectious Diseases Society of America.  
712 Clin Infect Dis. 2011; 53: e25-76.

713 ~~4044~~. Lee H, Yun KW, Lee HJ, Choi EH. Antimicrobial therapy of  
714 macrolide-resistant *Mycoplasma pneumoniae* pneumonia in children. Expert  
715 Rev Anti Infect Ther. 2018; 16: 23-34.

716 ~~4145~~. Hasegawa K, Mansbach JM, Ajami NJ, Espinola JA, Henke DM, Petrosino JF,  
717 *et al*. Association of nasopharyngeal microbiota profiles with bronchiolitis  
718 severity in infants hospitalised for bronchiolitis. Eur Respir J. 2016; 48:  
719 1329-39.

720 ~~4246~~. Hasegawa K, Linnemann RW, Mansbach JM, Ajami NJ, Espinola JA,  
721 Petrosino JF, *et al*. Nasal airway microbiota profile and severe bronchiolitis in  
722 infants: a case-control study. Pediatr Infect Dis J. 2017; 36: 1044-51.

723 ~~4347~~. Citti C, Dordet-Frisoni E, Nouvel LX, Kuo CH, Baranowski E. Horizontal

Formatted: Font: Not Italic

724 gene transfers in *Mycoplasmas* (Mollicutes). *Curr Issues Mol Biol.* 2018; 29:  
725 3-22.

Formatted: Font: Not Italic

726 4448. Xiao L, Ptacek T, Osborne JD, Crabb DM, Simmons WL, Lefkowitz EJ, *et al.*  
727 Comparative genome analysis of *Mycoplasma pneumoniae*. *BMC Genomics.*  
728 2015; 16: 610.

Formatted: Font: Not Italic

729 4549. Rohde H, Qin J, Cui Y, Li D, Loman NJ, Hentschke M, *et al.* Open-source  
730 genomic analysis of Shiga-toxin-producing *E. coli* O104:H4. *N Engl J Med.*  
731 2011; 365: 718-24.

Formatted: Font: Not Italic

732 4650. Davies MR, Holden MT, Coupland P, Chen JH, Venturini C, Barnett TC, *et al.*  
733 Emergence of scarlet fever *Streptococcus pyogenes* emm12 clones in Hong  
734 Kong is associated with toxin acquisition and multidrug resistance. *Nat Genet.*  
735 2015; 47: 84-7.

Formatted: Font: Not Italic

736 4751. Kutty PK, Jain S, Taylor TH, Bramley AM, Diaz MH, Ampofo K, *et al.*  
737 *Mycoplasma pneumoniae* among children hospitalized with  
738 community-acquired pneumonia. *Clin Infect Dis.* 2019; 68: 5-12.

Formatted: Font: Not Italic

739 4852. Blyth CC, Gerber JS. Macrolides in children with community-acquired

740 pneumonia: panacea or placebo? J Pediatric Infect Dis Soc. 2018; 7: 71-77.

741 ~~49~~53. Yang D, Chen L, Chen ZA-O. The timing of azithromycin treatment is not

742 associated with the clinical prognosis of childhood Mycoplasma pneumoniae

Formatted: Font: Not Italic

743 pneumonia in high macrolide-resistant prevalence settings. PLoS One. 2018;

744 13: e0191951.

745 ~~50~~54. Larsen JM, Musavian HS, Butt TM, Ingvorsen C, Thyssen AH, Brix S. Chronic

746 obstructive pulmonary disease and asthma-associated Proteobacteria, but not

747 commensal Prevotella spp., promote Toll-like receptor 2-independent lung

Formatted: Font: Not Italic

748 inflammation and pathology. Immunology. 2015; 144: 333-42.

749 ~~51~~55. Segal LN, Clemente JC, Tsay JC, Koralov SB, Keller BC, Wu BG, *et al.*

750 Enrichment of the lung microbiome with oral taxa is associated with lung

751 inflammation of a Th17 phenotype. Nat Microbiol. 2016; 1: 16031.

752 ~~52~~56. de Dios Caballero J, Vida R, Cobo M, Maiz L, Suarez L, Galeano J, *et al.*

753 Individual patterns of complexity in cystic fibrosis lung microbiota, including

754 predator bacteria, over a 1-year period. MBio. 2017; 8: e00959-17.

755 ~~53~~57. Maier L, Pruteanu M, Kuhn M, Zeller G, Telzerow A, Anderson EE, *et al.*

756 Extensive impact of non-antibiotic drugs on human gut bacteria. *Nature*. 2018;  
757 555: 623-28.

758 5458. Qin J, Li R, Raes J, Arumugam M, Burgdorf KS, Manichanh C, *et al.* A  
759 human gut microbial gene catalogue established by metagenomic sequencing.  
760 *Nature*. 2010; 464: 59-65.

761 59. Lloyd-Price J, Mahurkar A, Rahnavard G, Crabtree J, Orvis J, Hall AB, *et al.*  
762 Strains, functions and dynamics in the expanded Human Microbiome Project.  
763 *Nature*. 2017; 550: 61-66.

764 60. Yan L, Yang M, Guo H, Yang L, Wu J, Li R, *et al.* Single-cell RNA-Seq  
765 profiling of human preimplantation embryos and embryonic stem cells. *Nat*  
766 *Struct Mol Biol*. 2013; 20: 1131-9.

767 5561. Luo R, Liu B, Xie Y, Li Z, Huang W, Yuan J, *et al.* SOAPdenovo2: an  
768 empirically improved memory-efficient short-read de novo assembler.  
769 *Gigascience*. 2012; 1: 18.

770 5662. Zhu W, Lomsadze A, Borodovsky M. Ab initio gene identification in  
771 metagenomic sequences. *Nucleic Acids Res*. 2010; 38: e132.

Formatted: Font: Not Italic

772 ~~5763~~. Delcher AL, Bratke KA, Powers EC, Salzberg SL. Identifying bacterial genes  
773 and endosymbiont DNA with Glimmer. *Bioinformatics*. 2007; 23: 673-9.

774 ~~5864~~. Li W, Godzik A. Cd-hit: a fast program for clustering and comparing large sets  
775 of protein or nucleotide sequences. *Bioinformatics*. 2006; 22: 1658-9.

776 ~~5965~~. Enright AJ, Van Dongen S, Ouzounis CA. An efficient algorithm for  
777 large-scale detection of protein families. *Nucleic Acids Res*. 2002; 30:  
778 1575-84.

779 ~~6066~~. Chao A. Estimating the population size for capture-recapture data with  
780 unequal catchability. *Biometrics*. 1987; 43: 783-91.

781 ~~6167~~. Nielsen HB, Almeida M, Juncker AS, Rasmussen S, Li J, Sunagawa S, *et al*.  
782 Identification and assembly of genomes and genetic elements in complex  
783 metagenomic samples without using reference genomes. *Nat Biotechnol*. 2014;  
784 32: 822-8.

785 ~~6268~~. Shannon P, Markiel A, Ozier O, Baliga NS, Wang JT, Ramage D, *et al*.  
786 Cytoscape: a software environment for integrated models of biomolecular  
787 interaction networks. *Genome Res*. 2003; 13: 2498-504.

788 ~~6369.~~ Zerbino DR, Birney E. Velvet: algorithms for de novo short read assembly  
789 using de Bruijn graphs. *Genome Res.* 2008; 18: 821-9.

790 ~~6470.~~ Bowers RM, Kyrpides NC, Stepanauskas R. Minimum information about a  
791 single amplified genome (MISAG) and a metagenome-assembled genome  
792 (MIMAG) of bacteria and archaea. 2017; 35: 725-31.

793 ~~71.~~ Parks DH, Chuvochina M, Waite DW, Rinke C, Skarshewski A, Chaumeil PA,  
794 et al. A standardized bacterial taxonomy based on genome phylogeny  
795 substantially revises the tree of life. *Nat Biotechnol.* 2018; 36: 996-1004.

796 ~~72.~~ Zhang C, Yin A, Li H, Wang R, Wu G, Shen J, *et al.* Dietary modulation of gut  
797 microbiota contributes to alleviation of both genetic and simple obesity in  
798 children. *EBioMedicine.* 2015; 2: 968-84.

799 ~~65.~~ Kurtz S, Phillippy A, Delcher AL, Smoot M, Shumway M, Antonescu C, *et al.*  
800 Versatile and open software for comparing large genomes. *Genome Biol.* 2004;  
801 5: R12.

802 ~~66.~~ Jia B, Raphenya AR, Alcock B, Waglechner N, Guo P, Tsang KK, *et al.* CARD  
803 2017: expansion and model-centric curation of the comprehensive antibiotic

804 resistance database. *Nucleic Acids Res.* 2017; 45: D566-D73.

805 [6773](#). Chen L, Zheng D, Liu B, Yang J, Jin Q. VFDB 2016: hierarchical and refined  
806 dataset for big data analysis--10 years on. *Nucleic Acids Res.* 2016; 44:  
807 D694-7.

808 [74](#). Ji M, Lee NS, Oh JM, Jo JY, Choi EH, Yoo SJ, *et al.* Single-nucleotide  
809 [polymorphism PCR for the detection of Mycoplasma pneumoniae and](#)  
810 [determination of macrolide resistance in respiratory samples. J Microbiol](#)  
811 [Methods. 2014; 102: 32-6.](#)

812 **Tables**

813 **Table 1.** Sample information

|                        | <b>Pneumonia Patients</b> | <b>Healthy Children</b> |
|------------------------|---------------------------|-------------------------|
|                        | <b>(n=76)</b>             | <b>(n=171)</b>          |
| <b>Characteristics</b> |                           |                         |
| Gender                 |                           |                         |
| Female                 | 24                        | 87                      |
| Male                   | 52                        | 84                      |
| Age (years)            | 2.9(0.2-12.7)             | 4.3(0.1-8.9)            |
| Sampling Site          |                           |                         |
| OP                     | 75                        | 171                     |
| NP                     | 42                        | -                       |
| Lung                   | 46                        | -                       |
| Delivery Mode          |                           |                         |

|                                                  |          |          |
|--------------------------------------------------|----------|----------|
| Vaginally born                                   | 46       | 102      |
| Cesarean section                                 | 30       | 69       |
| Feeding Pattern                                  |          |          |
| Breast                                           | 48       | 84       |
| Breast+Milk                                      | 12       | 66       |
| Milk feed                                        | 16       | 21       |
| Family history of allergy                        | 1        | -        |
| History of pneumonia                             | 14       | -        |
| Asthma                                           | -        | -        |
| <b>Clinical symptoms</b>                         | <b>—</b> | <b>—</b> |
| Lung consolidation,<br>atelectasis, infiltration | 76       | NA       |
| Fever                                            | 44       | -        |
| Cough                                            | 72       | -        |
| Wheezing                                         | 20       | -        |
| Hospitalization time (days)                      | 9(2-37)  | -        |
| CRP(<0.499mg/l)                                  | 22       | NA       |
| PCT(<0.5ng/ml)                                   | 73       | NA       |
| Eosinophils(0.5–5%)                              | 44       | NA       |

Formatted: Centered

814 "-" represents no detection result; "NA" represents not available; CRP, C-response  
815 protein; PCT, procalcitonin

## 816 **Figure Legends**

817 **Figure 1. Construction of the human RMGC.** Genome assembly was performed for  
818 each sample with  $\geq 650$  Mbp of data. For samples with  $< 650$  Mbp of data, the data  
819 from the same respiratory site (NP, OP or the lung) were mixed and assembled. Gene  
820 predictions were conducted for all assembled contigs with  $\geq 500$  bp and respiratory  
821 bacterial genomes in IMG. Genes with  $\geq 100$  bp were retained. Respiratory gene sets

822 in HMP and PARTIC were combined to construct the non-redundant RMGC  
823 containing 2,245,343 genes.

824 **Figure 2. Rarefaction curves for genes and KOs/gene families.** **a**, Rarefaction  
825 curve for the gene count. **b**, Rarefaction curve for Chao2. The RMGC captured 90.52%  
826 of the prevalent genes. **c**, Rarefaction curve for KOs/gene families. Known functions  
827 saturate quickly to 6,346 groups. After including novel gene families, the rarefaction  
828 curve plateaus when 12,924 groups are detected. Boxes represent the interquartile  
829 ranges (IQRs) between the first and third quartiles, and the line inside the box  
830 represents the median value. Whiskers represent the lowest or highest values within  
831 values 1.5 times the IQR from the first or third quartiles. Circles represent data points  
832 located outside of the whiskers.

833 **Figure 3. Core microbial species in healthy OP microbiota.** The barplot on the top  
834 represent the prevalence of each core species, boxplot beneath the barplot means the  
835 relative abundance of each core species. The specific color stands for different  
836 phylum.

837 **Figure 4. Differentiation of OP microbial samples between healthy children and**

838 **MPP patients. a,** Gene counts in the OP microbiomes of healthy children and  
839 children with pneumonia. **b,** Alpha diversity of the OP microbiome in healthy children  
840 and children with pneumonia. Boxes represent the IQRs between the first and third  
841 quartiles, and the line inside the box represents the median. Whiskers represent the  
842 lowest or highest values within values 1.5 times the IQR from the first or third  
843 quartiles. Points represent data located outside of the whiskers. \*\*\* represents  $p$ -value  
844  $\leq 0.001$ .

845 **Figure 5. Phylogenetic and functional alterations in children with pneumonia. a,**  
846 Size of the circle represents the average relative abundance of CAGs in healthy  
847 children or children with pneumonia. A line between two circles indicates a  
848 Spearman's rank correlation coefficient  $\geq 0.6$  and an adjusted  $p$ -value  $\leq 0.05$ . The  
849 phylum and genus corresponding to each CAG are indicated by the information listed  
850 on the left. **b,** The X-axis represents level-2 functional categories in KEGG, and the  
851 colour of the characters represents level-1 functional categories, which are listed on  
852 the right. The Y-axis shows the relative abundance of level-2 functional categories.  
853 \*, \*\* and \*\*\* represent adjusted  $p$ -value  $\leq 0.05$ ,  $\leq 0.01$  and  $\leq 0.001$ , respectively.

854 **Figure 6. Virulence-factor genes (VFGs) and antibiotic-resistance genes (ARGs)**  
855 **on *Mycoplasma pneumoniae* genome.** The tracks from outside to inside represent  
856 ARGs, genes on plus strand, genes on negative strand and GC skew, respectively.  
857 VFGs painted with different colours refer to the different types of VFGs.

858 **Figure 7. Comparison of relative abundance of 14 re-assembled genomes**  
859 **between healthy children and MPP patients.** The blue circles and red triangles  
860 represent the microbial relative abundance of healthy children and MPP patients.  
861 Solid dot and paired whiskers represent the mean and SD of each microbial relative  
862 abundance. \*, \*\* and \*\*\* represents  $p$ -value  $\leq 0.05$ ,  $\leq 0.01$  and  $\leq 0.001$ ,  
863 respectively. NS stands for no statistical significance.

Figure 1





Figure 3

## Core microbial species of the healthy children's oropharynx

[Click here to access/download;Figure;Figure 3.pdf](#)

**A** Figure 4



**B**



Figure 5

[Click here to access/download;Figure;Figure 5.pdf](#)

A



B









Click here to access/download  
**Supplementary Material**  
Supplemental material legends.docx











Click here to access/download  
**Supplementary Material**  
Supplementary Table 1.xlsx





Click here to access/download  
**Supplementary Material**  
Supplementary Table 2.xlsx





Click here to access/download  
**Supplementary Material**  
Supplementary Table 3.xlsx





Click here to access/download  
**Supplementary Material**  
Supplementary Table 4.xlsx





Click here to access/download  
**Supplementary Material**  
Supplementary Table 5.xlsx





Click here to access/download  
**Supplementary Material**  
Supplementary Table 6.xlsx
